# Supplementary material
Source: Elsevier journal article supplement (http://laufen-in-koeln.de/Themen/Tipps_und_Infos/2022/Dokumente/mmc9.pdf)
Supplement: mmc9 [file mmc9.pdf]

# Cell Metabolism

## Atlas of exercise metabolism reveals time-dependent signatures of metabolic homeostasis

### Graphical abstract

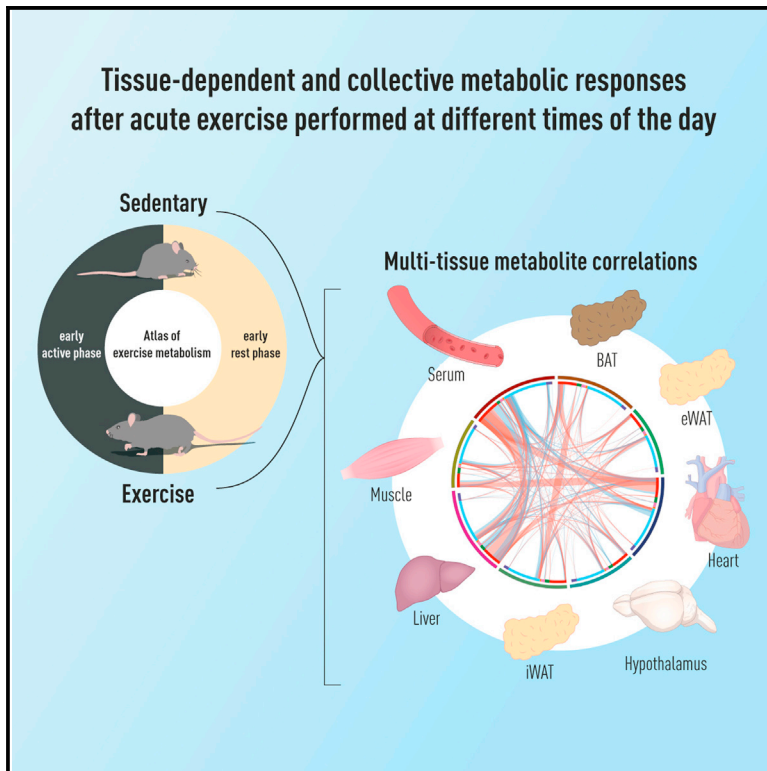

### Authors

Shogo Sato, Kenneth A. Dyar, Jonas T. Treebak, ..., Dominik Lutter, Juleen R. Zierath, Paolo Sassone-Corsi

### Correspondence

dominik.lutter@helmholtz-muenchen.de (D.L.),  
juleen.zierath@ki.se (J.R.Z.)

### In brief

Tissue sensitivity and response to exercise vary according to time of day. Sato et al. present an atlas of exercise metabolism, including global metabolomics profiling of multiple tissues, combined with arteriovenous sampling of hindlimb muscle and sampling across the liver to verify net uptake and release of time- and exercise-dependent signaling biochemicals.

### Highlights

- Time of exercise defines system-wide activation of energy metabolism
- Exercise timing rewires intra-tissue and inter-tissue metabolite correlations
- Maintenance of inter-tissue metabostasis is specified by exercise time
- Comparative analyses reveal time- and tissue-dependent exerkinases

Resource

# Atlas of exercise metabolism reveals time-dependent signatures of metabolic homeostasis

Shogo Sato,<sup>1,11,12</sup> Kenneth A. Dyar,<sup>2,3,11</sup> Jonas T. Treebak,<sup>4,11</sup> Sara L. Jepsen,<sup>4,5</sup> Amy M. Ehrlich,<sup>4</sup> Stephen P. Ashcroft,<sup>4</sup> Kajetan Trost,<sup>4</sup> Thomas Kunzke,<sup>6</sup> Verena M. Prade,<sup>6</sup> Lewin Small,<sup>4</sup> Astrid Linde Basse,<sup>4</sup> Milena Schönke,<sup>7,13</sup> Siwei Chen,<sup>8</sup> Muntaha Samad,<sup>8</sup> Pierre Baldi,<sup>8</sup> Romain Barrès,<sup>4</sup> Axel Walch,<sup>6</sup> Thomas Moritz,<sup>4</sup> Jens J. Holst,<sup>4,5</sup> Dominik Lutter,<sup>3,9,\*</sup> Juleen R. Zierath,<sup>4,7,10,14,\*</sup> and Paolo Sassone-Corsi<sup>1</sup>

<sup>1</sup>Center for Epigenetics and Metabolism, INSERM U1233, Department of Biological Chemistry, School of Medicine, University of California, Irvine, Irvine, CA, USA

<sup>2</sup>Metabolic Physiology, Institute for Diabetes and Cancer, Helmholtz Diabetes Center, Helmholtz Zentrum München, German Research Center for Environmental Health, Neuherberg, Germany

<sup>3</sup>German Center for Diabetes Research, Neuherberg, Germany

<sup>4</sup>Novo Nordisk Foundation Center for Basic Metabolic Research, Faculty of Health and Medical Sciences, University of Copenhagen, Copenhagen, Denmark

<sup>5</sup>Department of Biomedical Sciences, Faculty of Health Science, University of Copenhagen, Copenhagen, Denmark

<sup>6</sup>Research Unit Analytical Pathology, Helmholtz Zentrum München, German Research Center for Environmental Health, Neuherberg, Germany

<sup>7</sup>Department of Molecular Medicine and Surgery, Integrative Physiology, Karolinska Institutet, Stockholm, Sweden

<sup>8</sup>Institute for Genomics and Bioinformatics, University of California, Irvine, Irvine, CA, USA

<sup>9</sup>Computational Discovery Research, Institute for Diabetes and Obesity, Helmholtz Diabetes Center, Helmholtz Zentrum München, German Research Center for Environmental Health, Neuherberg, Germany

<sup>10</sup>Department of Physiology and Pharmacology, Integrative Physiology, Karolinska Institutet, Stockholm, Sweden

<sup>11</sup>These authors contributed equally

<sup>12</sup>Present address: Center for Biological Clocks Research, Department of Biology, Texas A&M University, College Station, TX, USA

<sup>13</sup>Present address: Department of Medicine, Division of Endocrinology and Einthoven Laboratory for Environmental Vascular Medicine, Leiden University Medical Center, Leiden, the Netherlands

<sup>14</sup>Lead contact

\*Correspondence: [dominik.lutter@helmholtz-muenchen.de](mailto:dominik.lutter@helmholtz-muenchen.de) (D.L.), [juleen.zierath@ki.se](mailto:juleen.zierath@ki.se) (J.R.Z.)

<https://doi.org/10.1016/j.cmet.2021.12.016>

## SUMMARY

Tissue sensitivity and response to exercise vary according to the time of day and alignment of circadian clocks, but the optimal exercise time to elicit a desired metabolic outcome is not fully defined. To understand how tissues independently and collectively respond to timed exercise, we applied a systems biology approach. We mapped and compared global metabolite responses of seven different mouse tissues and serum after an acute exercise bout performed at different times of the day. Comparative analyses of intra- and inter-tissue metabolite dynamics, including temporal profiling and blood sampling across liver and hindlimb muscles, uncovered an unbiased view of local and systemic metabolic responses to exercise unique to time of day. This comprehensive atlas of exercise metabolism provides clarity and physiological context regarding the production and distribution of canonical and novel time-dependent exerkinic metabolites, such as 2-hydroxybutyrate (2-HB), and reveals insight into the health-promoting benefits of exercise on metabolism.

## INTRODUCTION

Circadian clocks orchestrate rhythmic biological processes, including metabolism, hormone production, immunity, and behavior. Temporal gating of physiology is essential for maintaining homeostasis, and chronic disruption of circadian alignment causes metabolic diseases (Masri and Sassone-Corsi, 2018). Light is the main *zeitgeber* (time giver) communicating

external time to the central clock in the hypothalamic suprachiasmatic nucleus (SCN). Rhythmic feeding and locomotor activity, both SCN-controlled processes, entrain peripheral clocks in metabolic tissues independently of light (Damiola et al., 2000; Kemler et al., 2020; Small et al., 2020; Wolff and Esser, 2012). Timing of food intake can rewire temporal coordination of metabolism and gene expression and thereby modify disease progression (Hatori et al., 2012; Hawley et al., 2020; Lundell

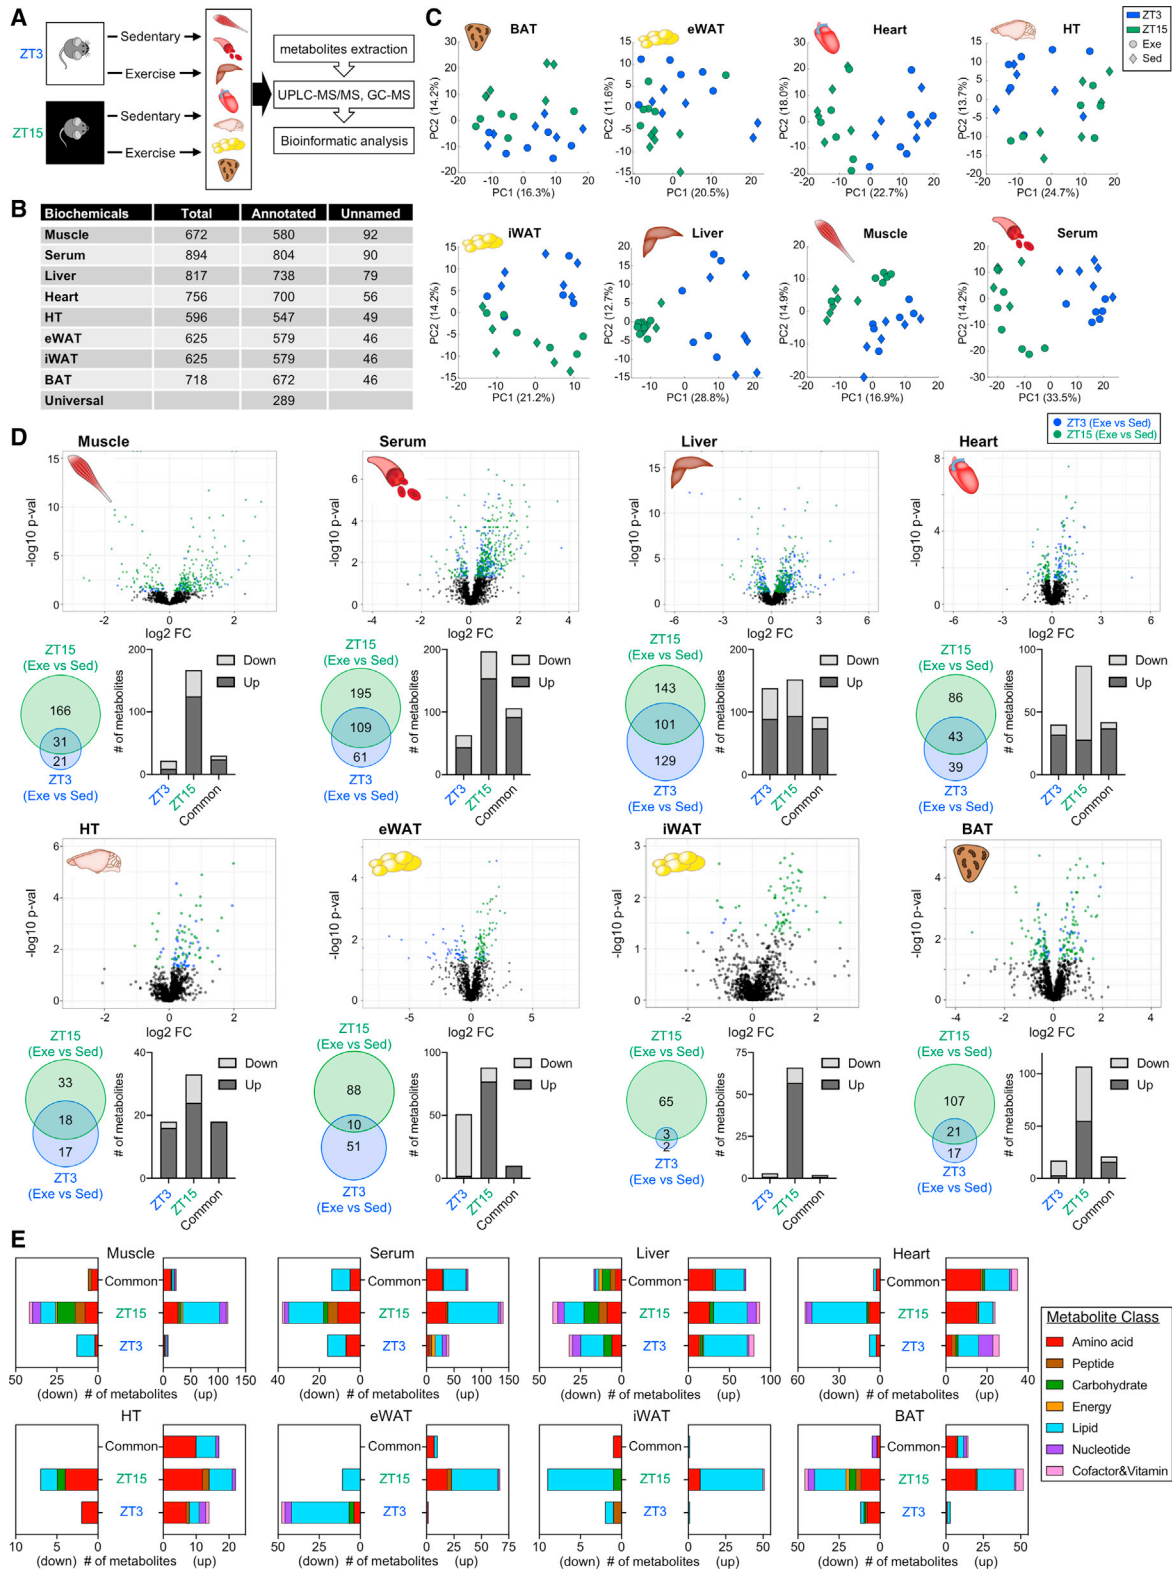

**Figure 1. Multitissue metabolomics upon exercise at the early rest (ZT3) versus early active phase (ZT15)**

(A) Study design. Skeletal muscle, serum, liver, heart, hypothalamus (HT), epididymal white adipose tissue (eWAT), inguinal white adipose tissue (iWAT), and brown adipose tissue (BAT) were harvested after acute exercise at ZT3 or ZT15 for metabolomic analysis.

(legend continued on next page)

et al., 2020). Circadian control of systemic energy homeostasis and behavioral activity can also be entrained by exercise in a time-of-day-specific manner (Sato et al., 2019; Schroeder et al., 2012). Thus, food restriction, exercise, or energetic stressors that influence the temporal regulation of metabolism are relevant for glycemic control and weight loss in type 2 diabetes and obesity.

Exercise performed at different times of day influences skeletal muscle metabolic pathways and endurance capacity (Ezagouri et al., 2019; Sato et al., 2019). Thus, the timing of exercise may specify close alignment between tissue clocks and promote coherent and efficient temporal gating of metabolic processes. While the major effects of exercise on energy metabolism are well defined (Egan and Zierath, 2013; Hawley et al., 2014), a comprehensive view of how exercise timing determines tissue-specific metabolic adaptations and system-wide tissue coordination is lacking.

Here, we present an atlas of exercise metabolism, including global metabolomics profiling of multiple tissues and serum, and arteriovenous sampling of hindlimb muscle and sampling across the liver to verify net uptake and release of time- and exercise-dependent signaling biochemicals (exerkines). We show how timed exercise rewires tissue-specific and systemic metabolism and highlight differential tissue production and distribution of exerkines. We also validate 2-hydroxybutyrate (2-HB) as a time-dependent exerkine at the systemic level. Our resource provides physiological context about diurnal production and distribution of a wide range of signaling metabolites linked to sleep, memory, energy homeostasis, endurance capacity, and performance.

## RESULTS

### Time of exercise determines magnitude and type of metabolic response

To determine how timing of exercise impacts local tissue and systemic metabolism, we collected serum, skeletal muscle (gastrocnemius), liver, heart, hypothalamus (HT), epididymal white adipose tissue (eWAT), inguinal subcutaneous white adipose tissue (iWAT), and interscapular brown adipose tissue (BAT). Exercise or control sham exercise was performed for 1 h on a treadmill at either ZT3 (early light/rest phase) or ZT15 (early dark/active phase), and tissues were collected at ZT4 or ZT16 immediately after exercise or control sham exercise, respectively (Figure 1A). We performed untargeted metabolomics and detected 600–900 metabolites in each tissue, including ~550–800 annotated metabolites (Figure 1B; Data S2). A common group of 289 annotated metabolites was detected in all tissues and serum (Figures 1B and S1A). PCA analysis revealed time (ZT) and treatment (exercise versus sedentary) effects on the metabolome for most of the tissues (Figures 1C and S1B). Each tissue displayed unique metabolic responses according to exercise time. Exercise at ZT15 altered 197 muscle metabolites, whereas 52 metabolites were impacted by exercise at

ZT3 (Figures 1D, S1C, and S1D; Data S3). This included 31 metabolites common to both time points, and 166 (ZT15) and 21 (ZT3) metabolites specific to each. Serum, heart, HT, iWAT, and BAT showed the greatest response to exercise at ZT15. The liver displayed 129 and 143 metabolites impacted by exercise at ZT3 and ZT15, respectively, and 101 altered at both times. Altered eWAT metabolites were generally reduced by exercise at ZT3, yet most were increased by exercise at ZT15. Thus, exercise had a time-dependent and tissue-specific impact on metabolites.

Investigating these changes according to metabolite class (Figure 1E), amino acids (AAs) and lipids were more impacted by exercise at ZT15. However, the liver showed more lipids impacted by exercise at ZT3. Nucleotides were also more impacted by exercise at ZT15 in muscle, liver, and BAT, as were liver carbohydrates. A comparison of the top five metabolites altered in each tissue confirmed canonical exercise-associated changes and captured how the exercise responses largely reflect time-dependent differences in nutritional state and hormone production (Figure S1E). Corticosterone was a top-ranking metabolite increased by exercise at ZT3 in muscle, heart, HT, eWAT, iWAT, and BAT. Liver glycogen-derived metabolites maltopentaose, maltotetraose, and maltotriose showed the greatest reductions after exercise at ZT3, whereas glucose was decreased after exercise at ZT15. Lactate and indolelactate (indole-3-lactic acid), a tryptophan-derived lactate metabolite, were impacted by exercise at ZT15 in muscle, heart, eWAT, and BAT. These results underscore how nutritional status changes over time and how exercise-dependent energy metabolism varies accordingly.

### Tissue- and time-dependent metabolomic effects of exercise

Corticosterone was increased by exercise in all tissues, but the liver and muscle showed higher levels after exercise at ZT3 (Figure S1F). Ketones like beta-hydroxybutyrate (BHB) and urea from ammonia detoxification were increased more by exercise at ZT15, indicating a greater reliance on fatty acid (FA) oxidation and increased buffering against metabolic stress during exercise performed in the early active phase (Figure S1F). Hypothalamic neurotransmitters serotonin, dopamine, and its catabolite homovanillate (HVA) increased by exercise at ZT15 (Figure S1G). Data were stratified to identify unique metabolites changing according to time of exercise and tissue (Data S4), allowing for the identification of tissue-specific biomarkers.

### Systemic activation of metabolic pathways in response to timed exercise

#### Functional enrichment of metabolites changed by exercise at different times of day

To identify which metabolic pathways were directly impacted by exercise, or in a time- and tissue-specific manner, we performed Kyoto Encyclopedia of Genes and Genomes (KEGG) enrichment analysis on significantly altered metabolites (Figure 2A). Exercise

(B) Detected biochemicals including named and unnamed biochemicals.

(C) PCA plots of tissue-specific samples. Color of dots refers to time and shape refers to sedentary or exercise conditions.

(D) Volcano plots, Venn diagrams, and bar charts of changed metabolites.

(E) Biological classification of altered metabolites.  $n = 5-6$  per group; altered metabolites determined by two-way ANOVA,  $p < 0.05$ . Sed, sedentary; Exe, exercise.



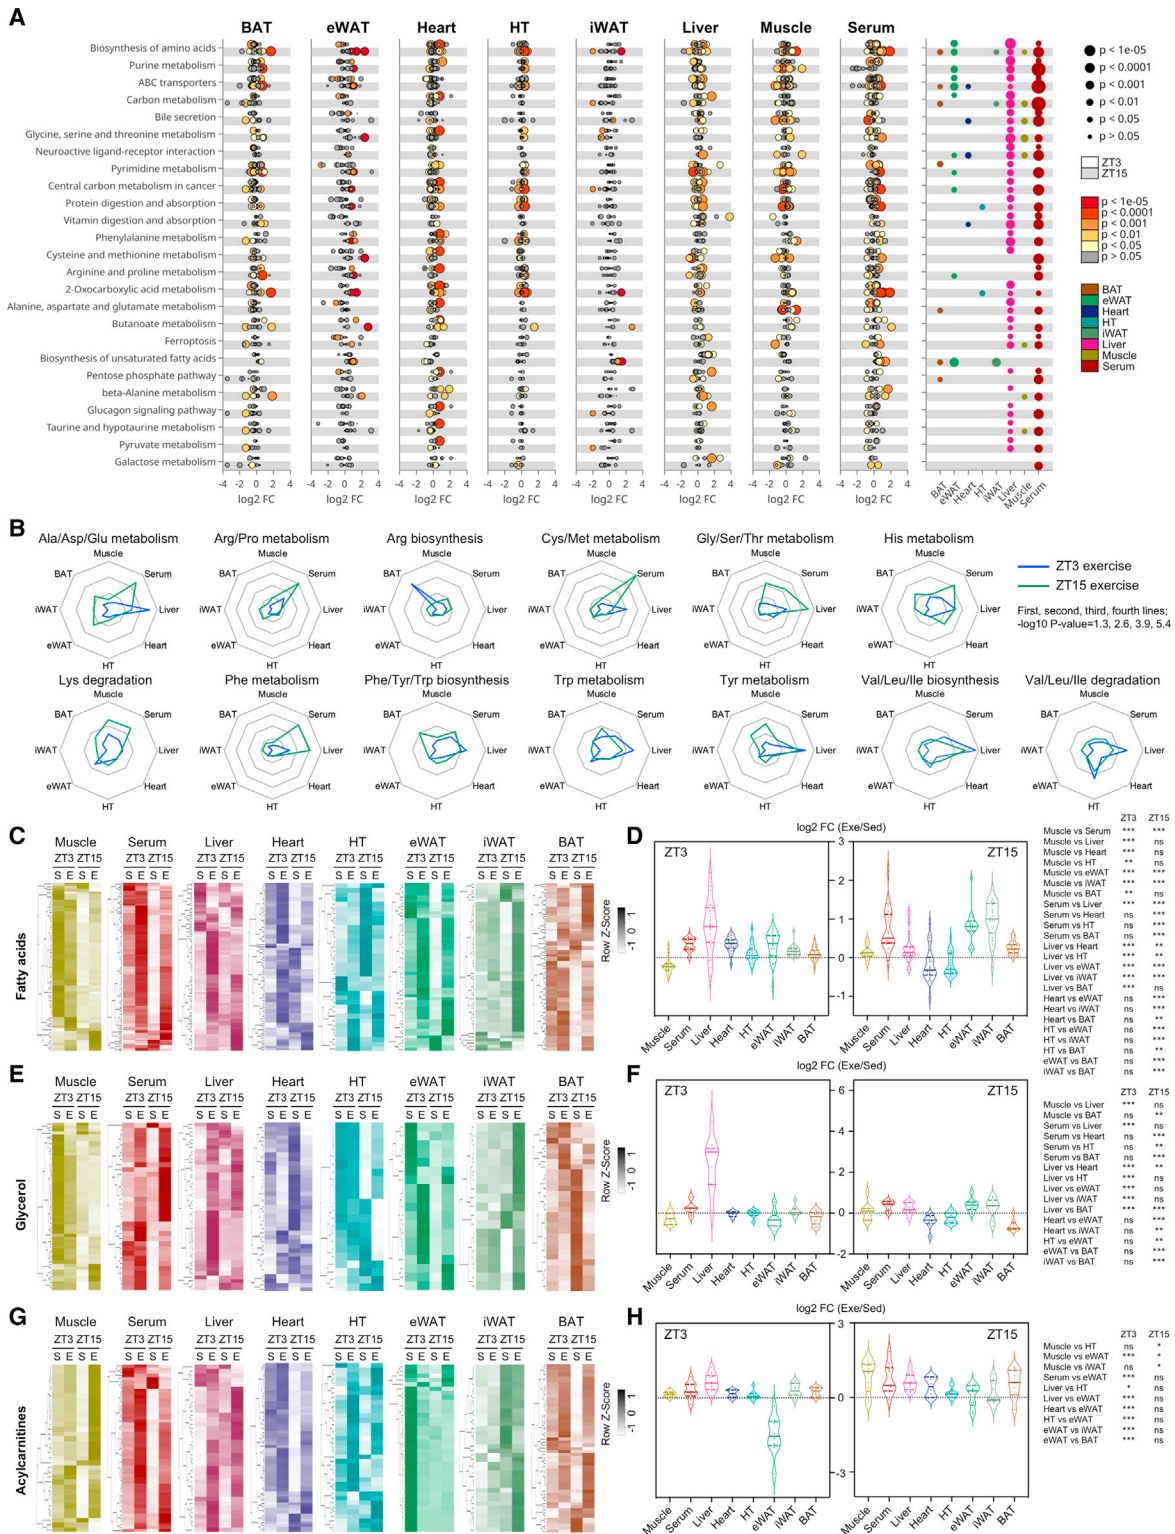

(legend continued on next page)

at ZT15 elicited a robust enrichment of pathways involved in nucleotide metabolism (purine and pyrimidine) and AA metabolism (glycine, serine and threonine, phenylalanine, cysteine and methionine, arginine and proline, beta-alanine, and taurine and hypotaurine). Metabolites related to biosynthesis of unsaturated FAs were increased by exercise at ZT15 in both eWAT and iWAT. The liver showed distinct FA metabolism responses, with FA metabolites increased selectively by ZT3 exercise. This highlights a coregulation of lipid degradation pathways according to exercise time. Carbohydrate metabolism was increased in the liver during exercise at ZT3, indicating preferential utilization of glycogen. AA pathways were enriched in skeletal muscle by exercise at ZT15, including cysteine and methionine, along with purines. Serum exhibited the most striking response to exercise, preferably at ZT15, possibly because serum metabolites are integrative and systemic outcomes of the metabolic responses to exercise in each tissue.

### Glycogenolysis and glycolysis

Muscle glycogen content was reduced after exercise at ZT15, but not ZT3 (Figure S2A), confirming our earlier findings (Sato et al., 2019). Hepatic glycogen content exhibited robust time-of-day variation. Accordingly, exercise at ZT3 decreased liver glycogen content, whereas at ZT15 glycogen stores were already low. Skeletal muscle and liver were the only tissues to show reduced glucose levels after exercise at ZT15 (Figure S2B). Glycolysis metabolites were also decreased after exercise at ZT15 in muscle but not in liver (Figure S2C), suggesting that during fasted conditions, exercise leads to a greater activation of muscle glycolysis with energy supplied from liver gluconeogenesis but not via hepatic glycogen breakdown. This was supported by gene expression profiles: muscle genes involved in glycolysis were increased after exercise at ZT15 (Figure S2D), whereas liver genes associated with gluconeogenesis were increased upon exercise at ZT3 (Figure S2E). Thus, glucose production from liver through glycogenolysis and gluconeogenesis may be sufficient during early rest phase exercise at ZT3. Glucose production from the liver may be suppressed during early active phase exercise at ZT15, leading to greater reliance on muscle glycogen.

### AA metabolism

Since the KEGG enrichment pathway analysis indicated that AA metabolism exhibited a robust time-of-day-dependent impact of exercise, we explored tissue and time dependencies of exercise on AA metabolism. Heatmaps displayed global AA metabolites in tissues from sedentary and exercised mice (Figure S2F). AAs were highly enriched in serum of mice exercised at ZT15, suggesting increased protein degradation and AA utilization (Fig-

ure 2B). Muscle glycine, serine, threonine, lysine, and tyrosine metabolism were increased by exercise at ZT15, but not at ZT3. While levels of glycine, serine, threonine, and phenylalanine metabolism were also enriched after exercise at ZT15 in the liver, additional liver AAs exhibited enrichment after exercise at ZT3. Thus, hepatic AA may be produced and utilized differently according to exercise time.

### Lipid metabolism

To understand how time of exercise modulates systemic lipid fluxes, we examined levels of metabolites related to FAs, glycerol, and acylcarnitines. Metabolites related to FA were extracted and displayed as heatmaps (Figure 2C), and the fold-change ratio of FA in exercise versus sedentary conditions at the corresponding time of day was compared (Figure 2D). There was a considerable induction of a subset of FAs in the liver by exercise at ZT3, whereas FAs in serum, eWAT, and iWAT were elevated by exercise at ZT15. Glycerol metabolites in the liver increased after ZT3 exercise, while the elevation was more prominent in iWAT after ZT15 exercise (Figures 2E and 2F). Thus, exercise at ZT3 stimulates lipolysis in liver, but exercise at ZT15 stimulates lipolysis in WAT. Acylcarnitine levels increased more upon ZT15 exercise in muscle and serum, suggesting activation of fat oxidation in muscle and higher energy demand from nonglycolytic sources by exercise at ZT15 (Figures 2G and 2H). These observations are supported by gene expression profiling: muscle genes involved in fat oxidation such as *Ppard* were upregulated exclusively after exercise at ZT15 (Figure S2G), while liver genes encoding lipases such as *Pnpla2* were elevated only after exercise at ZT3 (Figure S2H).

### Tissue specificity of metabolome response to exercise at different times of day

To understand which metabolic processes might be coupled according to time of exercise, we compared significantly altered metabolites between tissues. Pie charts showed only a marginal overlap (Figure S3A), indicating that exercise-induced metabolic alterations are tissue dependent. However, correlating metabolites commonly changed by exercise suggested more coordinated responses (Figure S3A). Upon exercise at ZT3, liver metabolites were less correlated with other tissues, whereas serum and BAT showed greater correlations with other tissues after exercise at ZT3. Muscle and liver metabolites were highly correlated upon exercise at ZT15 but attenuated after exercise at ZT3. The combination of eWAT and other tissues also exhibited a higher correlation coefficient at ZT15, pointing to a distinct metabolic response of eWAT according to exercise time. Metabolites commonly responding to exercise at ZT3

(B) Radar plots representing tissue-specific enrichment of regulated metabolites related to each amino acid class after exercise. First, second, third, and fourth lines from the center indicate  $-\log_{10}$  p value = 1.3, 2.6, 3.9, and 5.4, respectively.

(C) Heatmaps displaying metabolites related to fatty acids.

(D) Effects of exercise at ZT3 (left) and ZT15 (right) on fatty acids common to tissues and serum. The y axis indicates  $\log_2$  FC of levels of each fatty acid in exercise versus sedentary groups.

(E) Heatmaps displaying metabolites related to glycerol.

(F) Effects of exercise at ZT3 (left) and ZT15 (right) on glycerol common to tissues and serum. The y axis indicates  $\log_2$  FC of level of each glycerol in exercise versus sedentary.

(G) Heatmaps displaying metabolites related to acylcarnitines.

(H) Effects of exercise at ZT3 (left) and ZT15 (right) on lipid oxidation common to the seven tissues and serum. The y axis indicates  $\log_2$  FC of levels of each acylcarnitine in exercise versus sedentary.  $n = 5-6$  per group; significantly altered metabolites determined by two-way ANOVA,  $p < 0.05$ . Sed, sedentary; Exe, exercise. One-way ANOVA to detect significance between tissues with Tukey post hoc testing.

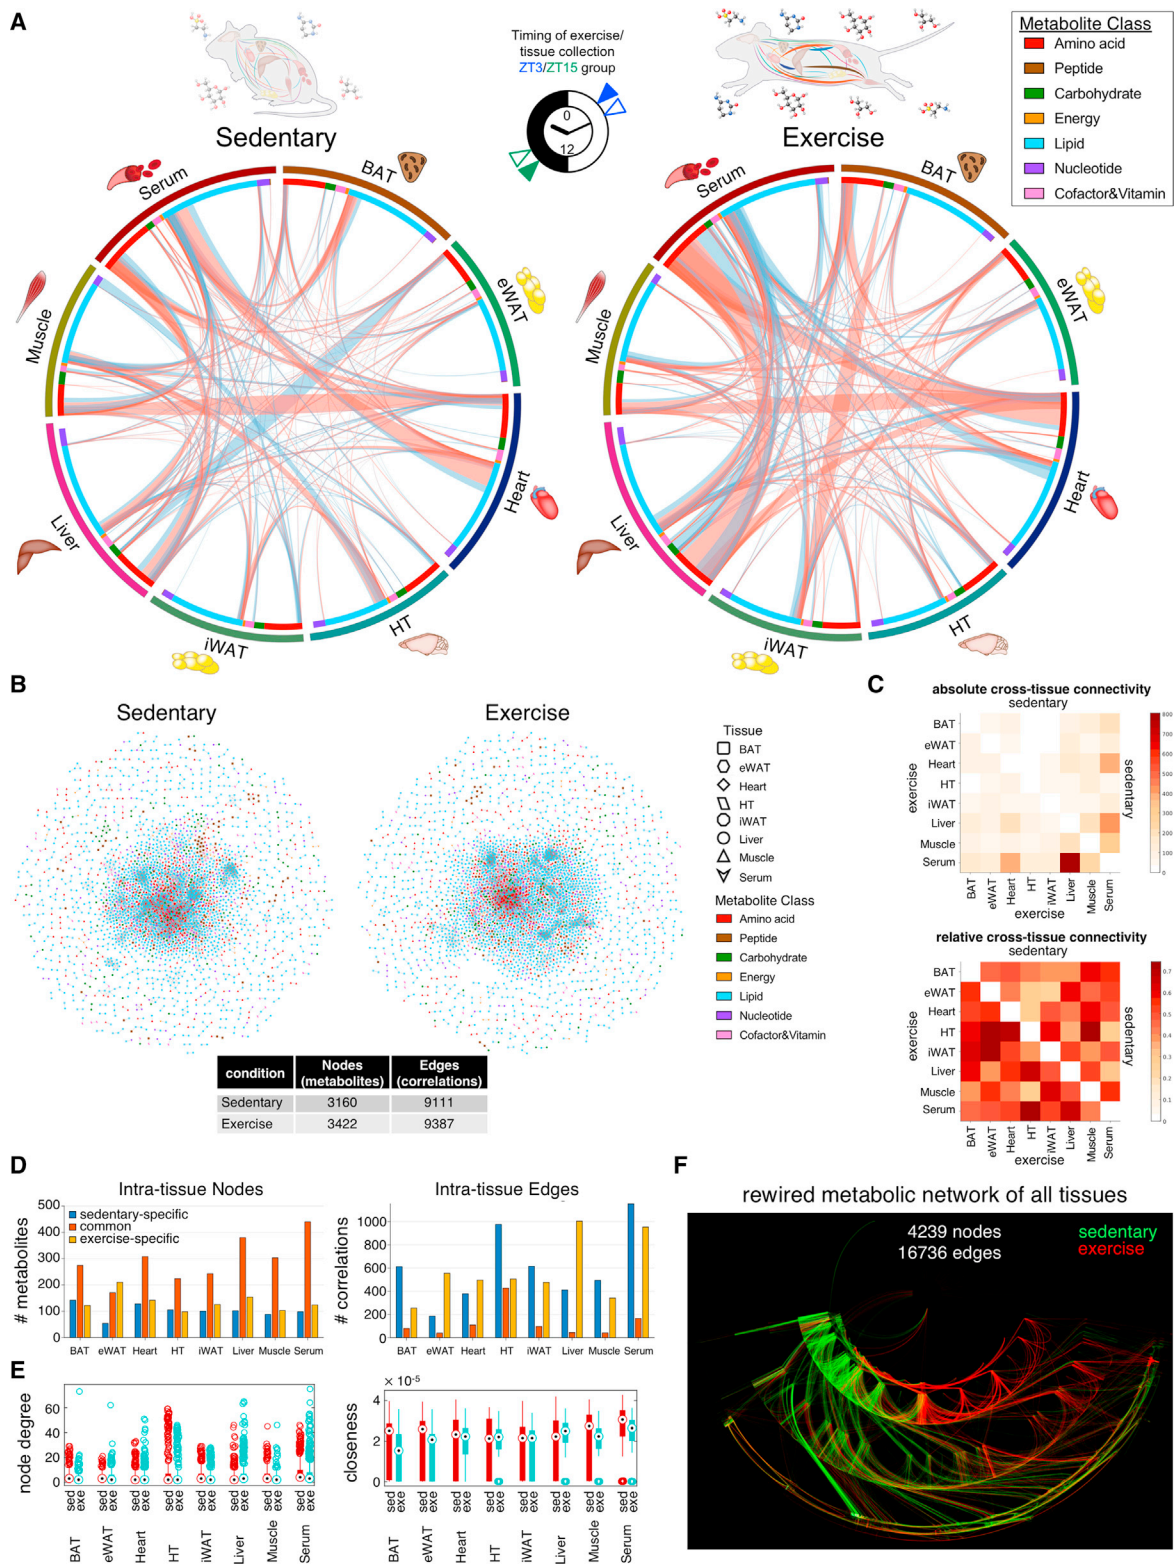

**Figure 3. Exercise rewires intra- and inter-tissue metabolic correlations**

(A) Summary of inter-tissue metabolite correlations. Colored circles refer to tissue and metabolite classes. Ribbons connecting metabolite inter-tissue classes refer to significant correlations between metabolites. Ribbon color refers to correlation coefficient sign (red, positive; blue, negative). Ribbon thickness refers to number of significantly correlated metabolites. The clock icon indicates the timing of exercise (filled triangles) and tissue collection (opened triangles).

(legend continued on next page)



were more enriched with AAs than with lipids, while exercise at ZT15 increased enrichment of AAs and lipids. This highlights greater systemic coordination of AA and lipid metabolism during ZT15 exercise. Carbohydrates were highly enriched within correlated metabolites between muscle and liver after ZT15 exercise. Thus, metabolic pathways are activated in a time- and tissue-dependent manner.

We then focused on metabolites changed within specific tissues or combinations of tissues (Figures S3B and S3C). After exercise at ZT3, the concentration of 14 metabolites (mostly lipids) was changed only in the liver and serum, while 6 AAs unique to serum and heart were changed. The correlation of metabolites altered within serum and liver and within serum and heart was significant (Figure S3D). In response to exercise at ZT15, several metabolites were altered that were unique to serum, liver, or muscle (Figure S3C), with a group of carbohydrates enriched the most. Distinct clusters related to glycogen and glucose metabolism were among metabolites changed between muscle and liver after exercise at ZT15 (Figure S3E), pointing to the activation of glycogenolysis and glycolysis as a common metabolic hallmark. Metabolites commonly changed in serum and tissues were predominately lipids and AAs (Figure S3C), including a common group of lipids in serum and iWAT after ZT15 exercise (Figure S3E). We found systemic and more coordinated activation of lipid and AA metabolism, as well as local activation of carbohydrate metabolism specific to muscle and liver after exercise in the fasted state.

### Exercise rewires intra-tissue and inter-tissue metabolite correlations

Mapping all pair-wise metabolite correlations (Figure 3A), exercise mainly enhanced interactions among serum, heart, liver, and muscle. These differences reflect broad exercise-dependent shifts in tissue coordination in support of energy substrate supply and demand. To reveal underlying metabolic relationships, we combined all tissues and constructed undirected condition-specific correlation networks (Figure 3B). Sedentary and exercise groups shared a similar number of nodes (~3,000 metabolites correlated across tissues) and edges (~9,000 correlations) (Figure 3B). More cross-tissue correlations were found after exercise (Figure 3C). Examining intra-tissue correlations, ~50%–60% nodes were common to sedentary and exercise groups (eWAT as the exception), while only ~20% were specific to either condition (Figures 3D and S4A–S4D; Data S5). Edges reflected exercise-induced metabolic rewiring, with few shared connections between sedentary and exercise conditions. Exercise reprogrammed interactions and reduced overall connectivity within BAT and HT, whereas muscle, heart, iWAT, and serum

retained connectivity. Metabolite connectivity was increased within the liver and eWAT, underscoring its prominent role as a metabolic hub; liver node “degree distribution” (edges per node) and “closeness distribution” (centrality of nodes corresponding to the whole network) were increased by exercise (Figure 3E). Integrating networks into a metabolite “correlation universe” revealed how networks within and among tissues are rewired by exercise. Nodes with the highest connectivity were major points of diversion among conditions (Figures 3F and S4D). Inspection of the top commonly reprogrammed nodes revealed that exercise increased connectivity among metabolites involved in AA and lipid metabolism. These include *N*-acetyl-leucine, 2-HB/2-hydroxyisobutyrate, ketone body BHB, carnitine synthesis metabolite hydroxy-N6,N6,N6-trimethyllysine, the uremic toxin phenol sulfate, and the purine nucleotide guanine. Exercise reduced connectivity of the tryptophan catabolite and neurotoxin quinolinate, as well as *N*-acetyl-glycine, and a variety of FAs and glycerophospholipids (Figures S4E and S4F).

### Exercise at ZT15 selectively strengthens skeletal muscle-liver 24-h tissue correlations

To investigate how time and exercise interact to determine intra-tissue and inter-tissue metabolite temporal correlations, we focused on muscle and the liver, major organs involved in energy homeostasis during exercise and food restriction. We calculated pair-wise metabolite temporal correlations within and between tissues collected at 4-h intervals across 24 h after an exercise bout performed at ZT3 or ZT15 versus sedentary controls (Figures S5A and S5B). Exercise timing determined the number (Figures S5C–S5F), amplitude (Figure S5G), phase (Figures S5H and S5I), and class (Figures S5J and S5K) of 24-h oscillating liver metabolites (Data S2 and S6). Comparing 24-h metabolomes further revealed tissue-, time-, and exercise-dependent alterations (Figure S5L).

The liver and muscle shared fewer correlations under sedentary conditions, with ZT3 sharing the fewest (Figures 4A and 4B; Data S6). Exercise increased temporal correlations between lipids, AAs, nucleotides, and carbohydrates, but the effect was greater at ZT15. Constructing 24-h correlation networks for each condition (Figure 4B), we visualized how exercise increased overall metabolite connectivity between tissues in a time-dependent manner. We detected a similar range of ~600–700 correlated metabolites under sedentary and exercise conditions. Edges were highly context dependent, with 1,411 (ZT3) and 1,583 (ZT15) temporal correlations detected under sedentary conditions, and 2,077 (ZT3) and 3,019 (ZT15) detected after exercise. Most nodes were common between conditions, and yet, the edges were highly context dependent (Figure 4C).

(B) Networks of significantly correlated metabolites. Each node refers to a metabolite, shape indicates tissue, and color refers to metabolite class. Edges are drawn for each intra-tissue or inter-tissue correlation, and color refers to correlation coefficient sign (red, positive; blue, negative). Node and edge numbers are summarized in the table.

(C) Heatmaps show absolute (upper) and relative (lower) cross-tissue connections (significant correlations). Upper right triangles refer to sedentary conditions, and lower left triangles refer to exercise conditions.

(D) Number of common, sedentary-, or exercise-dependent nodes and edges associated with each tissue.

(E) Boxplot of network properties according to tissue. Node degree refers to number of connections of each node, and closeness refers to closeness centrality. Black dots display the median, the size of the boxes the upper and lower quartiles, whiskers minimum and maximum values, and circles refer to outliers.

(F) Combined DyNet visualization of all tissues and serum with a metabolite interaction network highlighting rewired nodes and edges. Red nodes and edges are present only under exercise; green nodes and edges are present only under sedentary conditions; gray nodes and edges are present under both.



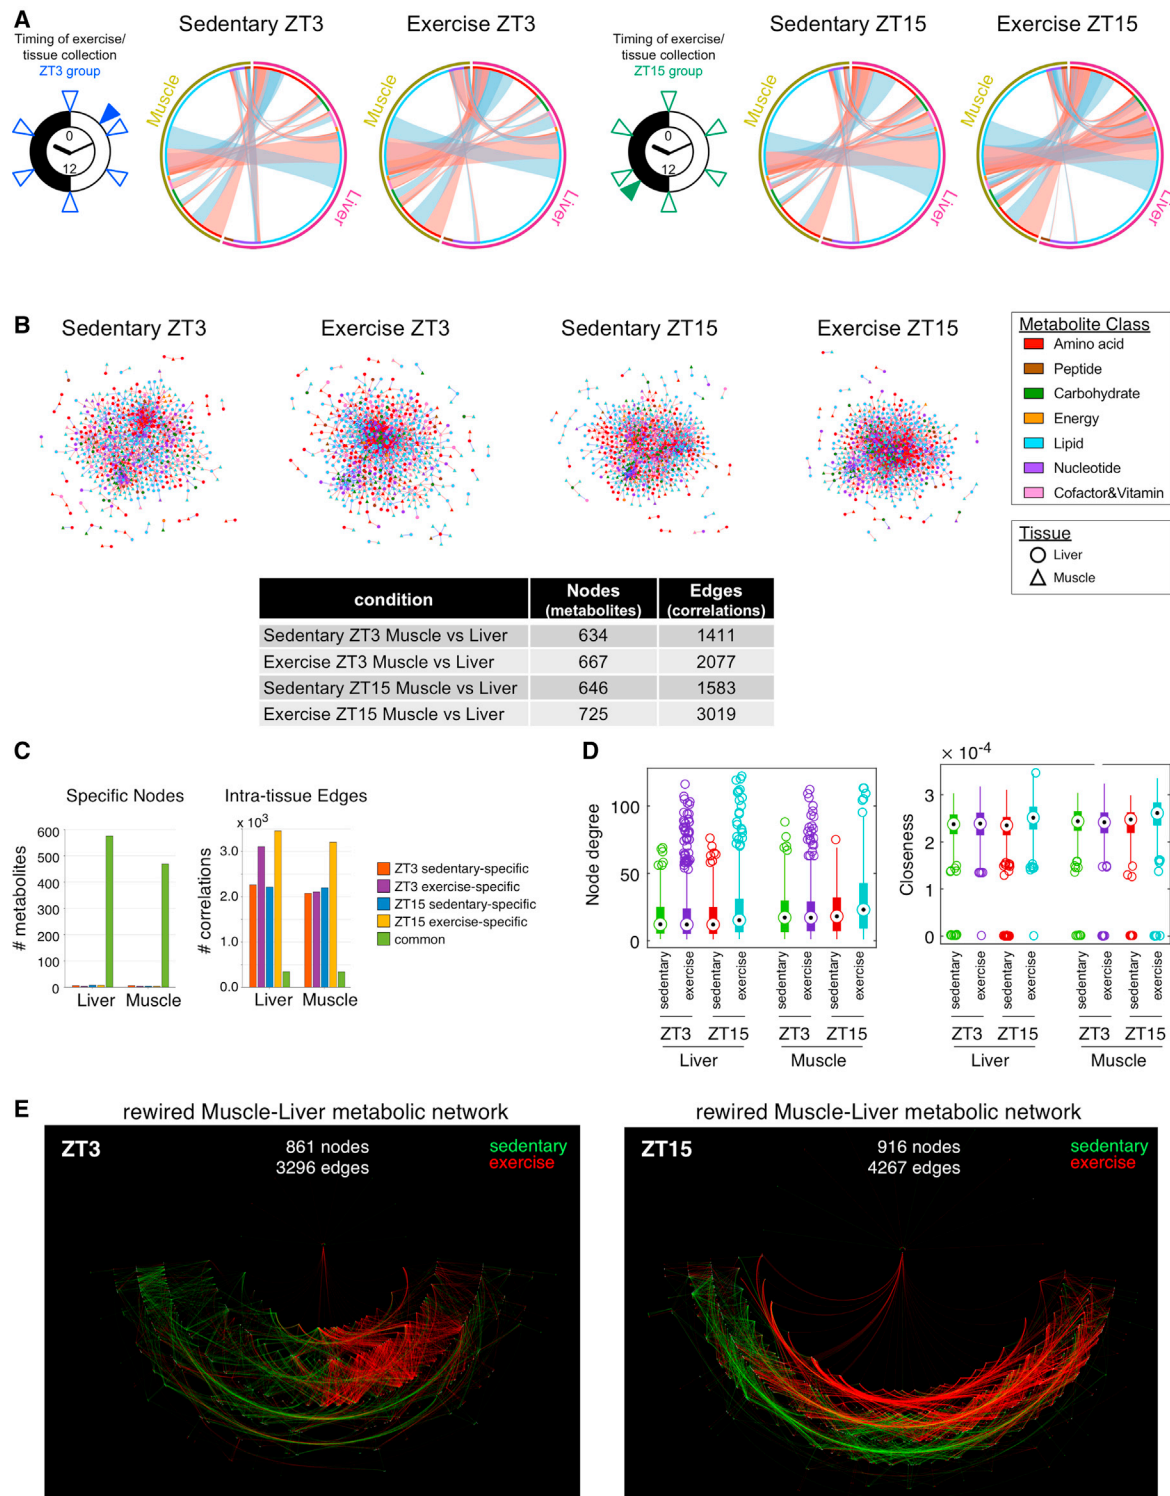

**Figure 4. Exercise time determines muscle-liver 24-h temporal correlation**

(A) Muscle-liver metabolite correlations according to condition and time. Colored circles refer to tissue and metabolite class. Ribbons refer to correlations between metabolites. Ribbon color refers to correlation coefficient sign (red, positive; blue, negative). Ribbon thickness refers to number of correlated metabolites. Clock icons indicate the time of exercise (filled triangles) and tissue collection (opened triangles) during ZT3 and ZT15.

(B) Networks of muscle-liver correlated metabolites. Each node refers to a metabolite, shape indicates tissue, and color refers to metabolite class. Edges are drawn for each intra-tissue or inter-tissue correlation, and color refers to correlation coefficient sign (red, positive; blue, negative). Table shows total number of nodes (metabolites) and edges (significant correlations) in muscle and liver according to condition and time.

(legend continued on next page)

Node degree and closeness were increased by exercise at ZT15 (Figure 4D), highlighting distinct timing differences in metabolite response and network wiring (Figure 4E). Our data reveal how intra-tissue and inter-tissue metabolism are differentially poised to both react and respond to exercise at different times of the day.

### Time and tissue dependency of exercise-induced metabolites

Our resource allows for comparison of metabolite exerkines and provides context about their production and distribution in a time- and tissue-dependent manner. We noted distinct baseline, exercise time-, and tissue-dependent differences among established exerkines, including lactate, gamma-aminobutyrate (GABA), 3-aminoisobutyrate (BAIBA), kynurenine, kynurenate, 5-aminoimidazole-4-carboxamide ribonucleotide (AICAR), and  $\alpha$ -ketoglutarate ( $\alpha$ -KG) (Figure 5A), with greater responses at ZT15. Lactate was reduced, whereas  $\alpha$ -KG and kynurenine were increased in muscle and the liver at ZT15. Kynurenate was increased by exercise only in liver at ZT15. BAIBA was increased by exercise in serum, liver, heart, and HT at ZT15. GABA was detected in muscle and HT but was increased by exercise only in muscle. AICAR was increased more by exercise at ZT3 in the heart, as was serum  $\alpha$ -KG.

Exercise at ZT15 appeared to preferentially direct skeletal muscle S-adenosylmethionine (SAM) metabolism toward adenine nucleotide salvage, transsulfuration pathways linked to glutathione (GSH) production, and maintenance of cytosolic  $\text{NAD}^+/\text{NADH}$  (Figures 5B and 5C). Exercise at ZT15 reduced SAM levels in muscle, liver, and heart. In muscle, exercise reduced downstream SAM metabolites S-adenosylhomocysteine (SAH), 5-methylthioadenosine (MTA), adenosine, and GSH, while the ratio of oxidized to reduced glutathione (GSSG/GSH) was increased at ZT15. Muscle adenine and 5'-AMP were increased by exercise only at ZT15. Adenine conversion to AMP can be increased by availability of 5-phosphoribosyl-1-pyrophosphate (PRPP), which at ZT15 was increased in muscle under sedentary conditions and reduced by exercise. We confirmed the specificity of this metabolic signal by immunoblot analysis of activated AMPK (Figure 5D). Skeletal muscle contains a large pool of adenine nucleotides and maintaining sufficient ATP levels is important to sustain contractions. To avoid metabolic stress and fatigue, adenine nucleotide degradation must be balanced by increased salvage and *de novo* synthesis (Brault and Terjung, 2001). Our results suggest exercise-induced adenine nucleotide salvage is regulated locally within the muscle in a time-dependent manner.

To further clarify the time-dependent activation of skeletal muscle AMPK upon exercise, we determined how the nutritional state influences adenine nucleotide metabolism. To mimic exercise under different nutritional states, myotubes were subjected to electrical pulse stimulation (EPS) in the absence or presence

of glucose. We measured adenine nucleotides and adenosine using liquid chromatography-mass spectrometry (LC-MS) (Figure 5E). AMP production was elevated by EPS in glucose-depleted conditions, consistent with our finding that exercise at ZT15 increased muscle AMP levels and AMPK activation (Figures 5C and 5D). ATP regeneration was attenuated by EPS in glucose-depleted conditions.

Liver and skeletal muscle are producers and net exporters of circulating GSH (Kretzschmar and Muller, 1993; Sen, 1998). GSH production depends on cysteine generated from transsulfuration of homocysteine, with increased flux shown to delay ageing and increase lifespan (Sbodio et al., 2019). SAH produced from SAM-mediated methylation reactions is rapidly converted to homocysteine, which, in the presence of sufficient methionine and vitamin B<sub>6</sub>, proceeds via cystathionine toward the formation of 2-ketobutyrate (2-KB; also known as 2-oxobutyrate), cysteine, and ammonia (Figures 5B and 5C). As a structural analog of pyruvate, 2-KB is readily reduced to 2-HB by lactate dehydrogenase, causing regeneration of  $\text{NAD}^+$ . Since this is a near-equilibrium reaction (Rogatzki et al., 2015), exercise-induced accumulation of 2-HB likely reflects a combination of factors, including cytosolic redox imbalance and energy stress. 2-HB was proposed as a specific *in vivo* biomarker for  $\text{NAD}^+/\text{NADH}$  ratio in liver (Goodman et al., 2020), but since it showed time-dependent accumulation in all tissues studied, it may be a general indicator of systemic  $\text{NAD}^+/\text{NADH}$ .

### Time-of-day- and exercise-dependent arteriovenous balance of metabolites

To gain insight into dynamic metabolite exchange between tissues, we exercised mice at different times of the day and profiled arteriovenous differences in metabolites across hindlimb muscles and the liver (portal to hepatic vein). We collected (1) serum from the portal vein and vena cava (mainly liver veins) and liver and (2) arterial and venous serum and skeletal muscle (Figure 6A).

We detected hundreds of metabolites and related pathways with time- and exercise-dependent arteriovenous (A/V) differences in each tissue (Figures 6B–6D, S6A, and S6B; Data S2). At ZT3, the liver was a net exporter of AAs, lipids, nucleotides, carbohydrates, TCA (tricarboxylic acid) cycle intermediates, and a variety of vitamins and cofactors, and an importer of lipids, AAs, and nucleotides (Figure 6B). Liver uptake and release were increased by exercise at ZT3 but reduced at ZT15. Muscle was a net importer of AAs, lipids, carbohydrates, nucleotides, and other energy metabolites while releasing ~20%–50% fewer metabolites than consumed. Net changes in muscle metabolite balance were minimal under sedentary conditions at ZT15, and yet, with exercise, the net metabolite uptake increased to ZT3 levels. Exercise increased net muscle metabolite release at both time points. This likely reflects time- and exercise-associated changes in blood flow (Bartman et al., 2021) and highlights the

(C) Number of common, sedentary-, or exercise-dependent nodes and edges at each time point between muscle and liver.

(D) Boxplots of network properties according to tissue, time, and condition. Node degree refers to the number of connections of each node, and closeness refers to closeness centrality. Black dots display the median, the size of the boxes the upper and lower quartiles, whiskers minimum and maximum values, and circles refer to outliers.

(E) Combined DyNet visualization of muscle-liver metabolite interaction network highlighting rewired nodes and edges. Red nodes and edges are present only under exercise; green nodes and edges are present only under sedentary conditions; gray nodes and edges are present under both.

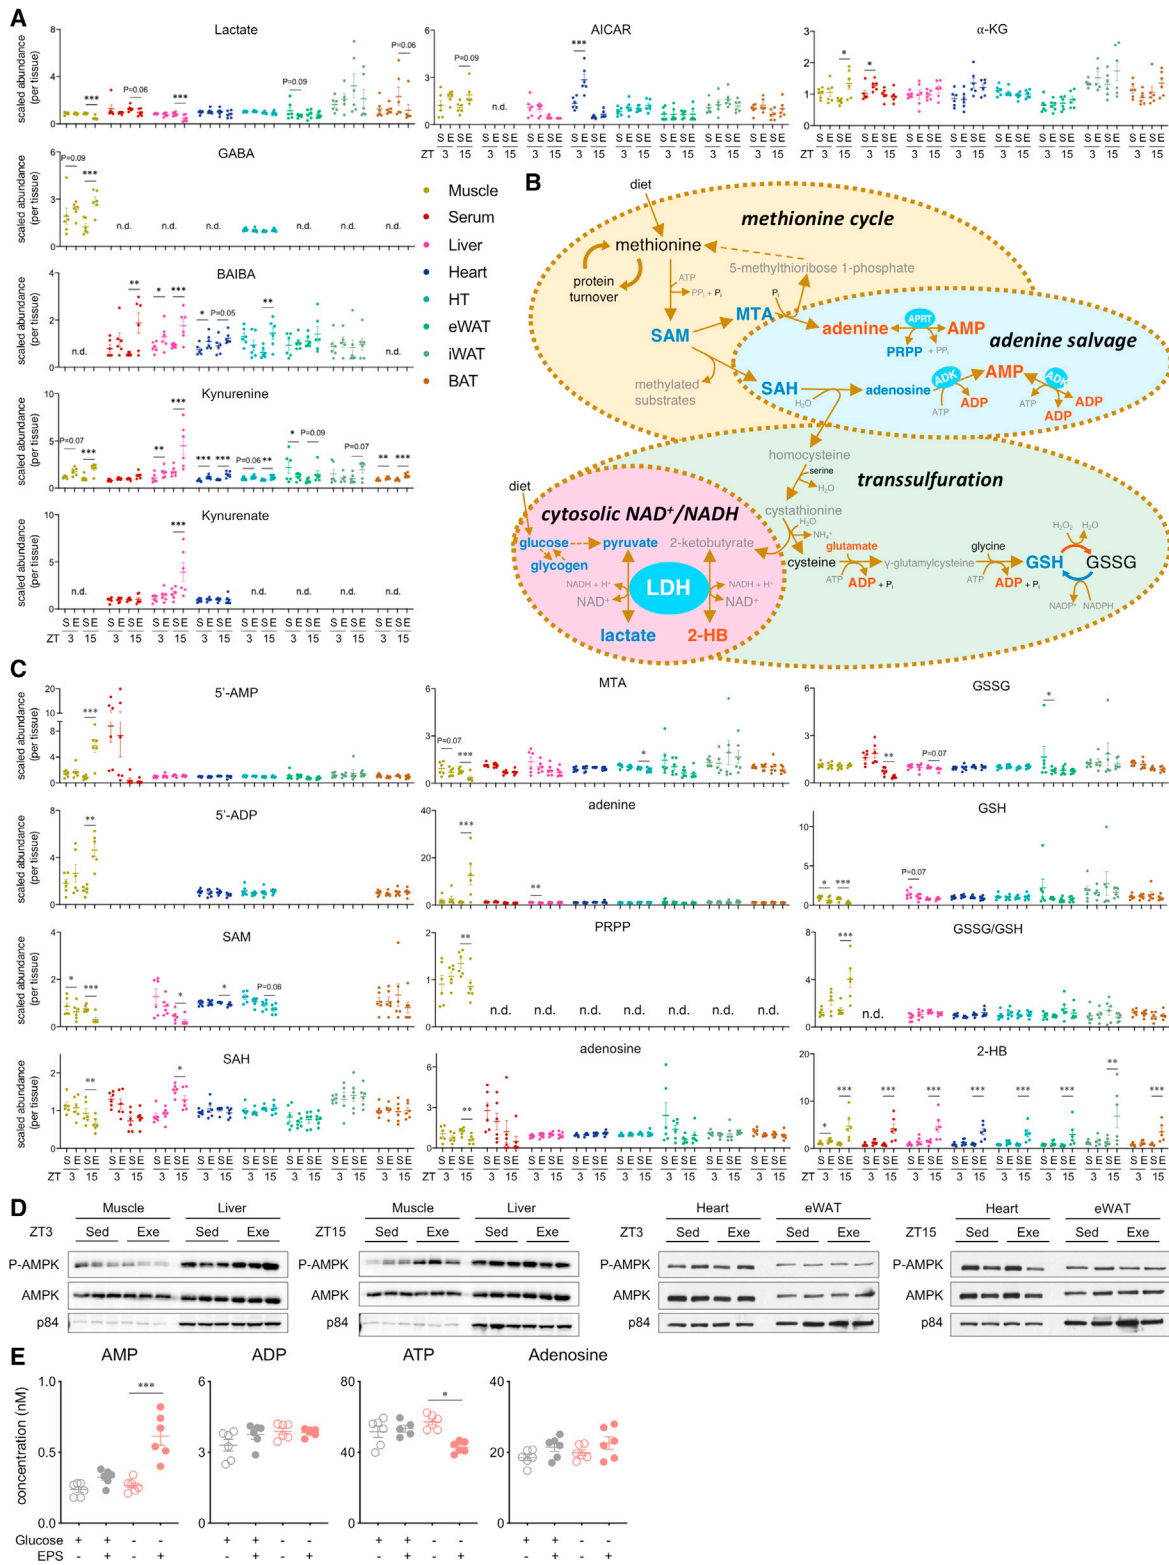

**Figure 5. Tissue- and time-dependent links between SAM metabolism, adenine salvage, GSH production, and maintenance of cytosolic  $NAD^+/NADH$**

(A) Exerkine metabolite plots. Individual data points are colored according to tissue and represented as mean  $\pm$  SEM ( $n = 5-6$ ) and analyzed by two-way ANOVA (sedentary versus exercise at corresponding time), \* $p < 0.05$ , \*\* $p < 0.01$ , and \*\*\* $p < 0.001$ . GABA, gamma-aminobutyrate; BAIBA, 3-aminoisobutyrate; AICAR, 5-aminoimidazole-4-carboxamide ribonucleotide;  $\alpha$ -KG,  $\alpha$ -ketoglutarate.

(legend continued on next page)



importance of physical activity in the production and release of muscle-derived biomolecules.

Visualizing all A/V muscle and liver metabolites with correlations derived from tissue metabolite profiling (Figure 4A) revealed the direction of metabolite flow between tissues in relation to coupled metabolic processes (Figures 6E and S6B). Increased correlations after exercise at ZT3 were driven largely by metabolite exchanges between muscle and liver. Increased correlations after exercise at ZT15 reflected a coordinated release of metabolites by muscle and liver. Liver and muscle were the only tissues to show reduced glucose concentrations after exercise at ZT15 (Figure S2B), with liver glucose also reduced under sedentary conditions. Thus, we hypothesized that after exercise at ZT15, liver glucose production and release were insufficient to maintain glucose levels and meet increased energetic demands. A/V data confirmed that systemic glucose was reduced after exercise at ZT15 (Figure 6F). Net liver glucose release was blunted only after exercise at ZT15. Net muscle glucose uptake was increased only upon exercise at ZT3. This inter-tissue glucose exchange supports intra-tissue glucose and glycogen dynamics and subsequent carbohydrate utilization in response to exercise in a time-dependent fashion.

The branched-chain amino acids (BCAAs) leucine, isoleucine, and valine showed net release by the liver under sedentary and exercise conditions at ZT3 and under sedentary conditions at ZT15. Only isoleucine showed net release by liver after exercise at ZT15 (Figures 6G, S6C, and S6D). BCAAs were similarly taken up by muscle under sedentary and exercise conditions at ZT3. Circulating BCAAs were highest after exercise at ZT15, but the net BCAA balance in muscle did not change. Branched-chain keto acids  $\alpha$ -ketoisocaproate (4-methyl-2-oxopentanoate),  $\alpha$ -keto- $\beta$ -methylvalerate (3-methyl-2-oxovalerate), and  $\alpha$ -ketoisovalerate (3-methyl-2-oxobutyrates) showed net release by muscle and net uptake by the liver, regardless of the time of day or exercise.

Contextualizing A/V differences for the range of metabolites known to increase after exercise (Morville et al., 2020), one can reconstruct relative changes in metabolic wiring and infer the direction of flow. The liver showed net lactate release under all conditions except for exercise at ZT15, whereas muscle showed net lactate release only after exercise at ZT15 (Figure 6H). TCA cycle intermediates showed heterogeneous responses (Figure S6E).  $\alpha$ -KG showed net uptake by the liver under all conditions and time points. While  $\alpha$ -KG trended toward net muscle release, this was significant only at ZT3. Succinate showed net liver release under all conditions, and yet, the only significant change in muscle was the net uptake after exercise at ZT15. Fumarate and malate

showed similar trends of net release by the liver, but release by the muscle was only significant after exercise at ZT15. These changes reflect a flexible, dynamic, and context-specific flux into central metabolic pathways at different entry and exit points.

We noted time- and exercise-dependent A/V differences for metabolites associated with healthy aging (Figure S6F). Liver and muscle were both net exporters of the NAD<sup>+</sup> precursor nicotinate riboside. While liver release was significant under exercise and sedentary conditions, muscle release was significant only after exercise. Net liver release of spermidine was significant only under sedentary conditions, whereas net muscle release was significant only after exercise.

A/V data also revealed regional differences in circulating metabolite concentrations, with relatively high concentrations of portal vein short-chain FAs like butyrate/isobutyrate, which are produced mainly in the colon by bacterial fermentation. The highest butyrate/isobutyrate levels were detected in the portal vein at ZT15 in sedentary mice (Figure 6I), with low net export from the liver under all conditions. Muscle was a net exporter of butyrate/isobutyrate after exercise at ZT15, although relative concentrations were much lower than that in the portal vein.

#### Time-of-day-dependent role of 2-HB in systemic and local tissue metabolism

We selected 2-HB/2-hydroxyisobutyrate for further investigation since this metabolite emerged as a central systemic metabolic hub, connecting metabolites in a time- and exercise-dependent fashion (Figure S4E). 2-HB and 2-hydroxyisobutyrate (2-HIB) are isobaric isomers. To clarify this signal and to quantitatively validate additional hits, we used targeted gas chromatography-mass spectrometry (GC-MS) with spiked internal standards. Endogenous 2-HB was elevated in the liver and muscle following exercise at ZT15 (Figure 7A). The liver showed higher levels (~0.01–0.2  $\mu\text{mol/g}$ ) than muscle (~0.002–0.03  $\mu\text{mol/g}$ ). These concentrations and dynamics resembled AAs, including BCAAs and threonine. The ketone body BHB showed similar dynamics, albeit at 10 $\times$  higher levels. 2-HIB was unaltered in response to time or exercise, and concentrations remained near the limit of detection (LOD) and ~20 $\times$  lower than 2-HB. Thus, exercise increased the production of 2-HB in a time-dependent manner. Applying unsupervised clustering of targeted metabolomics data (Figure 7B), 2-HB was highly correlated with other hydroxybutyric acids, and biomarkers for diabetes (Newgard et al., 2009; Nilsen et al., 2020; Wang et al., 2013), yet inversely correlated with hexoses.

To understand how temporal 2-HB dynamics are impacted by exercise (Figure 7C), we compared baseline data from sedentary

(B) Pathway scheme of methionine cycle, purine salvage, and transsulfuration pathways. Blue metabolites, reduced in muscle by exercise at ZT15; orange metabolites, increased in muscle by exercise at ZT15; black metabolites, unchanged; gray metabolites, no data.

(C) Metabolite plots of SAM metabolism in relation to methionine cycle, purine salvage, and transsulfuration pathways. Individual data points are colored according to tissue and represented as mean  $\pm$  SEM (n = 5–6) and analyzed by two-way ANOVA (sedentary versus exercise at corresponding time), \*p < 0.05, \*\*p < 0.01, and \*\*\*p < 0.001. SAM, S-adenosylmethionine; MTA, 5-methylthioadenosine; SAH, S-adenosylhomocysteine; PRPP, 5-phosphoribosyl diphosphate; AMP, adenosine 5'-monophosphate; APRT, adenosine phosphoribosyltransferase; ADK, adenosine kinase; AK, adenylate kinase; ADP, adenosine 5'-diphosphate; ATP, adenosine triphosphate; GSH, reduced glutathione; GSSG, oxidized glutathione; LDH, lactate dehydrogenase; 2-HB, 2-hydroxybutyrate; n.d., no data. S and Sed, sedentary; E and Exe, exercise.

(D) AMPK protein and phosphorylation in tissues.

(E) AMP, ADP, ATP, and adenosine concentration in myotubes. Individual data points are represented as mean  $\pm$  SEM (n = 6) and analyzed by two-way ANOVA using Bonferroni post hoc testing (with versus without EPS), \*p < 0.05 and \*\*\*p < 0.001.



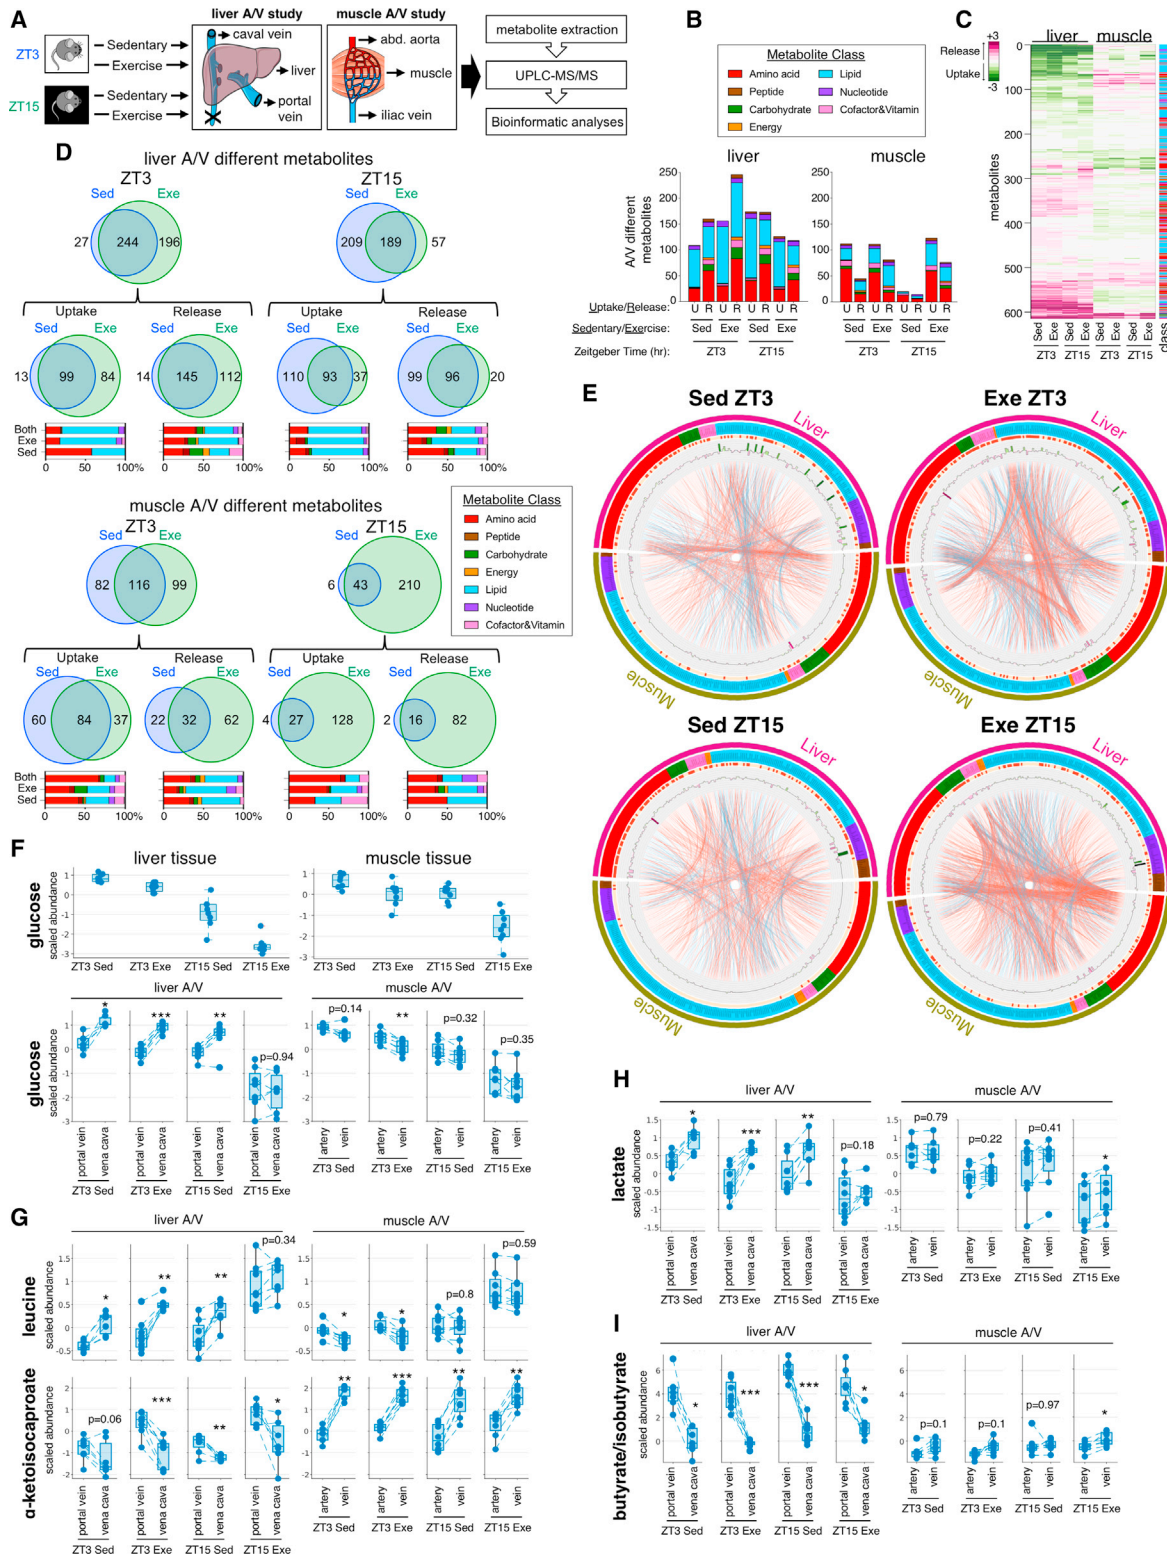

**Figure 6. Arteriovenous (A/V) differences of liver and muscle in response to timed exercise**

(A) Study design. Tissues were collected immediately after exercise at ZT3 or ZT15. For sampling across the liver, serum was collected from the portal vein and caval vein. For hindlimb muscle A/V sampling, serum was collected from the abdominal aorta (abd. aorta) and iliac vein. Figure elements modified from SMART (Servier Medical Art), licensed under a Creative Commons Attribution 3.0 Generic License. <http://smart.servier.com/>.

(B) Number and class of altered A/V metabolites (adjusted  $p < 0.05$ , paired t test).

(legend continued on next page)

mice (Dyar et al., 2018b) to our data after timed exercise. 2-HB levels in serum, liver, and muscle oscillate together over 24 h, with lower levels during the light phase and ~2- to 4-fold higher levels during the dark phase. Exercise and sham exercise elevated 2-HB levels in liver and muscle during trough levels at ZT4, but the increase was ~2× greater with exercise. Exercise at ZT15 increased 2-HB concentration ~3–5× beyond the normal peak, but levels returned to baseline within 4 h. To gain insight into relative tissue 2-HB uptake and release, we examined our A/V data. Net release by liver remained significant under all conditions, except for ZT15 exercise, when systemic 2-HB levels were highest (Figure 7D). Muscle net uptake of 2-HB was significant only under ZT3 sedentary conditions, when systemic levels were lowest.

To investigate the role of 2-HB as a signaling molecule, we administered deuterated 2-HB to mice at different doses and times of day (Figure 7E). We collected tissues and monitored 2-HB biodistribution and its impact on metabolism using matrix-assisted laser desorption/ionization mass spectrometry (MALDI-MS) imaging (Kunzke et al., 2020; Prade et al., 2020). Exogenous 2-HB (*m/z* 106.0589) was detected in liver and muscle in a dose- and time-dependent manner (Figures 7F–7I, S7A, and S7B). Liver and muscle showed similar uptake of 2-HB regardless of the time of day, but exogenous 2-HB remained elevated 2 h after injection only at ZT15. We identified significantly associated metabolites that correlated with exogenous 2-HB (Figures S7C and S7D; Data S7), including 106 liver and 127 muscle metabolites mostly involved in AA, sugar, and nucleotide metabolism.

To investigate a role for 2-HB in systemic metabolism, we administered unlabeled 2-HB to mice and monitored energy expenditure (EE) and respiratory exchange ratio (RER) by indirect calorimetry (Figure 7J). The higher dose (10 mmol/kg) acutely and transiently suppressed EE ~30 min after injection (Figure 7K). This effect was greater during the dark phase when circadian EE is at its highest (Dyar et al., 2018a). RER dropped acutely at night (Figure 7L) and remained low for several hours, suggesting an abrupt and persistent shift from glucose oxidation toward lipid utilization, as occurs during the light phase when mice are fasting. In support of our interpretation that 2-HB suppresses systemic glucose utilization, blood glucose was elevated 60 min after injection at ZT3 and ZT15 (Figure 7M). Thus, time- and exercise-dependent metabolites like 2-HB might communicate energy status under conditions of energy stress and impact tissue metabolism and systemic energy homeostasis.

## DISCUSSION

This resource adds spatiotemporal insights about the relative effects of exercise on tissue and systemic metabolism and

temporal perspectives about the relative impact of performing exercise at different times of the day. The cross-tissue correlations highlight robust metabolic crosstalk between muscle and liver upon exercise in a time-dependent manner, with early active phase exercise at ZT15 having a greater impact on muscle-liver coordination. The liver plays an essential role as an energy producer during fasting and exercise, with major roles in glycogenolysis, gluconeogenesis, lipolysis, and ketogenesis (Rui, 2014; Warner et al., 2020). During early rest phase exercise at ZT3, when hepatic energy stores are enriched, the liver is primarily committed to energy metabolite production via glycogen and lipid degradation for skeletal muscle. Conversely, during early active phase exercise at ZT15, when hepatic glycogen content is reduced, skeletal muscle requires alternative energy sources. We observed reduced glucose in muscle and liver, lipolysis in WAT, and systemic activation of ketone body metabolism and AA breakdown upon exercise at ZT15. This local energy demand in skeletal muscle, coupled with temporal variations of hepatic glycogen storage and feeding-fasting cycles, appears to result in a tighter metabolic coordination between tissues. Future studies examining synergistic effects between nutritional state and exercise are warranted to ascertain which factors are more prominent for the time-of-day-dependent impact of exercise: fed/fasted cycles or circadian cycles.

Several metabolites act as stimuli for cellular energy sensors and signaling molecules, thus causing adaptive rewiring of signaling pathways and transcriptional networks (Dai et al., 2020). Metabolites and energy sensors can directly regulate circadian clock function (Nakahata et al., 2009; Ramsey et al., 2009). Activation of the energy sensor AMPK directly phosphorylates and destabilizes circadian transcriptional repressors CRY1/2, leading to circadian and gluconeogenic gene reprogramming (Lamia et al., 2009). Our study revealed a time- and muscle-specific impact of exercise on the accumulation of 5'-AMP, simultaneously leading to muscle-specific activation of AMPK. Additional exercise-stimulated molecules transduce metabolic information and mediate circadian reprogramming, including histone modifiers (SIRT1, HDACs) and transcription factors (HIF1 $\alpha$ , GR, PPARs) (Adamovich et al., 2017; Guan et al., 2018; Peek et al., 2017; Quagliarini et al., 2019). Treadmill exercise in mice and electrical stimulation of cultured muscle cells can differentially advance or delay the circadian clock phase depending on the time of intervention (Kemler et al., 2020). Thus, exercise may reset misaligned muscle clocks if timed appropriately, for example, under fasted conditions. Our resource can be further mined for additional information about potential clock modifiers and can serve as a first step toward identifying the full

(C) Heatmap displaying A/V metabolite dynamics.

(D) Venn diagrams and relative class distribution of altered A/V metabolites (adjusted  $p < 0.05$ , paired  $t$  test).

(E) Muscle-liver metabolite correlations according to condition, time, and relative tissue uptake/release. Outer ring designates tissue. Second inner ring is colored according to metabolite class. Red bands on the third inner ring designate altered A/V metabolites (adjusted  $p < 0.05$ , paired  $t$  test), while the innermost ring designates relative tissue uptake (green) or release (purple) for each metabolite. Ribbons connecting metabolite inter-tissue classes refer to correlations between metabolites from Figure 4A. Ribbon color refers to correlation coefficient sign (red, positive; blue, negative). Each link refers to a correlated metabolite pair.

(F–I) Boxplots and relative A/V differences of selected metabolites ( $n = 6$ ; adjusted  $*p < 0.05$ ,  $**p < 0.01$ , and  $***p < 0.001$ , paired  $t$  test; horizontal lines of boxes indicate the median, size of the boxes reflects upper and lower quartiles, whiskers are minimum and maximum values, and dashed lines connect A/V data from individual mice).

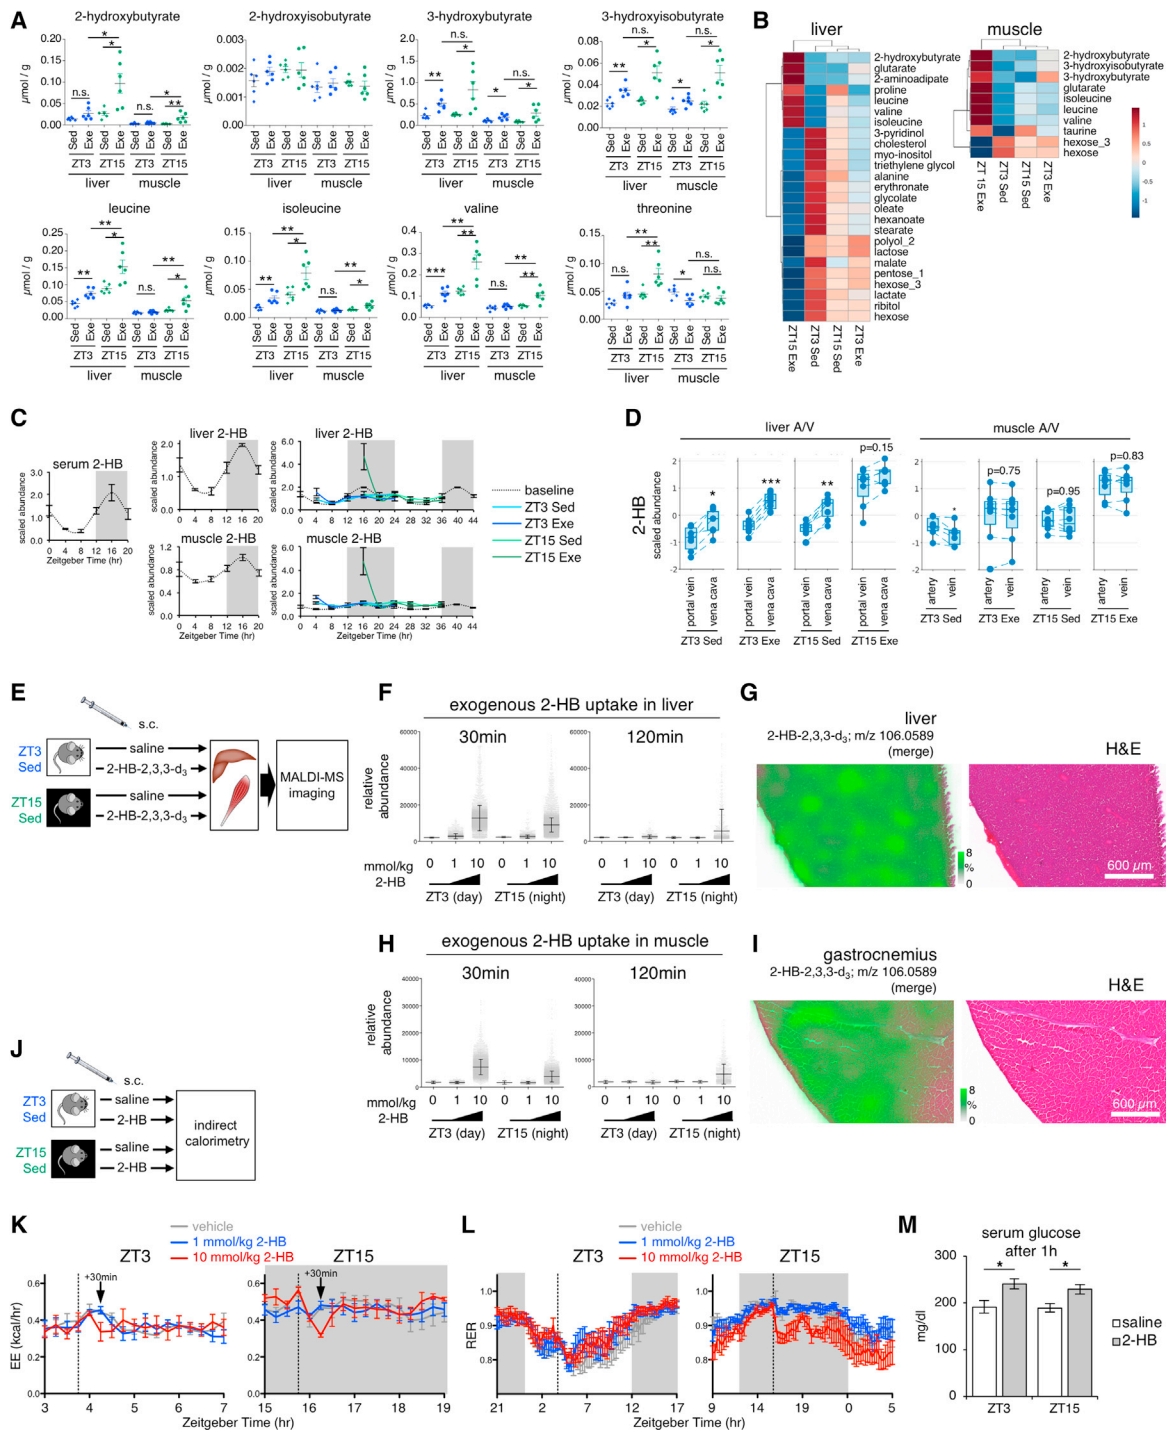

**Figure 7. Validation of 2-hydroxybutyrate (2-HB) as a time-dependent exerkin**

(A) Quantification of selected metabolites by targeted gas chromatography mass spectrometry using spiked internal standards ( $n = 6$ ; n.s., not significant,  $*p < 0.05$ ,  $**p < 0.01$ , and  $***p < 0.001$ , unpaired two-tailed  $t$  test).

(B) Heatmap of targeted metabolites showing top 25 (liver) and 10 (muscle) most significant features detected by PCA plot.

(C) Diurnal variations of 2-hydroxybutyrate (2-HB) (mean  $\pm$  SEM;  $n = 5-6$ ; baseline data derived from [Dyar et al. \(2018b\)](#)).

(D) Boxplots and relative A/V differences of 2-HB ( $n = 6$ ; adjusted  $*p < 0.05$ ,  $**p < 0.01$ , and  $***p < 0.001$ , paired  $t$  test; horizontal lines of boxes indicate median, size of boxes reflects upper and lower quartiles, whiskers are minimum and maximum values, and dashed lines connect A/V data from individual mice).

(E) Study design for MALDI-MS imaging validation using deuterated 2-HB. s.c., subcutaneous.

(F) Quantification of exogenous 2-HB (mean pixel intensity  $\pm$  SEM).

(G) Liver section showing exogenous 2-HB 30 min after injection (10 mmol/kg) at ZT15.

(legend continued on next page)



complement of tissue and systemic metabolite messengers mediating clock entrainment.

By examining tissues in a physiological context, our multitissue metabolomics atlas can shed light on the time and tissue dependence of exerkinases (Murphy et al., 2020). A limitation of our study is the timing of sample collection, as peak exerkinase production and tissue distribution may be outside of the time intervals we explored. Future studies implementing different modes of exercise, higher temporal resolution, or additional arteriovenous sampling of exerkinase-producing and target tissues will provide further physiological context. Nevertheless, we found exerkinases present in different tissues in a time- and context-dependent manner. Additional work is needed to clarify the relative physiological importance of these exerkinases, as well as tissue specificity, and how they communicate metabolic state between tissues. Our resource can serve as a starting point by indicating where exerkinases may first arise and when their presence may be most physiologically relevant. As new metabolite exerkinases are identified, our dataset can be revisited to test and explore possible interactions.

We identified 2-HB as an exercise-induced metabolite that may reflect the cytosolic redox state and energy stress at a systemic level. 2-HB levels were elevated in all tissues but only after early active phase exercise at ZT15. Selective accumulation of 2-HB indicates exercise at ZT15 evoked systemic metabolic stress. Normally considered a byproduct of GSH production or threonine catabolism, 2-HB also accumulates when mitochondrial metabolism of its precursor 2-KB is impaired (Miyazaki et al., 2015) or in response to an elevated NADH/NAD<sup>+</sup> ratio due to increased lipid oxidation. In this context, 2-KB can serve as an electron acceptor, forming 2-HB and regenerating NAD<sup>+</sup> through oxidation of cytosolic NADH by LDH (Gall et al., 2010; Landaas, 1975; Lord and Bralley, 2008; Miyazaki et al., 2015). 2-HB is a biomarker of cardiometabolic traits, mitochondrial dysfunction, lactic acidosis, ketoacidosis, prolonged fasting, and the maintenance of redox homeostasis and cell survival under stressed conditions (Gall et al., 2010; Goodman et al., 2020; Hsu et al., 2020; Liu et al., 2018; Thompson Legault et al., 2015). We previously identified 2-HB as a 24 h oscillating metabolite in skeletal muscle, liver, and serum (Dyar et al., 2018b). We report that circulating (exogenous) 2-HB transiently reduced EE and altered fuel use in a time-dependent manner. This resulted in increased glycemia and changes in liver and muscle metabolism. Thus, 2-HB may limit glucose utilization during energy stress and possibly clarify its strong association with type 2 diabetes risk.

In conclusion, this resource adds essential perspectives regarding the time-of-day-specific effects of exercise on systemic metabolism and tissue crosstalk. The production and consumption of skeletal muscle and liver metabolites during exercise changes according to the time of day, with 2-HB contributing as a systemic “exerkinase” during exercise. This atlas will serve to deepen the understanding of the pleiotropic effects

of exercise and uncover mechanistic insights to maximize the benefits of exercise on metabolic health.

### Limitations of study

In this study, we did not specifically consider the impact of sex, age, or metabolic disease in assessing the effects of exercise on systemic metabolism and tissue crosstalk. Our study was limited to a mouse model subjected to treadmill running, and results in humans, as well as the response to different exercise modalities, may vary. Although we assessed co-incident changes in metabolite levels in seven tissues and serum, as well as A/V differences in the liver and hindlimb muscle in response to acute exercise, future studies using tracer approaches will be useful to fully resolve the dynamic “metabolic circuitry” and “tissue crosstalk” in the whole organism.

### STAR★METHODS

Detailed methods are provided in the online version of this paper and include the following:

- KEY RESOURCES TABLE
- RESOURCE AVAILABILITY
  - Lead Contact
  - Materials Availability
  - Data and Code Availability
- EXPERIMENTAL MODEL AND SUBJECT DETAILS
- METHOD DETAILS
  - Animals, Exercise, and Sample Collection
  - Global Metabolomics Profiling
  - Targeted Gas Chromatography Mass Spectrometry (GC-MS)
  - In Vivo Administration of 2-Hydroxybutyrate (2-HB)
  - Matrix-Assisted Laser Desorption/Ionization Mass Spectrometry (MALDI-MS) Imaging
  - Real-Time Quantitative Polymerase Chain Reaction (Real-Time qPCR)
  - Western Blot
  - Myotube Contraction and Targeted Liquid Chromatography Mass Spectrometry (LC-MS)
- QUANTIFICATION AND STATISTICAL ANALYSIS
  - Statistical Analysis
  - MetaboAnalyst
  - Metabolite Correlation and Network Statistics
  - Arterial and Venous (A/V) Differences
  - KEGG Enrichment Analysis
  - Data Processing and Quantification for Targeted GC-MS

### SUPPLEMENTAL INFORMATION

Supplemental information can be found online at <https://doi.org/10.1016/j.cmet.2021.12.016>.

(H) Quantification of exogenous 2-HB (mean pixel intensity ± SEM).

(I) Muscle section (gastrocnemius) showing exogenous 2-HB 30 min after injection (10 mmol/kg) at ZT3.

(J) Study design for indirect calorimetry using unlabeled 2-HB. s.c., subcutaneous.

(K and L) Effects of timed 2-HB administration on energy expenditure (EE, K) and respiratory exchange ratio (RER, L) measured at 23°C. n = 4–5; mean ± SEM.

(M) Effects of timed 2-HB administration (10 mmol/kg) on glycemia (mean ± SEM; n = 4–6; \*p < 0.05, unpaired two-tailed t test).



## ACKNOWLEDGMENTS

We are grieved by the tragic loss of our friend and colleague, Paolo Sassone-Corsi. His generous guidance and insightful intellectual contributions were indispensable for this study. We thank Uyen Thao Nguyen, Priya Ramamoorthy, and Tom Vojko (Metabolon) for technical and statistical support. This study was supported by the Novo Nordisk Foundation (NNF14OC0011493 and NNF17OC0030088), Knut and Alice Wallenberg Foundation (2018.0094), Swedish Diabetes Foundation (DIA2018-357), Swedish Research Council (2015-00165), Swedish Research Council for Sport Science (P2020-0064), National Institute of Health, Institut National de la Sante et Recherche Medicale (INSERM), and Novo Nordisk Foundation Center for Basic Metabolic Research at the University of Copenhagen (NNF18CC0034900). S.S. is supported by the Brain & Behavioral Research Foundation (NARSAD Young Investigator grant 28681). K.A.D. is supported by ExNet-0041-Phase2-3 (SyNergy-HMGU) through the Initiative and Network Fund of the Helmholtz Association and “DZD grant 2020/21” from Deutsches Zentrum für Diabetesforschung (DZD). S.S., M. Samad, and P.B. are partly supported by the National Institute of Health (GM123558 to P.B.).

## AUTHOR CONTRIBUTIONS

S.S., K.A.D., J.T.T., A.L.B., M. Schönke, P.B., R.B., A.W., T.M., J.J.H., D.L., J.R.Z., and P.S.-C. designed experiments. S.S., K.A.D., S.P.A., A.M.E., S.L.J., K.T., T.K., V.M.P., L.S., A.L.B., and M. Schönke performed experiments. S.S., K.A.D., S.C., M. Samad, P.B., and D.L. analyzed data. S.S., K.A.D., J.T.T., D.L., and J.R.Z. prepared figures and wrote the manuscript. All authors read and approved the final version of the manuscript.

## DECLARATION OF INTERESTS

J.R.Z. is an Advisory Board member for *Cell Metabolism*. The authors declare no competing interests.

Received: September 29, 2020

Revised: November 22, 2021

Accepted: December 15, 2021

Published: January 13, 2022

## REFERENCES

- Adamovich, Y., Ladeuix, B., Golik, M., Koeners, M.P., and Asher, G. (2017). Rhythmic oxygen levels reset circadian clocks through HIF1alpha. *Cell Metab* 25, 93–101.
- Agostinelli, F., Ceglia, N., Shahbaba, B., Sassone-Corsi, P., and Baldi, P. (2016). What time is it? Deep learning approaches for circadian rhythms. *Bioinformatics* 32, i8–i17.
- Aichler, M., Borgmann, D., Krumsiek, J., Buck, A., MacDonald, P.E., Fox, J.E.M., Lyon, J., Light, P.E., Keipert, S., Jastroch, M., et al. (2017). N-acyl taurines and acylcarnitines cause an imbalance in insulin synthesis and secretion provoking beta cell dysfunction in type 2 diabetes. *Cell Metab* 25, 1334–1347.e4.
- Bartman, C.R., TeSlaa, T., and Rabinowitz, J.D. (2021). Quantitative flux analysis in mammals. *Nat. Metab.* 3, 896–908.
- Brandauer, J., Andersen, M.A., Kellezi, H., Risis, S., Frösig, C., Vienberg, S.G., and Trebbak, J.T. (2015). AMP-activated protein kinase controls exercise training- and AICAR-induced increases in SIRT3 and MnSOD. *Front. Physiol.* 6, 85.
- Brault, J.J., and Terjung, R.L. (2001). Purine salvage to adenine nucleotides in different skeletal muscle fiber types. *J. Appl. Physiol.* 91 (1985), 231–238.
- Ceglia, N., Liu, Y., Chen, S., Agostinelli, F., Eckel-Mahan, K., Sassone-Corsi, P., and Baldi, P. (2018). CircadiOmics: circadian omic web portal. *Nucleic Acids Res* 46, W157–W162.
- Chong, J., Wishart, D.S., and Xia, J. (2019). Using MetaboAnalyst 4.0 for comprehensive and integrative metabolomics data analysis. *Curr. Protoc. Bioinformatics* 68, e86.
- Dai, Z., Ramesh, V., and Locasale, J.W. (2020). The evolving metabolic landscape of chromatin biology and epigenetics. *Nat. Rev. Genet.* 21, 737–753.
- Damiola, F., Le Minh, N., Preitner, N., Kornmann, B., Fleury-Olela, F., and Schibler, U. (2000). Restricted feeding uncouples circadian oscillators in peripheral tissues from the central pacemaker in the suprachiasmatic nucleus. *Genes Dev* 14, 2950–2961.
- Diaz Marin, R., Crespo-Garcia, S., Wilson, A.M., and Sapienza, P. (2019). RELi protocol: optimization for protein extraction from white, brown and beige adipose tissues. *MethodsX* 6, 918–928.
- Dogrusoz, U., Giral, E., Cetintas, A., Civril, A., and Demir, E. (2009). A layout algorithm for undirected compound graphs. *Inf. Sci.* 179, 980–994.
- Dyar, K.A., Hubert, M.J., Mir, A.A., Ciciliot, S., Lutter, D., Greulich, F., Quagliarini, F., Kleinert, M., Fischer, K., Eichmann, T.O., et al. (2018a). Transcriptional programming of lipid and amino acid metabolism by the skeletal muscle circadian clock. *PLOS Biol* 16, e2005886.
- Dyar, K.A., Lutter, D., Artati, A., Ceglia, N.J., Liu, Y., Armenta, D., Jastroch, M., Schneider, S., de Mateo, S., Cervantes, M., et al. (2018b). Atlas of circadian metabolism reveals system-wide coordination and communication between clocks. *Cell* 174, 1571–1585.e11.
- Egan, B., and Zierath, J.R. (2013). Exercise metabolism and the molecular regulation of skeletal muscle adaptation. *Cell Metab* 17, 162–184.
- Evans, A.M., DeHaven, C.D., Barrett, T., Mitchell, M., and Milgram, E. (2009). Integrated, nontargeted ultrahigh performance liquid chromatography/electrospray ionization tandem mass spectrometry platform for the identification and relative quantification of the small-molecule complement of biological systems. *Anal. Chem.* 81, 6656–6667.
- Ezagouri, S., Zwihaft, Z., Sobel, J., Baillieux, S., Doutreleau, S., Ladeuix, B., Golik, M., Verges, S., and Asher, G. (2019). Physiological and molecular dissection of daily variance in exercise capacity. *Cell Metab* 30, 78–91.e4.
- Ford, L., Kennedy, A.D., Goodman, K.D., Pappan, K.L., Evans, A.M., Miller, L.A.D., Wulff, J.E., Wiggs, B.R., Lennon, J.J., Elsea, S., et al. (2020). Precision of a clinical metabolomics profiling platform for use in the identification of inborn errors of metabolism. *J. Appl. Lab. Med.* 5, 342–356.
- Gall, W.E., Beebe, K., Lawton, K.A., Adam, K.P., Mitchell, M.W., Nakhle, P.J., Ryals, J.A., Milburn, M.V., Nannipieri, M., Camastra, S., et al. (2010). Alpha-hydroxybutyrate is an early biomarker of insulin resistance and glucose intolerance in a nondiabetic population. *PLOS One* 5, e10883.
- Goodman, R.P., Markhard, A.L., Shah, H., Sharma, R., Skinner, O.S., Clish, C.B., Deik, A., Patgiri, A., Hsu, Y.H., Masia, R., et al. (2020). Hepatic NADH reductive stress underlies common variation in metabolic traits. *Nature* 583, 122–126.
- Guan, D., Xiong, Y., Borck, P.C., Jang, C., Doulias, P.T., Papazyan, R., Fang, B., Jiang, C., Zhang, Y., Briggs, E.R., et al. (2018). Diet-induced circadian enhancer remodeling synchronizes opposing hepatic lipid metabolic processes. *Cell* 174, 831–842.e12.
- Hartonen, M., Mattila, I., Ruskeepää, A.L., Orešič, M., and Hyötyläinen, T. (2013). Characterization of cerebrospinal fluid by comprehensive two-dimensional gas chromatography coupled to time-of-flight mass spectrometry. *J. Chromatogr. A* 1293, 142–149.
- Hatori, M., Vollmers, C., Zarrinpar, A., DiTacchio, L., Bushong, E.A., Gill, S., Leblanc, M., Chaix, A., Joens, M., Fitzpatrick, J.A., et al. (2012). Time-restricted feeding without reducing caloric intake prevents metabolic diseases in mice fed a high-fat diet. *Cell Metab* 15, 848–860.
- Hawley, J.A., Hargreaves, M., Joyner, M.J., and Zierath, J.R. (2014). Integrative biology of exercise. *Cell* 159, 738–749.
- Hawley, J.A., Sassone-Corsi, P., and Zierath, J.R. (2020). Chrono-nutrition for the prevention and treatment of obesity and type 2 diabetes: from mice to men. *Diabetologia* 63, 2253–2259.
- Hsu, Y.H., Astley, C.M., Cole, J.B., Vedantam, S., Mercader, J.M., Metspalu, A., Fischer, K., Fortney, K., Morgen, E.K., Gonzalez, C., et al. (2020). Integrating untargeted metabolomics, genetically informed causal inference, and pathway enrichment to define the obesity metabolome. *Int. J. Obes. (Lond)* 44, 1596–1606.

- Kanehisa, M., and Goto, S. (2000). KEGG: Kyoto Encyclopedia of Genes and Genomes. *Nucleic Acids Res* 28, 27–30.
- Kemler, D., Wolff, C.A., and Esser, K.A. (2020). Time-of-day dependent effects of contractile activity on the phase of the skeletal muscle clock. *J. Physiol.* 598, 3631–3644.
- Kretzschmar, M., and Müller, D. (1993). Aging, training and exercise. A review of effects on plasma glutathione and lipid peroxides. *Sports Med* 15, 196–209.
- Kunzke, T., Buck, A., Prade, V.M., Feuchtinger, A., Prokopchuk, O., Martignoni, M.E., Heisz, S., Hauner, H., Janssen, K.P., Walch, A., et al. (2020). Derangements of amino acids in cachectic skeletal muscle are caused by mitochondrial dysfunction. *J. Cachexia Sarcopenia Muscle* 11, 226–240.
- Lamia, K.A., Sachdeva, U.M., DiTacchio, L., Williams, E.C., Alvarez, J.G., Egan, D.F., Vasquez, D.S., Juguilon, H., Panda, S., Shaw, R.J., et al. (2009). AMPK regulates the circadian clock by cryptochrome phosphorylation and degradation. *Science* 326, 437–440.
- Landaas, S. (1975). The formation of 2-hydroxybutyric acid in experimental animals. *Clin. Chim. Acta* 58, 23–32.
- Liu, Y., Guo, J.Z., Liu, Y., Wang, K., Ding, W., Wang, H., Liu, X., Zhou, S., Lu, X.C., Yang, H.B., et al. (2018). Nuclear lactate dehydrogenase A senses ROS to produce alpha-hydroxybutyrate for HPV-induced cervical tumor growth. *Nat. Commun.* 9, 4429.
- Lord, R.S., and Bralley, J.A. (2008). Clinical applications of urinary organic acids. Part I: detoxification markers. *Altern. Med. Rev.* 13, 205–215.
- Lundell, L.S., Parr, E.B., Devlin, B.L., Ingerslev, L.R., Altıntaş, A., Sato, S., Sassone-Corsi, P., Barrès, R., Zierath, J.R., and Hawley, J.A. (2020). Time-restricted feeding alters lipid and amino acid metabolite rhythmicity without perturbing clock gene expression. *Nat. Commun.* 11, 4643.
- Luukkonen, P.K., Zhou, Y., Nidhina Haridas, P.A., Dwivedi, O.P., Hyötyläinen, T., Ali, A., Juuti, A., Leivonen, M., Tukiainen, T., Ahonen, L., et al. (2017). Impaired hepatic lipid synthesis from polyunsaturated fatty acids in TM6SF2 E167K variant carriers with NAFLD. *J. Hepatol.* 67, 128–136.
- Masri, S., and Sassone-Corsi, P. (2018). The emerging link between cancer, metabolism, and circadian rhythms. *Nat. Med.* 24, 1795–1803.
- Miyazaki, T., Honda, A., Ikegami, T., Iwamoto, J., Monma, T., Hirayama, T., Saito, Y., Yamashita, K., and Matsuzaki, Y. (2015). Simultaneous quantification of salivary 3-hydroxybutyrate, 3-hydroxyisobutyrate, 3-hydroxy-3-methylbutyrate, and 2-hydroxybutyrate as possible markers of amino acid and fatty acid catabolic pathways by LC-ESI-MS/MS. *Springerplus* 4, 494.
- Morville, T., Sahl, R.E., Moritz, T., Helge, J.W., and Clemmensen, C. (2020). Plasma metabolome profiling of resistance exercise and endurance exercise in humans. *Cell Rep* 33, 108554.
- Murphy, R.M., Watt, M.J., and Febbraio, M.A. (2020). Metabolic communication during exercise. *Nat. Metab.* 2, 805–816.
- Nakahata, Y., Sahar, S., Astarita, G., Kaluzova, M., and Sassone-Corsi, P. (2009). Circadian control of the NAD<sup>+</sup> salvage pathway by CLOCK-SIRT1. *Science* 324, 654–657.
- Newgard, C.B., An, J., Bain, J.R., Muehlbauer, M.J., Stevens, R.D., Lien, L.F., Haqq, A.M., Shah, S.H., Arlotto, M., Slentz, C.A., et al. (2009). A branched-chain amino acid-related metabolic signature that differentiates obese and lean humans and contributes to insulin resistance. *Cell Metab* 9, 311–326.
- Nilsen, M.S., Jersin, R.Å., Ulvik, A., Madsen, A., McCann, A., Svensson, P.A., Svensson, M.K., Nedrebo, B.G., Gudbrandsen, O.A., Tell, G.S., et al. (2020). 3-Hydroxyisobutyrate, a strong marker of insulin resistance in type 2 diabetes and obesity that modulates white and brown adipocyte metabolism. *Diabetes* 69, 1903–1916.
- Patel, V.R., Eckel-Mahan, K., Sassone-Corsi, P., and Baldi, P. (2012). CircadiOmics: integrating circadian genomics, transcriptomics, proteomics and metabolomics. *Nat. Methods* 9, 772–773.
- Peek, C.B., Levine, D.C., Cedernaes, J., Taguchi, A., Kobayashi, Y., Tsai, S.J., Bonar, N.A., McNulty, M.R., Ramsey, K.M., and Bass, J. (2017). Circadian clock interaction with HIF1 $\alpha$  mediates oxygenic metabolism and anaerobic glycolysis in skeletal muscle. *Cell Metab* 25, 86–92.
- Prade, V.M., Kunzke, T., Feuchtinger, A., Rohm, M., Luber, B., Lordick, F., Buck, A., and Walch, A. (2020). De novo discovery of metabolic heterogeneity with immunophenotype-guided imaging mass spectrometry. *Mol. Metab.* 36, 100953.
- Quagliarini, F., Mir, A.A., Balazs, K., Wierer, M., Dyar, K.A., Jouffe, C., Makris, K., Howe, J., Heinig, M., Filipp, F.V., et al. (2019). Cistronic reprogramming of the diurnal glucocorticoid hormone response by high-fat diet. *Mol. Cell* 76, 531–545.e5.
- Ramsey, K.M., Yoshino, J., Brace, C.S., Abrassart, D., Kobayashi, Y., Marcheva, B., Hong, H.K., Chong, J.L., Buhr, E.D., Lee, C., et al. (2009). Circadian clock feedback cycle through NAMPT-mediated NAD<sup>+</sup> biosynthesis. *Science* 324, 651–654.
- Rogatzki, M.J., Ferguson, B.S., Goodwin, M.L., and Gladden, L.B. (2015). Lactate is always the end product of glycolysis. *Front. Neurosci.* 9, 22.
- Rui, L. (2014). Energy metabolism in the liver. *Compr. Physiol.* 4, 177–197.
- Sato, S., Basse, A.L., Schönke, M., Chen, S., Samad, M., Altıntaş, A., Laker, R.C., Dalbram, E., Barrès, R., Baldi, P., et al. (2019). Time of exercise specifies the impact on muscle metabolic pathways and systemic energy homeostasis. *Cell Metab* 30, 92–110.e4.
- Sbodio, J.I., Snyder, S.H., and Paul, B.D. (2019). Regulators of the transsulfuration pathway. *Br. J. Pharmacol.* 176, 583–593.
- Schroeder, A.M., Truong, D., Loh, D.H., Jordan, M.C., Roos, K.P., and Colwell, C.S. (2012). Voluntary scheduled exercise alters diurnal rhythms of behaviour, physiology and gene expression in wild-type and vasoactive intestinal peptide-deficient mice. *J. Physiol.* 590, 6213–6226.
- Sen, C.K. (1998). Glutathione: A key role in skeletal muscle metabolism. In *Oxidative stress in skeletal muscle*, A.Z. Reznick, L. Packer, C.K. Sen, J.O. Holloszy, and M.J. Jackson, eds. (Birkhäuser), pp. 127–139.
- Small, L., Altıntaş, A., Laker, R.C., Ehrlich, A., Pattamaprapanont, P., Villarreal, J., Pillion, N.J., Zierath, J.R., and Barrès, R. (2020). Contraction influences Per2 gene expression in skeletal muscle through a calcium-dependent pathway. *J. Physiol.* 598, 5739–5752.
- Thompson Legault, J., Strittmatter, L., Tardif, J., Sharma, R., Tremblay-Vaillancourt, V., Aubut, C., Boucher, G., Clish, C.B., Cyr, D., Daneault, C., et al. (2015). A metabolic signature of mitochondrial dysfunction revealed through a monogenic form of Leigh syndrome. *Cell Rep* 13, 981–989.
- Trebbak, J.T., Pehmøller, C., Kristensen, J.M., Kjøbsted, R., Birk, J.B., Schjerling, P., Richter, E.A., Goodyear, L.J., and Wojtaszewski, J.F. (2014). Acute exercise and physiological insulin induce distinct phosphorylation signatures on TBC1D1 and TBC1D4 proteins in human skeletal muscle. *J. Physiol.* 592, 351–375.
- Wang, T.J., Ngo, D., Psychogios, N., Dejam, A., Larson, M.G., Vasan, R.S., Ghorbani, A., O'Sullivan, J., Cheng, S., Rhee, E.P., et al. (2013). 2-Aminoacidic acid is a biomarker for diabetes risk. *J. Clin. Invest.* 123, 4309–4317.
- Warner, S.O., Yao, M.V., Cason, R.L., and Winnick, J.J. (2020). Exercise-induced improvements to whole body glucose metabolism in type 2 diabetes: the essential role of the liver. *Front. Endocrinol. (Lausanne)* 11, 567.
- Wolff, G., and Esser, K.A. (2012). Scheduled exercise phase shifts the circadian clock in skeletal muscle. *Med. Sci. Sports Exerc.* 44, 1663–1670.

## STAR★METHODS

### KEY RESOURCES TABLE

| REAGENT or RESOURCE                                                                      | SOURCE                    | IDENTIFIER                     |
|------------------------------------------------------------------------------------------|---------------------------|--------------------------------|
| <b>Antibodies</b>                                                                        |                           |                                |
| Anti-phospho-AMPK $\alpha$                                                               | Cell Signaling Technology | Cat# 2535; RRID: AB_331250     |
| Anti-AMPK $\alpha$                                                                       | Cell Signaling Technology | Cat# 2603; RRID: AB_490795     |
| Anti-p84                                                                                 | Genetex                   | Cat# GTX70220; RRID: AB_372637 |
| Anti-Mouse IgG, HRP conjugate                                                            | EMD Millipore             | Cat# AP160P; RRID: AB_92531    |
| Anti-Rabbit IgG, HRP-linked                                                              | Cell Signaling Technology | Cat# 7074; RRID: AB_2099233    |
| <b>Chemicals, peptides, and recombinant proteins</b>                                     |                           |                                |
| Methanol; LC-MS Ultra CHROMASOLV                                                         | Honeywell                 | 14262-2L                       |
| Hexane; GC-MS SupraSolv                                                                  | Supelco                   | 1007951000                     |
| D-3-Hydroxybutyrate; Sodium ( $^{13}\text{C}_4$ )                                        | Cambridge Isotope         | CLM-3853-PK                    |
| L-Valine-d8                                                                              | Sigma-Aldrich             | 486027-1G                      |
| Palmitic acid-d31                                                                        | Cayman chemicals          | 1-800-364-9897                 |
| Succinic acid-2,2,3,3-d4                                                                 | Sigma-Aldrich             | 293075-1G                      |
| L-Glutamic acid- $^{13}\text{C}_5$ $^{15}\text{N}$                                       | Sigma-Aldrich             | 607851-250MG                   |
| 4,4-Dibromooctafluorobiphenyl                                                            | Sigma-Aldrich             | 101990-1G                      |
| 2-Hydroxybutyric acid; Sodium                                                            | Sigma-Aldrich             | 220116-5G                      |
| 2-Hydroxyisobutyric acid                                                                 | Sigma-Aldrich             | 323594-25G                     |
| 3-Hydroxybutyric acid                                                                    | Sigma-Aldrich             | 166898-1G                      |
| 3-Hydroxyisobutyric acid; Sodium                                                         | Sigma-Aldrich             | 11161-100MG                    |
| L-Leucine                                                                                | Sigma-Aldrich             | AAS18-5ML                      |
| L-Isoleucine                                                                             | Sigma-Aldrich             | AAS18-5ML                      |
| L-Valine                                                                                 | Sigma-Aldrich             | AAS18-5ML                      |
| L-Glutamic acid                                                                          | Sigma-Aldrich             | AAS18-5ML                      |
| L-Aspartic acid                                                                          | Sigma-Aldrich             | AAS18-5ML                      |
| L-Proline                                                                                | Sigma-Aldrich             | AAS18-5ML                      |
| L-Alanine                                                                                | Sigma-Aldrich             | AAS18-5ML                      |
| Oleic acid                                                                               | Cayman Chemicals          | 90260                          |
| Stearic acid                                                                             | Cayman Chemicals          | 10011298                       |
| Malic acid                                                                               | Sigma-Aldrich             | 240176-50G                     |
| Lactic acid                                                                              | Sigma-Aldrich             | L6402-1G                       |
| Methoxamine (MOX)                                                                        | Thermo Scientific         | TS-45950                       |
| N,O-Bis(trimethylsilyl)trifluoroacetamide with 1% Trimethylchlorosilane (BSTFA + 1%TMCS) | Thermo Scientific         | TS-38831                       |
| (+/-)-2-Hydroxybutyric acid-2,3,3-d3; Sodium                                             | CDN isotopes              | D-7002(lotAB-224)              |
| Indium tin oxide-coated conductive slides                                                | Bruker                    | 8237001                        |
| Poly-l-lysine                                                                            | Sigma-Aldrich             | P8920-100ML                    |
| Nonidet P-40                                                                             | Sigma-Aldrich             | 21-3277                        |
| 1,5-diaminonaphthalene (DAN)                                                             | Sigma-Aldrich             | 56451-250MG                    |
| Hematoxylin                                                                              | Leica                     | 3801698A                       |
| Eosin                                                                                    | Leica                     | 3801698D                       |
| Acetonitrile                                                                             | Sigma-Aldrich             | 34851-2.5L                     |
| TRIzol                                                                                   | ThermoFisher Scientific   | Cat# 15596026                  |
| Maxima H Minus Mastermix                                                                 | ThermoFisher Scientific   | Cat# M1662                     |
| PowerUp SYBR Master Mix                                                                  | ThermoFisher Scientific   | Cat# A25918                    |
| Protein Assay Dye Reagent                                                                | Bio-Rad Laboratories      | Cat# 500-0006                  |

(Continued on next page)

**Continued**

| REAGENT or RESOURCE                                                                            | SOURCE                                                                                    | IDENTIFIER                                  |
|------------------------------------------------------------------------------------------------|-------------------------------------------------------------------------------------------|---------------------------------------------|
| Nitrocellulose Membrane, 0.45 $\mu$ m                                                          | Bio-Rad Laboratories                                                                      | Cat# 1620115                                |
| Immobilon Western Chemiluminescent HRP substrate                                               | EMD Millipore                                                                             | Cat# WBKLS0500                              |
| cOmplete, EDTA-free Protease Inhibitor Cocktail                                                | Roche                                                                                     | Cat# 11873580001                            |
| Perchloric acid                                                                                | Sigma-Aldrich                                                                             | 244252-100ML                                |
| D-Glucose                                                                                      | Sigma-Aldrich                                                                             | G8270-1KG                                   |
| D-Mannitol                                                                                     | Sigma-Aldrich                                                                             | M4125-500G                                  |
| DMEM, high glucose                                                                             | ThermoFisher Scientific                                                                   | 11965084                                    |
| Penicillin-Streptomycin                                                                        | ThermoFisher Scientific                                                                   | 15140122                                    |
| Horse Serum                                                                                    | Sigma-Aldrich                                                                             | H1270-1L                                    |
| Fetal Bovine Serum                                                                             | ThermoFisher Scientific                                                                   | 16000                                       |
| <b>Deposited data</b>                                                                          |                                                                                           |                                             |
| Mouse skeletal muscle, sedentary, ZT3                                                          | <a href="http://circadiomics.igb.uci.edu/">http://circadiomics.igb.uci.edu/</a>           | MOUSE EXERCISE METABOLOME MORNING-SEDENTARY |
| Mouse skeletal muscle, exercise, ZT3                                                           | <a href="http://circadiomics.igb.uci.edu/">http://circadiomics.igb.uci.edu/</a>           | MOUSE EXERCISE METABOLOME MORNING-EXERCISE  |
| Mouse skeletal muscle, sedentary, ZT15                                                         | <a href="http://circadiomics.igb.uci.edu/">http://circadiomics.igb.uci.edu/</a>           | MOUSE EXERCISE METABOLOME EVENING-SEDENTARY |
| Mouse skeletal muscle, exercise, ZT15                                                          | <a href="http://circadiomics.igb.uci.edu/">http://circadiomics.igb.uci.edu/</a>           | MOUSE EXERCISE METABOLOME EVENING-EXERCISE  |
| Mouse liver, sedentary, ZT3                                                                    | <a href="http://circadiomics.igb.uci.edu/">http://circadiomics.igb.uci.edu/</a>           | MOUSE HEPATIC MORNING-SEDENTARY             |
| Mouse liver, exercise, ZT3                                                                     | <a href="http://circadiomics.igb.uci.edu/">http://circadiomics.igb.uci.edu/</a>           | MOUSE HEPATIC MORNING-EXERCISE              |
| Mouse liver, sedentary, ZT15                                                                   | <a href="http://circadiomics.igb.uci.edu/">http://circadiomics.igb.uci.edu/</a>           | MOUSE HEPATIC EVENING-SEDENTARY             |
| Mouse liver, exercise, ZT15                                                                    | <a href="http://circadiomics.igb.uci.edu/">http://circadiomics.igb.uci.edu/</a>           | MOUSE HEPATIC EVENING-EXERCISE              |
| Mouse muscle 24-hr metabolome, sedentary & exercise at ZT3 & ZT15                              | <a href="https://doi.org/10.17632/6x5vd4d5rd.1">https://doi.org/10.17632/6x5vd4d5rd.1</a> | 24h_LiverMuscle                             |
| Mouse liver 24-hr metabolome, sedentary & exercise at ZT3 & ZT15                               | <a href="https://doi.org/10.17632/6x5vd4d5rd.1">https://doi.org/10.17632/6x5vd4d5rd.1</a> | 24h_LiverMuscle                             |
| Mouse serum metabolome, sedentary & exercise, ZT3 & ZT15                                       | <a href="https://doi.org/10.17632/6x5vd4d5rd.1">https://doi.org/10.17632/6x5vd4d5rd.1</a> | TissueProfiling                             |
| Mouse heart metabolome, sedentary & exercise, ZT3 & ZT15                                       | <a href="https://doi.org/10.17632/6x5vd4d5rd.1">https://doi.org/10.17632/6x5vd4d5rd.1</a> | TissueProfiling                             |
| Mouse hypothalamus metabolome, sedentary & exercise, ZT3 & ZT15                                | <a href="https://doi.org/10.17632/6x5vd4d5rd.1">https://doi.org/10.17632/6x5vd4d5rd.1</a> | TissueProfiling                             |
| Mouse epididymal & inguinal white adipose tissue metabolomes, sedentary & exercise, ZT3 & ZT15 | <a href="https://doi.org/10.17632/6x5vd4d5rd.1">https://doi.org/10.17632/6x5vd4d5rd.1</a> | TissueProfiling                             |
| Mouse brown adipose tissue metabolome, sedentary & exercise, ZT3 & ZT15                        | <a href="https://doi.org/10.17632/6x5vd4d5rd.1">https://doi.org/10.17632/6x5vd4d5rd.1</a> | TissueProfiling                             |
| A/V metabolome, skeletal muscle, sedentary & exercise, ZT3 & ZT15                              | <a href="https://doi.org/10.17632/6x5vd4d5rd.1">https://doi.org/10.17632/6x5vd4d5rd.1</a> | AV_LiverMuscle                              |
| A/V metabolome, hindlimb arterial blood, sedentary & exercise, ZT3 & ZT15                      | <a href="https://doi.org/10.17632/6x5vd4d5rd.1">https://doi.org/10.17632/6x5vd4d5rd.1</a> | AV_LiverMuscle                              |
| A/V metabolome, hindlimb venous blood, sedentary & exercise, ZT3 & ZT15                        | <a href="https://doi.org/10.17632/6x5vd4d5rd.1">https://doi.org/10.17632/6x5vd4d5rd.1</a> | AV_LiverMuscle                              |
| A/V metabolome, liver, sedentary & exercise, ZT3 & ZT15                                        | <a href="https://doi.org/10.17632/6x5vd4d5rd.1">https://doi.org/10.17632/6x5vd4d5rd.1</a> | AV_LiverMuscle                              |
| A/V metabolome, portal vein, sedentary & exercise, ZT3 & ZT15                                  | <a href="https://doi.org/10.17632/6x5vd4d5rd.1">https://doi.org/10.17632/6x5vd4d5rd.1</a> | AV_LiverMuscle                              |
| A/V metabolome, vena cava, sedentary & exercise, ZT3 & ZT15                                    | <a href="https://doi.org/10.17632/6x5vd4d5rd.1">https://doi.org/10.17632/6x5vd4d5rd.1</a> | AV_LiverMuscle                              |
| Original Excel data sheets + WB pictures for figures                                           | N/A                                                                                       | This paper (Data S1)                        |
| Transcriptomics data                                                                           | (Sato et al., 2019)                                                                       | GEO: GSE126962                              |

(Continued on next page)



### Continued

| REAGENT or RESOURCE                                         | SOURCE                                    | IDENTIFIER                                                                                                                                                                  |
|-------------------------------------------------------------|-------------------------------------------|-----------------------------------------------------------------------------------------------------------------------------------------------------------------------------|
| <b>Experimental models: Organisms/strains</b>               |                                           |                                                                                                                                                                             |
| C57BL6/JBomTac mice                                         | Taconic Biosciences                       | N/A                                                                                                                                                                         |
| C57BL6/J mice (2-HB validation studies)                     | Janvier                                   | N/A                                                                                                                                                                         |
| C2C12 myoblasts                                             | American Type Culture Collection          | #CRL-1772                                                                                                                                                                   |
| <b>Oligonucleotides</b>                                     |                                           |                                                                                                                                                                             |
| See <a href="#">Real-time qPCR</a> section for qPCR primers | N/A                                       | N/A                                                                                                                                                                         |
| <b>Software and Algorithms</b>                              |                                           |                                                                                                                                                                             |
| Prism 7.0                                                   | GraphPad Software                         | <a href="http://www.graphpad.com">http://www.graphpad.com</a>                                                                                                               |
| Bio_Cycle                                                   | (Agostinelli et al., 2016)                | <a href="http://circadiomics.igb.uci.edu/biocyte">http://circadiomics.igb.uci.edu/biocyte</a>                                                                               |
| CircadiOmics                                                | (Ceglia et al., 2018; Patel et al., 2012) | <a href="http://circadiomics.igb.uci.edu">http://circadiomics.igb.uci.edu</a>                                                                                               |
| MATLAB and Statistics Toolbox R2020a                        | Mathworks                                 | <a href="https://www.mathworks.com/products/new_products/previous_release_overview.html">https://www.mathworks.com/products/new_products/previous_release_overview.html</a> |
| MetaboAnalyst                                               | (Chong et al., 2019)                      | <a href="https://www.metaboanalyst.ca/">https://www.metaboanalyst.ca/</a>                                                                                                   |
| Cytoscape                                                   | (Dogrusoz et al., 2009)                   | <a href="https://cytoscape.org/">https://cytoscape.org/</a>                                                                                                                 |
| <b>Other</b>                                                |                                           |                                                                                                                                                                             |
| Animal treadmill                                            | Columbus Instruments                      | Exer 3/6                                                                                                                                                                    |
| a standard rodent laboratory diet                           | Altromin                                  | Cat# 1310                                                                                                                                                                   |
| C-dish electrode system                                     | Ion-optics                                | 6-well                                                                                                                                                                      |

## RESOURCE AVAILABILITY

### Lead Contact

Further information and requests for resources and reagents should be directed to and will be fulfilled by the Lead Contact, Juleen R. Zierath ([Juleen.Zierath@ki.se](mailto:Juleen.Zierath@ki.se)).

### Materials Availability

This study did not generate new unique materials.

### Data and Code Availability

24h Metabolomics data from skeletal muscle and liver are available from CircadiOmics (Ceglia et al., 2018; Patel et al., 2012). Excel datasheets used to create all graphs in the paper and uncropped scans of all the Western blot images presented in the paper are found in [Data S1](#). Original and scaled metabolomics data can be found in [Data S2](#). Raw and processed metabolomics data have also been deposited into Mendeley Data (<https://doi.org/10.17632/6x5vd4d5rd.1>).

## EXPERIMENTAL MODEL AND SUBJECT DETAILS

Animal experiments complied with the European directive 2010/63/EU of the European Parliament and were approved by the Danish Animal Experiments Inspectorate (2012-15-2934-26 and 2015-15-0201-796). 2-HB experiments were approved by the local animal welfare authority in Germany (District government of upper Bavaria No.55.2-2532.Vet\_2-17-125). For exercise experiments, specific Pathogen Free (SPF) male C57BL6/JBomTac mice were purchased from Taconic Biosciences and maintained at the animal facilities of the University of Copenhagen, Denmark. For 2-HB validation studies, SPF male C57BL6/J mice were purchased from Janvier and maintained at the animal facilities of the Helmholtz Zentrum München.

## METHOD DETAILS

### Animals, Exercise, and Sample Collection

Mice were reared at 22±1°C with 12h light/dark cycle (light on at 6AM (ZT0) and light off at 6PM (ZT12)) and fed a standard rodent laboratory diet (#1310, Altromin, Germany) *ad libitum*. At 10-11 weeks of age, the mice were divided into two different groups of exercise or sham-exercise treatment either during the early rest phase group (ZT3) or the early active phase group (ZT15). Exercised mice in the early rest phase group were subjected to a single-bout of acute exercise for 1h at ZT3, whereas exercised mice in the early active phase group were subjected to the exercise for 1h at ZT15. Sedentary control mice for corresponding exercised mice at the different daily times were placed on a stationary treadmill for 1h (sham-exercise). The exercise protocol has been described

previously (Brandauer et al., 2015; Sato et al., 2019; Treebak et al., 2014). Briefly, the mice were subjected to a single-bout of acute treadmill running (Columbus Instruments, OH) following a 4-day acclimatization protocol as described below;

*Day 1* (15 min total; 5% incline)

For the first 5 min, mice were placed on the stationary treadmill.

Start running at 6 m/min and accelerate by 2 m/min every 2 or 3 min up to 12 m/min

*Day 2* (15 min total; 5% incline)

Start running at 6m/min and accelerate by 2 m/min every 3 min up to 14 m/min

*Day 3* (15 min total; 5% incline)

Start running at 6m/min and accelerate by 2 m/min every 2 or 3 min up to 16 m/min

*Day 4*

Rest

*Day 5* (60 min total; 5% incline)

Start running at 6 m/min and accelerate by 2 m/min every 2 min up to 16 m/min

Electrical grids forced mice to keep running for the corresponding duration of exercise.

Under isoflurane anesthesia, skeletal muscle and liver were collected 0, 4, 8, 12, 16, and 20h after 1hr of exercise or sham-exercise performed during the early rest (ZT3) or active phase (ZT15). Serum, heart, hypothalamus (HT), epididymal white adipose tissue (eWAT), inguinal WAT (iWAT), and brown adipose tissue (BAT) were collected immediately after 1hr of exercise or sham-exercise performed during the early rest (ZT3) or active phase (ZT15). All tissues were immediately snap frozen in liquid nitrogen and stored at  $-80^{\circ}\text{C}$  for subsequent use. For blood sampling across hindlimb skeletal muscles and liver, separate cohorts of 10-12-week-old SPF male C57B6/JBomTac mice were subjected to the same acute exercise or sham-exercise protocol either at ZT3 or ZT15 and then anesthetized.

#### **Arteriovenous sampling across hindlimb skeletal muscles**

Collection of venous blood from the skeletal muscle was drawn from the right common iliac vein using a 1 ml syringe and a 27 G needle. For arterial blood sampling the blood was drawn from the abdominal aorta using a catheter (BD Insyte Autoguard, 24 GA 0.75 IN, 0.7 x 19 mm, BD, Denmark). After the blood sampling, the gastrocnemius muscle was dissected and immediately snap frozen in liquid nitrogen before storage at  $-80^{\circ}$ .

#### **Blood sampling across the liver**

The blood flow from the lower extremities and other organs that feed into the vena cava, apart from the liver, was occluded by a ligature placed around the vena cava inferior and aorta above the renal veins. Blood samples were then collected from the portal vein using a 1 ml syringe and 27 G needle, and blood from liver was drawn, after opening of the thorax, through a catheter similar to the catheter used for arterial blood sampling, inserted into the inferior caval vein, via the heart, and advanced to the liver. To avoid blood flow from the upper extremities a ligature was placed around the catheter in the vena cava. The liver was dissected immediately, and the samples were snap frozen in liquid nitrogen and stored at  $-80^{\circ}\text{C}$  for subsequent use.

#### **Global Metabolomics Profiling**

Metabolomic analysis was performed by Metabolon (Durham, NC).

#### **Sample Preparation**

Samples were prepared using the automated MicroLab STAR system (Hamilton, NV). To remove protein, dissociate small molecules bound to protein or trapped in the precipitated protein matrix, and to remove chemically diverse metabolites, proteins were precipitated with methanol under vigorous shaking for 2 min (GenoGrinder, 2000, Glen Mills, NJ) followed by centrifugation. The resulting extract was divided into five fractions: two for analysis by two separate reverse phase (RP)/ultra-high-performance liquid chromatography-tandem mass spectrometry (UPLC-MS/MS) with positive ion mode electrospray ionization (ESI), one for analysis by RP/UPLC-MS/MS with negative ion mode ESL, one for analysis by HILIC/UPLC-MS/MS with negative ion mode ESI, and once sample was reserved for backup. Samples were placed briefly on a Zymark TurboVap (Caliper Life Sciences, CA) to remove the organic solvent.

#### **UPLC-MS/MS**

All methods utilized a Waters ACQUITY ultra-performance liquid chromatography and a Q-Exactive high resolution/accurate mass spectrometer (ThermoFisher Scientific) interfaced with a heated electrospray ionization (HESI-II) source and Orbitrap mass analyzer operated at 35,000 mass resolution. The sample extract was dried then reconstituted in solvents compatible to each of the four methods. Each reconstitution solvent contained a series of standards at fixed concentrations to ensure injection and chromatographic consistency. One aliquot was analyzed using acidic positive ion conditions, chromatographically optimized for more hydrophilic compounds. In this method, the extract was gradient eluted from a C18 column (Waters UPLC BEH C18-2.1x100 m, 1.7  $\mu\text{m}$ ) using water and methanol, containing 0.05% perfluoropentanoic acid (PFPA) and 0.1% formic acid. Another aliquot was also analyzed using acidic positive ion conditions, however it was chromatographically optimized for more hydrophobic compounds. In this method, the extract was gradient eluted from the same aforementioned C18 column using methanol, acetonitrile, water, 0.05% PFPA and 0.01% formic acid and was operated at an overall higher organic content. Another aliquot was analyzed using basic negative ion optimized conditions using a separate dedicated C18 column. The basic extracts were gradient eluted from the column using methanol and water, however with 6.5 mM Ammonium Bicarbonate at pH 8. The fourth aliquot was analyzed via negative ionization following elution from a HILIC column (Waters UPLC BEH Amide 2.1 x 150 mm, 1.7  $\mu\text{m}$ ) using a gradient consisting of water and acetonitrile with 10 mM Ammonium Formate, pH 10.8.

### **Data Extraction, Compound Identification, Metabolite Quantification, and Data Normalization**

Raw data were extracted, peak-identified and quality control processed using Metabolon's proprietary hardware and software (Evans et al., 2009; Ford et al., 2020). Compounds were identified by comparison to library entries of purified standards or recurrent unknown entities. Biochemical identifications are based on three criteria: retention index within a narrow retention time/index window of the proposed identification, accurate mass match to the library  $\pm$  10 ppm, and the MS/MS forward and reverse scores between the experimental data and authentic standards. The MS/MS scores are based on a comparison of the ions present in the experimental spectrum to the ions present in the library spectrum. Additional mass spectral entries have been created for structurally unnamed biochemicals, which have been identified by virtue of their recurrent nature. Peaks were quantified using area-under-the-curve. For measurements spanning multiple days, a data normalization step was performed to correct variation resulting from instrument inter-day tuning differences. All the samples in a particular tissue type were run in the same batch using the same instrument, so minimal instrument technical variation is present. Samples were run in a balanced manner using the group ID. Essentially, each compound was corrected in run-day blocks by registering the medians to equal one (1.00) and normalizing each data point proportionately. Following additional normalization (to mass extracted for BAT and hypothalamus, and to volume for serum), log transformation and imputation of missing values with the minimum observed value for each compound, Mixed Model Contrasts were used to identify biochemicals that differed significantly between groups. Imputation is applied within each sample type (muscle, liver, serum, etc.) regardless of the sampling timing and exercise condition. Imputation is applied to all the metabolites that are not detected (due to metabolites being under the threshold of detection (LOD)) in a per sample basis. If a metabolite is detected it is quantified (raw area counts) automatically. If there was only one value, it was still imputed with the minimum (this single value), but because the values would all be the same post-imputation, significance testing would not be performed on those metabolites (Missing values: 6.4% Muscle, 4.1% Serum, 4.0% Liver, 3.9% Heart, 5.0% HT, 13.1% eWAT, 5.8% iWAT, and 4.7% BAT).

### **Exclusion of metabolites related to xenobiotics**

For differential analyses of metabolites identified and changed under experimental conditions (Figures 1B–1D, S1A–S1D, and 6D), all metabolites named and categorized according to Metabolon superpathways – amino acids, carbohydrates, energy, peptide, lipid, nucleotide, cofactors and vitamins, and xenobiotics –, and unnamed metabolites were included. For subsequent metabolite classification, pathway enrichment, and metabolite correlation analyses, metabolites categorized as xenobiotics and unnamed metabolites were excluded.

### **Targeted Gas Chromatography Mass Spectrometry (GC-MS)**

Skeletal muscle (quadriceps) and liver samples collected after single-bout acute exercise or sham-exercise were used for further identification and quantification of polar metabolome biomarkers, including 2-hydroxybutyrate (2-HB) and 2-hydroxyisobutyrate (2-HIB), by targeted GC-MS. Preparation of liver and muscle tissue is based on prior methods, modified to suit the experimental design and analytical instruments (Luukkonen et al., 2017). Each tissue sample was transferred from  $-80^{\circ}\text{C}$  into a Covaris tissueTUBE (520140), immersed in liquid nitrogen, and crushed with Covaris CryoPrep impactor CP02. Around 10 to 20 mg of powdered tissue were then transferred into 1.5 ml Eppendorf tubes and used for extraction. Exact mass was measured and written down for post-processing and normalization. Cryogenically frozen tissue powder was mixed with 60  $\mu\text{l}$  of methanol containing internal standards: L-Valine-d8; 20 mg/l, Succinic acid-2,2,3,3-d4; 20 mg/l, L-Glutamic acid- $^{13}\text{C}_5$   $^{15}\text{N}$ ; 100 mg/l, D-3-hydroxybutyrate ( $^{13}\text{C}_4$ ); 10 mg/l, Palmitic acid-d31; 100 mg/l. Additional 340  $\mu\text{l}$  of methanol was added to the mixture. The suspension was vortexed and sonicated in ice-cold ultrasound bath for 15 min to facilitate metabolite extraction. After 15 min-incubation at  $4^{\circ}\text{C}$  for protein precipitation, the suspension was centrifuged for 3 min on 10,000 rpm at  $4^{\circ}\text{C}$  and 200  $\mu\text{l}$  of extract was aliquoted. Additional 50  $\mu\text{l}$  was taken to create a pooled sample dedicated for quality control. Extract was dried under a stream of nitrogen with 6 l/min flow for 45 min. Native standards of 2-HB and 2-HIB were dissolved in methanol and diluted into calibration curve series, which was used for metabolite identification and quantification. Automatic derivatization was made using Gerstel MPS robot (Hartonen et al., 2013). Mox derivatizing agent (25  $\mu\text{l}$ ) was added to dried extract followed by 1h derivatization on  $45^{\circ}\text{C}$ . In a second step, 25  $\mu\text{l}$  of BSTFA containing 1% TMCS was added and the same reaction conditions were used. Before the injection, 50  $\mu\text{l}$  of hexane containing 10 mg/l of 4,4-dibromooctafluorobiphenyl was added. Compound was used to control the precision of 1  $\mu\text{l}$  injection. Samples were analyzed using a gas chromatographer coupled with time of flight mass spectrometer (Leco Pegasus BT). Metabolites were separated on Restek Rxi 5ms column (pn:13423-6850) with Helium flow of 1.2 ml/min and  $270^{\circ}\text{C}$  inlet temperature. Temperature gradient started with  $40^{\circ}\text{C}$  where it was stable for a minute. After that, temperature was increased with a rate of  $20^{\circ}\text{C}/\text{min}$  until it reached  $340^{\circ}\text{C}$ , where it was stable for additional 3 min. Detector acquired mass spectra in scan mode, in the range from 50 to 750 Da with 10 Hz speed. To avoid solvent peak, acquisition started after 320s. MS was equipped with an EI source with standard 70eV fragmentation.

### **In Vivo Administration of 2-Hydroxybutyrate (2-HB)**

All experiments were performed on 3-month-old male C57BL/6J mice from Janvier housed at room temperature ( $23^{\circ}\text{C}$ ) under a 12h light:12h dark cycle with standard chow diet (#1310, Altromin, Germany) and water provided ad libitum. Labeled 2-HB (2,3,3-d<sub>3</sub>), unlabeled 2-HB, or vehicle (saline) were administered by subcutaneous injection at the indicated doses and times. Tissues were collected at the indicated times immediately after cervical dislocation, snap frozen in liquid nitrogen and stored at  $-80^{\circ}\text{C}$  for subsequent use. Serum was collected from trunk blood immediately chilled on ice, centrifuged at 1500 g and  $4^{\circ}\text{C}$ , and stored at  $-80^{\circ}\text{C}$ . Serum glucose was determined by AU480 Chemistry Analyzer (Beckman Coulter). Energy expenditure and respiratory exchange ratio were assessed using a combined indirect calorimetry system (TSE Systems).

### Matrix-Assisted Laser Desorption/Ionization Mass Spectrometry (MALDI-MS) Imaging

Frozen tissue samples were cryosectioned into 12  $\mu\text{m}$  sections using Microm560 (Microm International, Walldorf, Germany) and thaw mounted onto indium tin oxide-coated conductive slides (Bruker Daltonics, Bremen, Germany). The slides were pre-treated with 1:1 poly-L-lysine (Sigma-Aldrich, Munich, Germany) and 0.1% Nonidet P-40 (Sigma) before mounting. Measurements were conducted, as described (Aichler et al., 2017; Kunzke et al., 2020). Briefly, the samples were covered with 10 mg/ml 1,5-diaminonaphthalene (DAN) matrix (Sigma-Aldrich) in 70% acetonitrile, using a SunCollect sprayer (Sunchrom, Friedrichsdorf, Germany). Data were acquired in negative ion mode using a Bruker Solarix 7.0 T Fourier-transform ion cyclotron resonance (FTICR) mass spectrometer (Bruker Daltonics) over a mass range of 50–650  $m/z$  and at a lateral resolution of 60  $\mu\text{m}$ . SCiLS Lab (v. 2021b Pro) was used for peak picking and exported imzML files were processed with SPACiAL (Prade et al., 2020). After acquisition of the mass spectrometry data, the matrix was removed with 70% ethanol, and the tissue sections were stained with haematoxylin and eosin, coverslipped, scanned with a Mirax desk slide scanner (Zeiss, Göttingen, Germany) using a 20 $\times$  magnification objective, and co-registered with the respective mass spectrometry imaging data. Metabolites were annotated with the Kyoto Encyclopedia of Genes and Genomes (KEGG) (Kanehisa and Goto, 2000) and Compass IsotopePattern (Bruker), allowing a mass error of 4 ppm, M-H adducts, M-H<sub>2</sub>O-H adducts, M+Na-2H adducts, M+K-2H adducts, and M+Cl adducts.

### Real-Time Quantitative Polymerase Chain Reaction (Real-Time qPCR)

Using TRIzol reagent (ThermoFisher Scientific), total RNA was extracted from liver collected immediately after exercise or sham-exercise at each ZT3 and ZT15. One  $\mu\text{g}$  of total RNA was reverse transcribed to cDNA using Maxima H Minus Mastermix (ThermoFisher Scientific). cDNA was applied to real-time qPCR using PowerUp SYBR Master Mix (ThermoFisher Scientific). Gene expression was normalized to 18S rRNA. Primers used for qPCR are listed below;

mGys2 For 5'-ccagacaaattccacctagagc-3', Rev 5'-gggcctgggatacttaaacg-3'  
mPygl For 5'-ccagagtgcctaccaccaat-3', Rev 5'-ccaccacaaagactcctgtttc-3'  
mG6pc For 5'-tctgtcccgatctaccttg-3', Rev 5'-gaaagttcagccacagcaa-3'  
mPck1 For 5'-tgttgctggctctcactgac-3', Rev 5'-gggaacctggcgttgaatgc-3'  
mHk2 For 5'-caactccggatgggacag-3', Rev 5'-cacacggaagttggtctc-3'  
mPdk4 For 5'-gagctggtatattccagagcctgat-3', Rev 5'-cgaacttgaccagcgtgtct-3'  
mPpara For 5'-acaaggcctcagggtacca-3', Rev 5'-gccgaaagaagcccttacag-3'  
mPpard For 5'-gtatgcgatgggactcac-3', Rev 5'-gtctgagcgcagatggact-3'  
mAcsc1 For 5'-ccaccaagatcgccaagta-3', Rev 5'-atctggtttggggagacg-3'  
mSlc16a1 For 5'-ggatatacatctataatgttgctgtc-3', Rev 5'-gctgccgtatttaccacaa-3'  
mPnpla2 For 5'-gtgcatatgcccttctctgt-3', Rev 5'-ttctgatctctccaaggttct-3'  
mPlin4 For 5'-ggactacaaacagcaacagacc-3', Rev 5'-tctgtgagttggtggacactt-3'  
18S rRNA For 5'-cgccgctagaggtgaaattc-3', Rev 5'-cgaacctccgacttctgt-3'.

### Western Blot

Whole cell lysates were extracted from skeletal muscle, liver, and heart using the buffer containing 137 mM NaCl, 2.7 mM KCl, 1 mM MgCl<sub>2</sub>, 5 mM Na<sub>4</sub>P<sub>2</sub>O<sub>7</sub>, 10 mM NaF, 1% Triton X-100, 10% glycerol, 20 mM Tris pH7.8, 1 mM EDTA, 0.2 mM PMSF, 0.5 mM Na<sub>3</sub>VO<sub>4</sub>, 10 mM NAM, 0.33  $\mu\text{M}$  TSA, and 1X protein inhibitor cocktail (Roche). Whole cell lysates were extracted from eWAT as described (Diaz Marin et al., 2019). Twenty  $\mu\text{g}$  of lysate per sample was applied to SDS-PAGE. Anti-phospho AMPK $\alpha$  (Cell Signaling Technology, 2535), anti-AMPK $\alpha$  (Cell Signaling Technology, 2603), and anti-p84 (Genetex, GTX70220) antibodies were used for Western blot analyses.

### Myotube Contraction and Targeted Liquid Chromatography Mass Spectrometry (LC-MS)

C2C12 myoblasts (#CRL-1772; American Type Culture Collection) were seeded into 35 mm at a density of 10<sup>5</sup> cells/well, cultured in Dulbecco's Modified Eagle's Medium (DMEM, 25 mM glucose) supplemented with 10% fetal bovine serum (FBS), and 1% penicillin-streptomycin at 37°C, 5% CO<sub>2</sub>. After reaching ~90% confluence, differentiation was induced by switching from 10% FBS to 2% horse serum. Differentiation medium was changed every 2nd day until fully differentiated myotubes could be visualized under a light microscope (5–6 days). On day 6 of differentiation, cells were washed in warm PBS and the media was changed to a standard Krebs Ringer Phosphate buffer supplemented with 0.2% BSA and 20 mM glucose or 20 mM mannitol (used to prevent osmotic stress) for a total of 6h. Electrical pulse stimulation (EPS) was applied to the cells in culture to induce contraction in the last 3 hours of incubation using the Ion-optics system C-dish electrode in a six-well format. The EPS protocol consisted of 3h with 1 Hz frequency, 2 ms in duration and 30 V. Immediately after the end of the contraction protocol the cells were transferred to ice, washed with cold PBS and metabolites were extracted and the cells scraped in 150  $\mu\text{l}$  of ice-cold 0.5 M perchloric acid. Samples were vortexed for 20s and then centrifuged at 14,000  $g$  for 3 min at 4°C and then 100  $\mu\text{l}$  of supernatant was neutralized with the addition of 25  $\mu\text{l}$  of 2.3M KHCO<sub>3</sub>, centrifuged again at 14,000  $g$  for 3 min at 4°C, and then 25  $\mu\text{l}$  of the supernatant was transferred to an HPLC tube containing 25  $\mu\text{l}$  of HPLC-grade methanol. LC-MS was performed on an ultra-performance liquid chromatography-tandem mass spectrometer (UPLC-MS-MS, ACQUITY UPLC coupled with Xevo TQ-XS, Waters Corporation, Milford, Massachusetts). The



auto-sampler was set at 6°C and the column ACQUITY premier BEH Amide 1.7 μm VanGuard FIT 2.1 x 150 mm (Waters Corporation, Milford) temperature was maintained at 40°C. The total run time was 19 min at a flow rate of 200 μL/min. Initially, the gradient started with a 1.5 min at 90% mobile phase B (Acetonitrile/H<sub>2</sub>O, 90/10 (v/v), 10 mM ammonium acetate, pH at 9), and then rising to 50% mobile phase A (H<sub>2</sub>O, 10 mM ammonium acetate, pH at 9) over the next 9.5 min. Mobile phase A was quickly increased to 65% in 0.5 min and maintained for 4 min and finally equilibrated to the initial conditions for 4 min. Both mobile phases were spiked with 5 μM methylenediphosphonic acid as a deactivator additive. An injection volume of 1 μL of sample extract was used. MRM transitions 268.1 > 136 and 348 > 136 were used for quantification for Adenosine and AMP respectively. Calibration curves of Adenosine (0.05 nM to 1 μM) and AMP (0.5 nM to 10 μM) were carried out for quantification. Limits of determination (LOD) were 5 nM for both compounds, defined by signal to noise ratio (S/N) > 3. The relative standard deviation (RSD) for both compounds was below 10 %. C2C12 experiments were performed twice on separate days and n number indicates individual wells.

## QUANTIFICATION AND STATISTICAL ANALYSIS

### Statistical Analysis

For the statistical analysis of metabolite levels among different experimental conditions, two-way ANOVA (serum, heart, hypothalamus, eWAT, iWAT, and BAT) and three-way ANOVA (muscle and liver) Model Contrasts were used to identify biochemicals that differed significantly between experimental groups, following normalization, log transformation and imputation of missing values, if any, with the minimum observed value for each compound. Differences between two groups were considered statistically significant for  $p < 0.05$ . Data are presented as mean ± SEM. Storey's q value method for estimating the False Discovery Rate (FDR) was used to correct for multiple testing. For the statistical analyses of gene expression and glycogen content, data are presented as mean ± SEM and were analyzed by Two-way ANOVA with Sidak's post hoc testing where applicable (Prism 7.0). For the analysis of rhythmic metabolites in liver, the nonparametric test Bio\_Cycle was used incorporating a window of 20-28 h for the determination of circadian periodicity (Agostinelli et al., 2016), including amplitude and phase analysis. A gene or metabolite was considered circadian based on a p value cutoff of 0.05. For single group comparisons, an unpaired two-tailed t test with a p value cutoff of 0.05 was used.

### MetaboAnalyst

Metabolites positively or negatively associated with 2-HB were determined according to Spearman correlation adjusted  $p < 0.05$  after multiple testing by Benjamini-Hochberg. Enrichment analysis of 2-HB associated metabolites was performed using MetaboAnalyst (Chong et al., 2019) with default parameters and Kyoto Encyclopedia of Genes and Genomes (KEGG) IDs. Quantitative Enrichment Analysis was performed via the Enrichment Analysis module using the pathway based KEGG metabolite set library (84 metabolite sets based on human metabolic pathways) or the main-class chemical structures library (464 main chemical class metabolite sets).

### Metabolite Correlation and Network Statistics

Metabolite data were auto scaled before correlation analysis. Pearson's correlation coefficient was calculated on log normalized data to estimate inter- and intra-tissue metabolite pair correlations. Networks are based on metabolite-pair correlations with an estimated  $p$  value < 0.0001. Undirected networks were analyzed and visualized using the Compound Spring Embedder (CoSE) layout of Cytoscape (Dogrusoz et al., 2009). Node degree refers to the number of connected neighbor nodes/metabolites. Node closeness was calculated using MATLAB 2020a centrality function as the reciprocal of the sum of the length of the shortest paths between the node and all other nodes in the graph.

### Arterial and Venous (A/V) Differences

Peak area data were batch normalized. Serum data were normalized to volume extracted. Metabolite values greater than 4 times the standard deviation were considered as outliers and removed. Metabolites with more than 50% missing data were removed from the data. Data were log normalized and missing values were imputed using k-nearest-neighbor. Samples were auto-scaled. Significant tissue uptake or release was estimated using a paired t test for serum A/V data. Log-Fold change of tissue uptake/release was calculated based on replicate median values.

### KEGG Enrichment Analysis

Metabolites for enrichment were selected based on ANOVA test for differences between groups (exercise vs sedentary, tissue profiling) or paired t test for significant uptake/release (A/V profiling),  $p$  values < 0.05. Metabolites were annotated based on Metabolon KEGG annotation. KEGG pathway definitions were downloaded from <https://www.genome.jp>, release 98.0. KEGG pathway significance was estimated using a hypergeometrical distribution test.

### Data Processing and Quantification for Targeted GC-MS

Raw files were converted into centroid mode and exported as netCDF files. Metabolites without available standard were identified based on the spectral similarity and retention index criteria using in-house and NIST 17 spectral libraries. 0.85 of similarity score and less than 30 RI difference was used for successful annotation. Sugars with multiple hits were assigned to their structural group. Using spectral similarity of injected standards and putatively identified metabolites, we determined characteristic quantifier ions

and retention time. Characteristic peaks were extracted and integrated using in-house script developed by Swedish Metabolome Center. Extraction was performed in targeted manner. Metabolites with calibration curves were normalized with group specific internal standards: L-Valine-d8, Succinic acid-2,2,3,3-d4, L-Glutamic acid- $^{13}\text{C}_5^{15}\text{N}$ , D-3-hydroxybutyrate ( $^{13}\text{C}_4$ ) and Palmitic acid-d31, and compared with dilution series of native standards. Putatively identified metabolites were normalized to injection standard: 4,4-Dibromooctafluorobiphenyl. At the end, concentrations and peak areas were normalized to the initial amount of tissue. Results were expressed as  $\mu\text{mol}$  of compound in g of tissue for calibration curve covered metabolites and as normalized areas for putatively identified metabolites.

**Cell Metabolism, Volume 34**

**Supplemental information**

**Atlas of exercise metabolism**

**reveals time-dependent signatures**

**of metabolic homeostasis**

**Shogo Sato, Kenneth A. Dyar, Jonas T. Treebak, Sara L. Jepsen, Amy M. Ehrlich, Stephen P. Ashcroft, Kajetan Trost, Thomas Kunzke, Verena M. Prade, Lewin Small, Astrid Linde Basse, Milena Schönke, Siwei Chen, Muntaha Samad, Pierre Baldi, Romain Barrès, Axel Walch, Thomas Moritz, Jens J. Holst, Dominik Lutter, Juleen R. Zierath, and Paolo Sassone-Corsi**

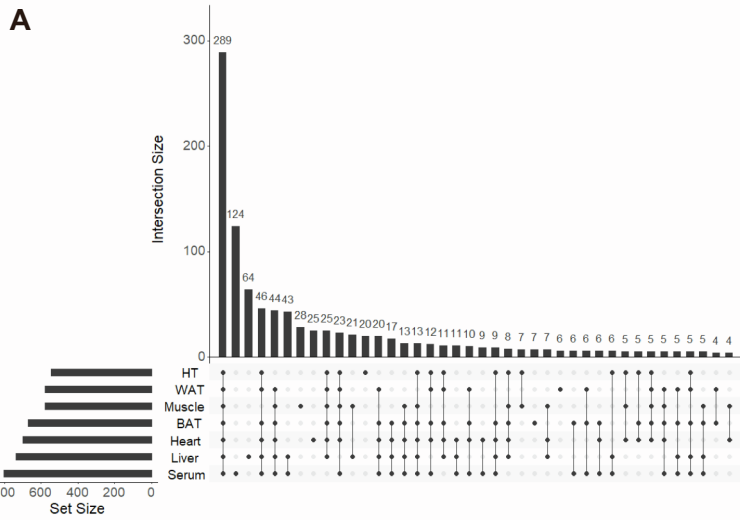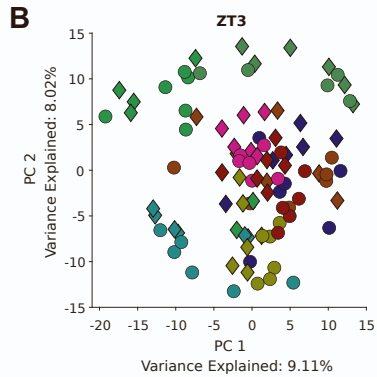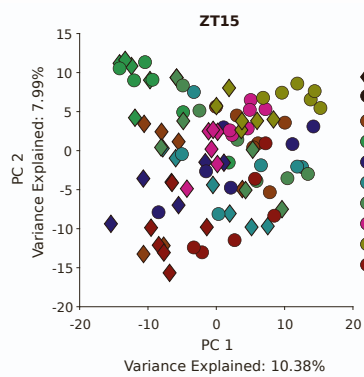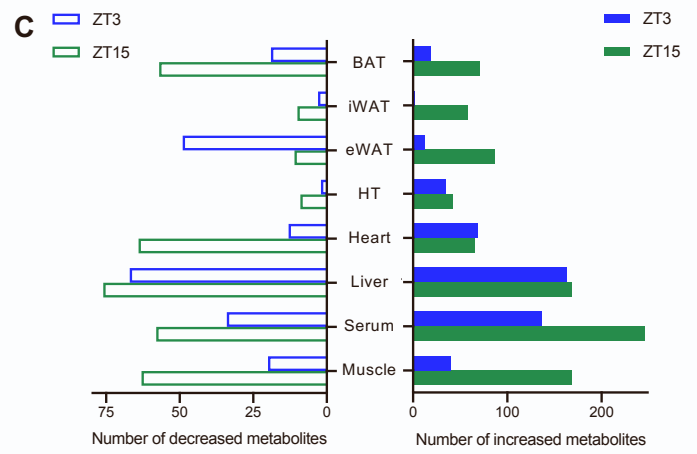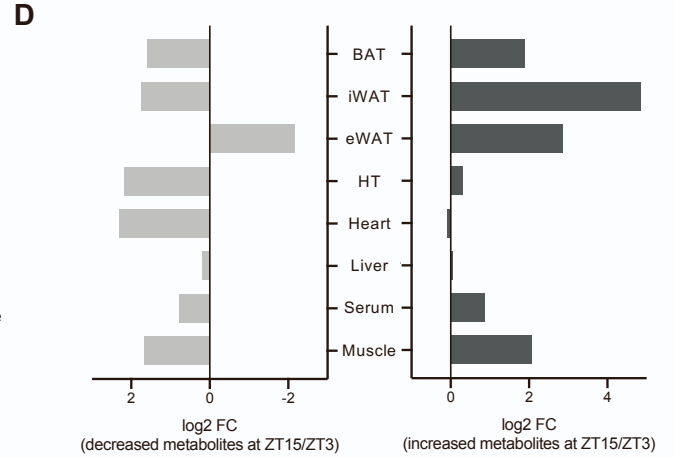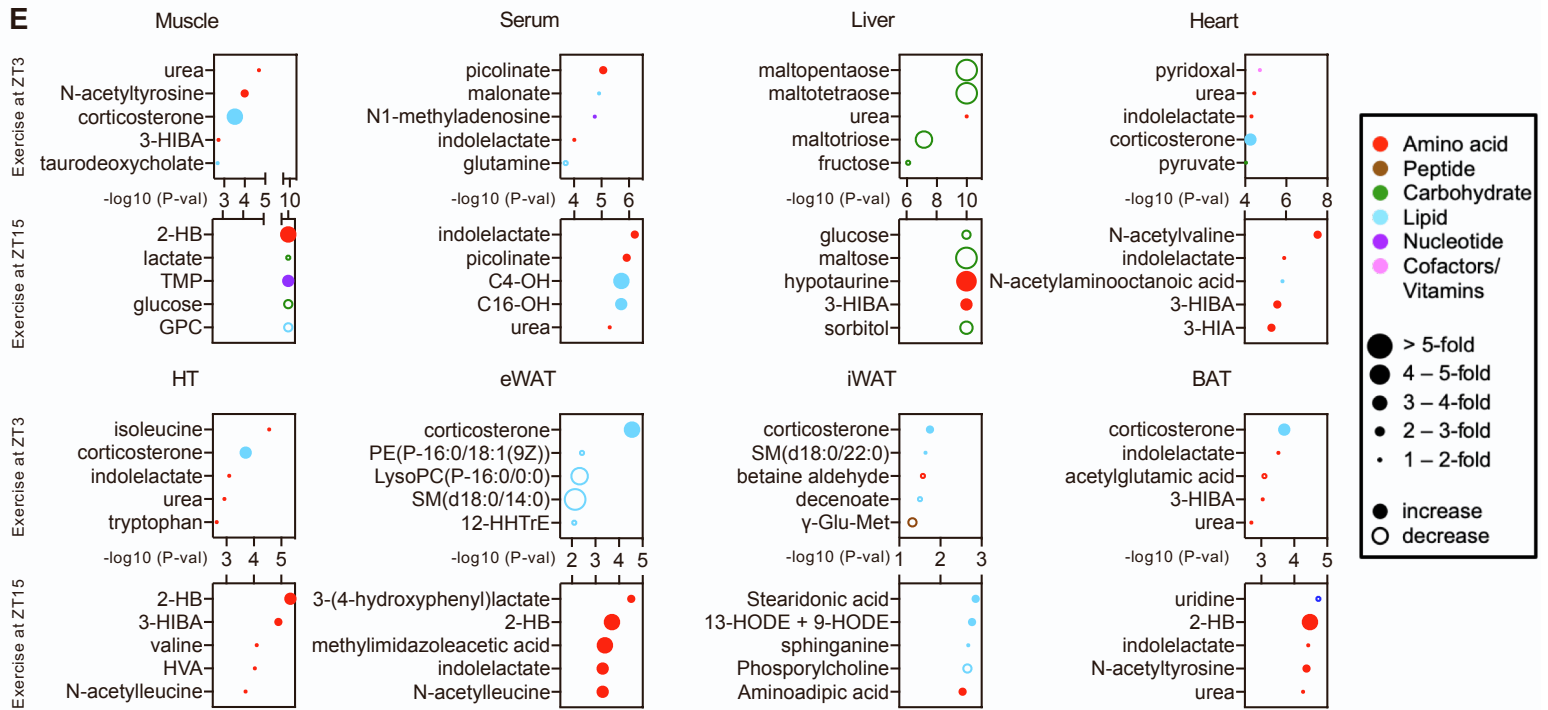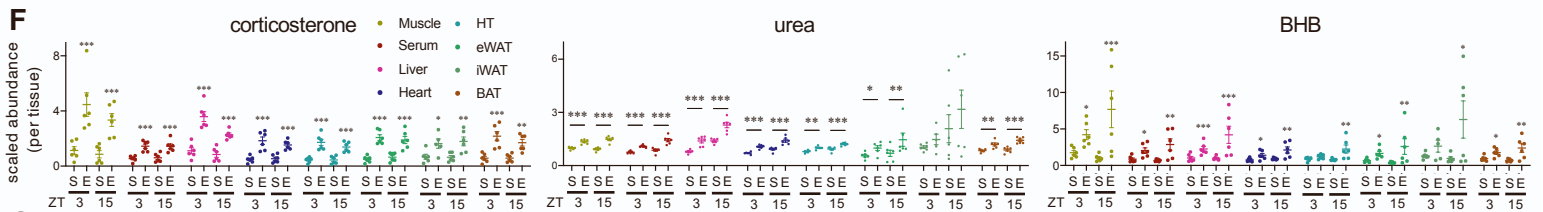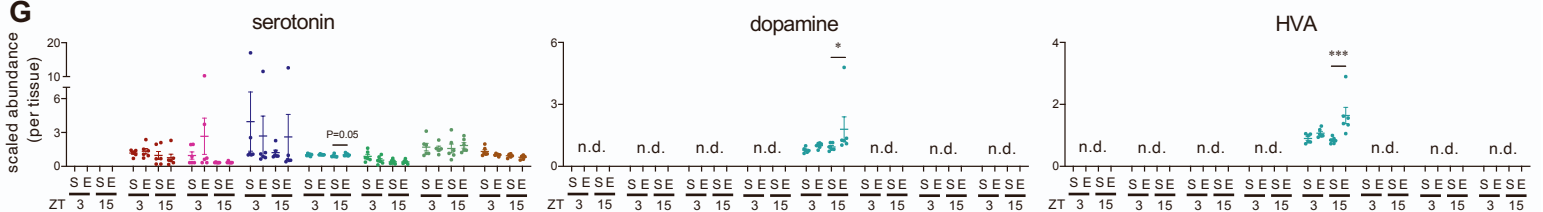



**Figure S1 Atlas of metabolome in response to exercise at different times of the day (related to Figure 1)**

(A) Significantly altered metabolites in a specific tissue alone or in combination among different tissues. Vertical bars indicate set size, horizontal bars indicate intersection size, and dots and lines indicate set identity.

(B) PCA plots based on 289 metabolites common to all 7 tissues and serum. PCA plots of all metabolomics samples combined (only common metabolites were included) samples. Color of the dot refers to tissue and shape refers to sedentary or exercise condition.

(C) Bar charts show number of metabolites significantly decreased (right) and increased (left) upon exercise at ZT3 versus ZT15 in 7 tissues and serum.

(D) Relative decreased (left) and increased (right) metabolites after exercise at ZT15 to those after exercise at ZT3 in 7 tissues and serum.

(E) Top 5 metabolites in response to exercise at ZT3 versus ZT15.

Metabolomics data contain 5-6 individual tissues per group. Two-way ANOVA was applied for the detection of significantly altered metabolites using p-value cutoff of 0.05.

(F) Corticosterone, urea, beta-hydroxybutyrate (BHB) as time- and tissue-independent metabolites in response to exercise.

(G) Time-dependent impact of exercise on hypothalamic neurotransmitters serotonin, dopamine, and homovanillate (HVA). Data are represented as mean $\pm$ SEM (n=5-6) and were analyzed by two-way ANOVA based on statistical methods of Metabolon (Sedentary versus Exercise at corresponding time of treatment). \*p<0.05, \*\*p<0.01, and \*\*\*p<0.001. S; Sedentary, E; Exercise.

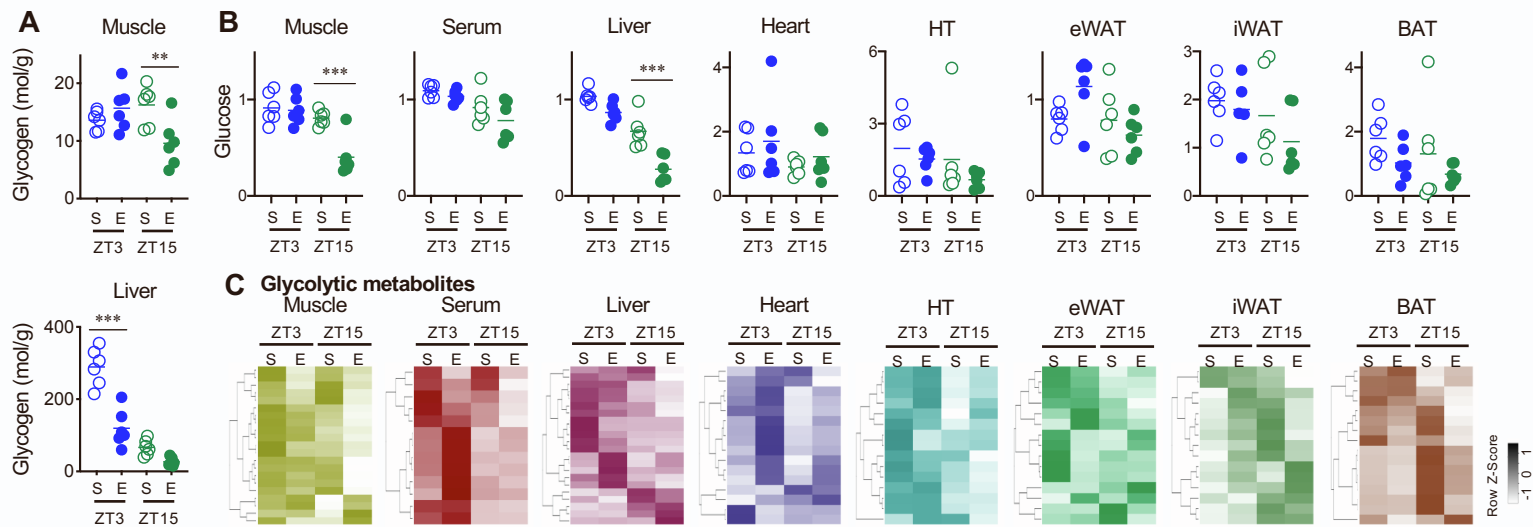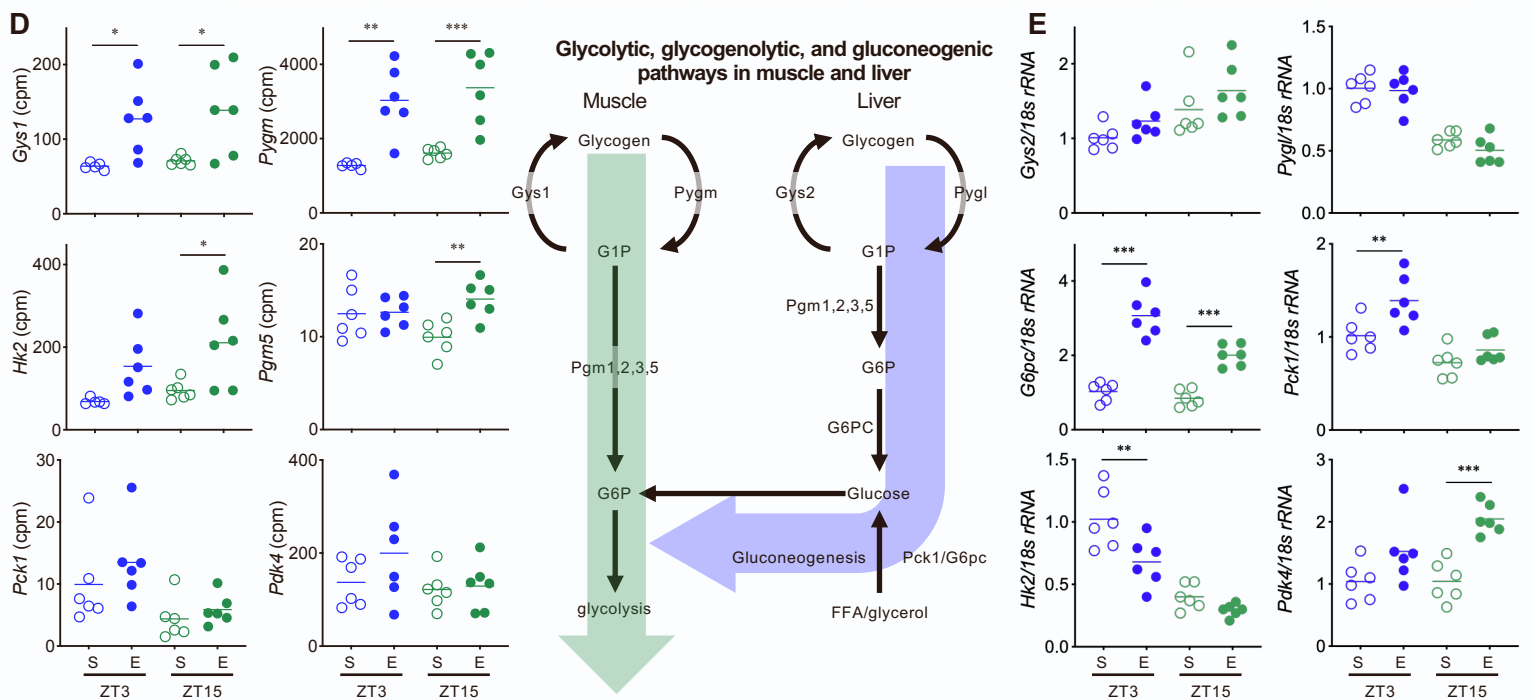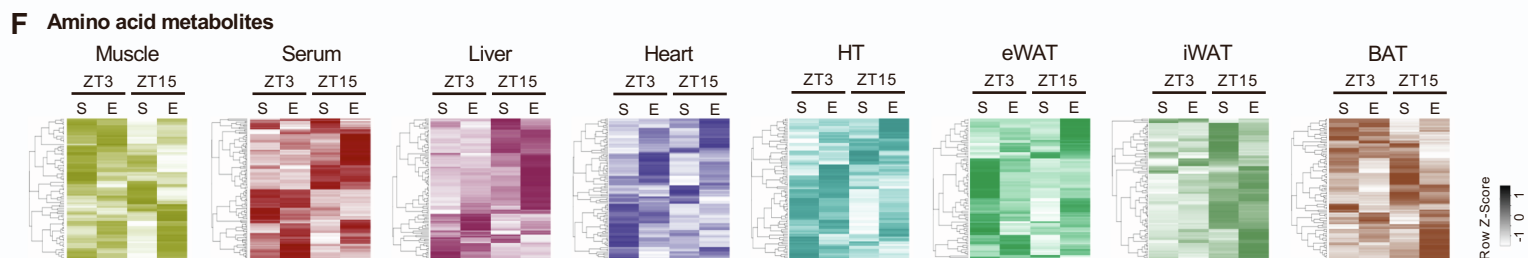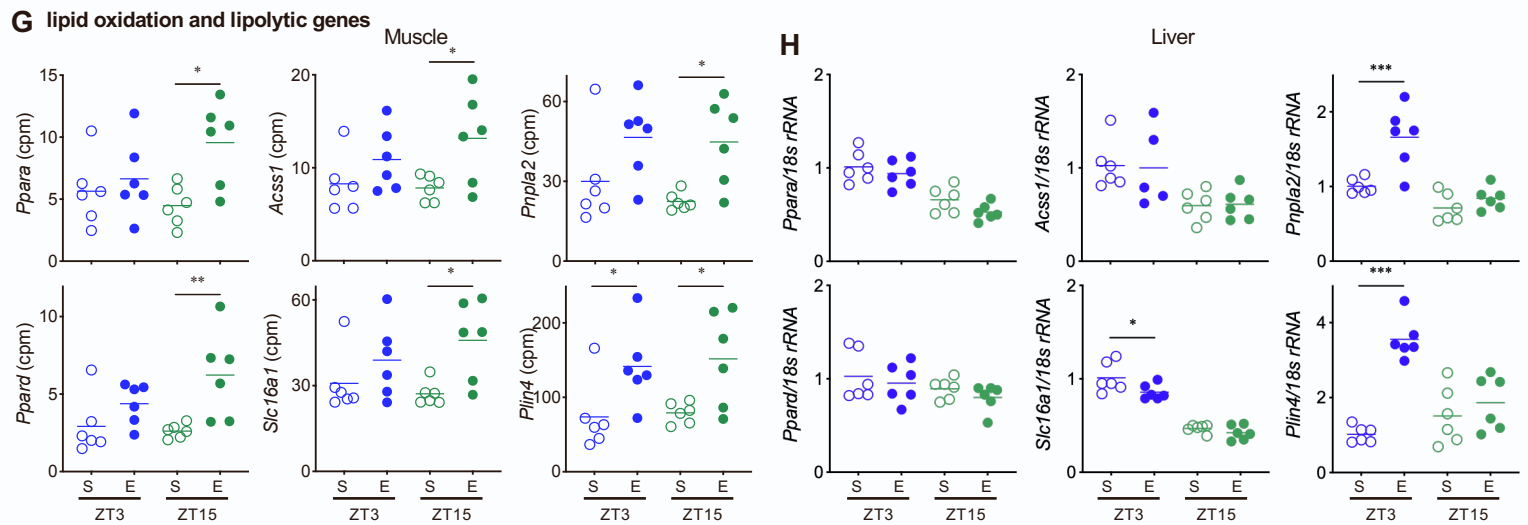

## Figure S2 Spatiotemporal impacts of exercise on metabolism (Related to Figure 2)

(A) Glycogen amount in skeletal muscle and liver isolated mice after exercise at ZT3 versus ZT15 (Sato et al., 2019).

(B) Glucose levels are detected by MS in skeletal muscle, serum, liver, heart, HT, eWAT, iWAT and BAT from mice subjected to exercise at ZT3 versus ZT15.

(C) Heatmaps displaying metabolites related to glycolysis and TCA cycle in skeletal muscle, serum, liver, heart, HT, eWAT, iWAT and BAT.

(D) Glycogenolytic, glycolytic and gluconeogenic gene expression in skeletal muscle determined using published transcriptomic data (GSE126962) (Sato et al., 2019).

(E) Glycogenolytic, glycolytic and gluconeogenic gene expression in liver determined by qPCR.

(F) Heatmaps displaying metabolites related to amino acid metabolism in skeletal muscle, serum, liver, heart, HT, eWAT, iWAT, and BAT.

(G and H) Gene expression related to lipid metabolism upon exercise at ZT3 and ZT15 in skeletal muscle and liver.

(G) Selective activation of lipid oxidation pathway in skeletal muscle after exercise at the early active phase versus the early rest phase as revealed by our published (Sato et al., 2019) skeletal muscle transcriptome after exercise at ZT3 and ZT15 (GSE126962).

(H) Selective activation of lipolytic pathway in liver after exercise at the early rest phase versus the early active phase revealed by qPCR.

Metabolomics data contain 5-6 individual tissues per group. Two-way ANOVA was applied for the detection of significantly altered metabolites using p-value cutoff of 0.05. Data are represented as mean $\pm$ SEM (n=6) and were analyzed by two-way ANOVA using Bonferroni *post hoc* testing (Sedentary versus Exercise at corresponding time of treatment). \*p<0.05, \*\*p<0.01, and \*\*\*p<0.001. S; Sedentary, E; Exercise.

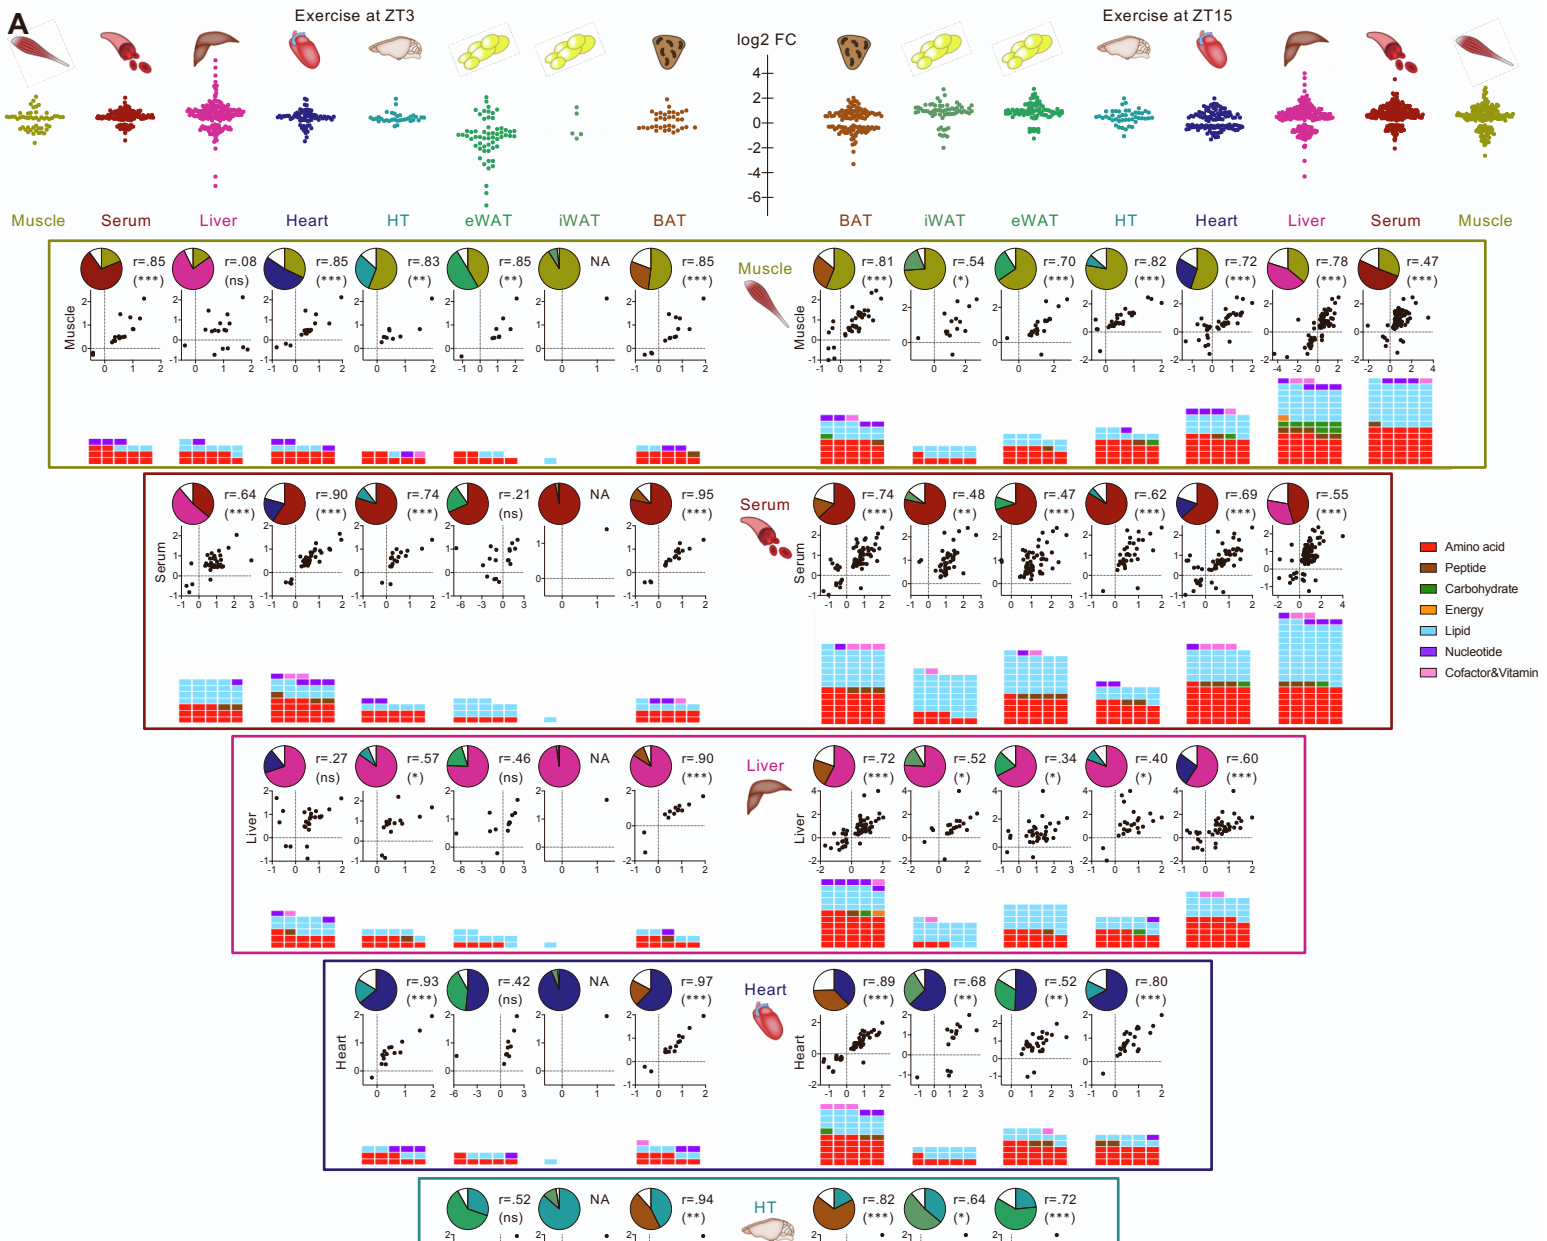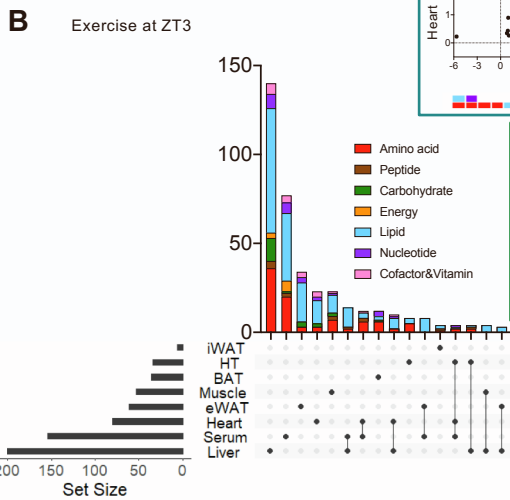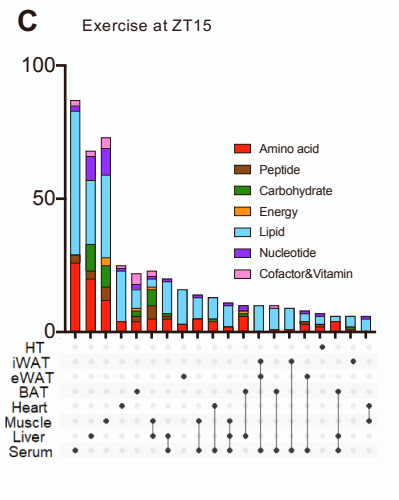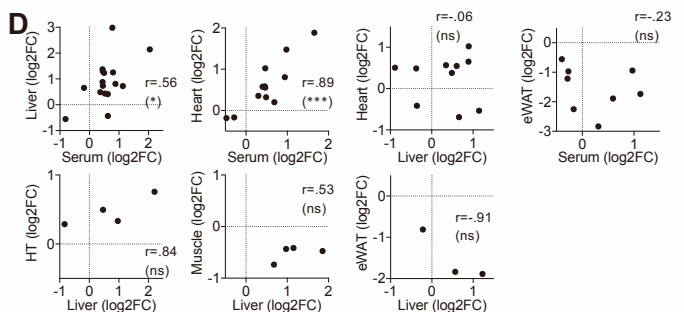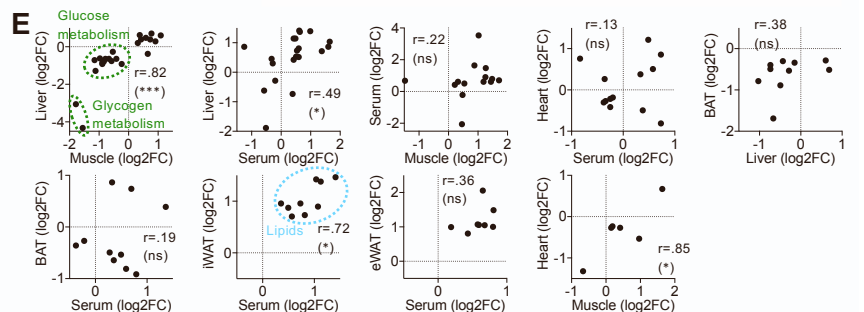



**Figure S3 Integration and comparison of time of day-dependent effects of exercise across different tissues (Related to Figures 1 and 2)**

(A) Tissue-tissue correlation of metabolome in response to exercise at ZT3 (left) and ZT15 (right). Upper chart, each dot is a metabolite significantly increased or decreased by exercise at ZT3 (left) and ZT15 (right). Pie charts, comparing the ratio of common (white pieces) and tissue-specific metabolites altered after exercise between two tissues. Correlation charts, displaying metabolites changed commonly in the combination of each tissue after exercise at ZT3 (left) and ZT15 (right). Correlation coefficient and significance are measured based on the Pearson correlation coefficient. \* $p < 0.033$ , \*\* $p < 0.002$ , and \*\*\* $p < 0.001$ . Waffle plots, showing biological classification of correlated metabolites changed after exercise at ZT3 (left) and ZT15 (right) between two tissues. Each square indicates each metabolite.

(B and C) Unique metabolites significantly changed after exercise at ZT3 (B) and ZT15 (C) either in a specific tissue alone or in combination with different tissues. Data placed as a frequent order. Vertical bars indicate set size, horizontal bars indicate intersection size, and dots and lines indicate set identity.

(D and E) Correlation charts displaying metabolites changed only in each specific combination of two different tissues after exercise at ZT3 (D) and ZT15 (E). Correlation coefficient and significance are measured based on the Pearson correlation coefficient. \*  $p < 0.033$  and \*\*\* $p < 0.001$ .

The metabolomic data contain 5-6 individual tissues per group. Two-way ANOVA was applied for the detection of the significance of altered levels of metabolites using p-value cutoff of 0.05.

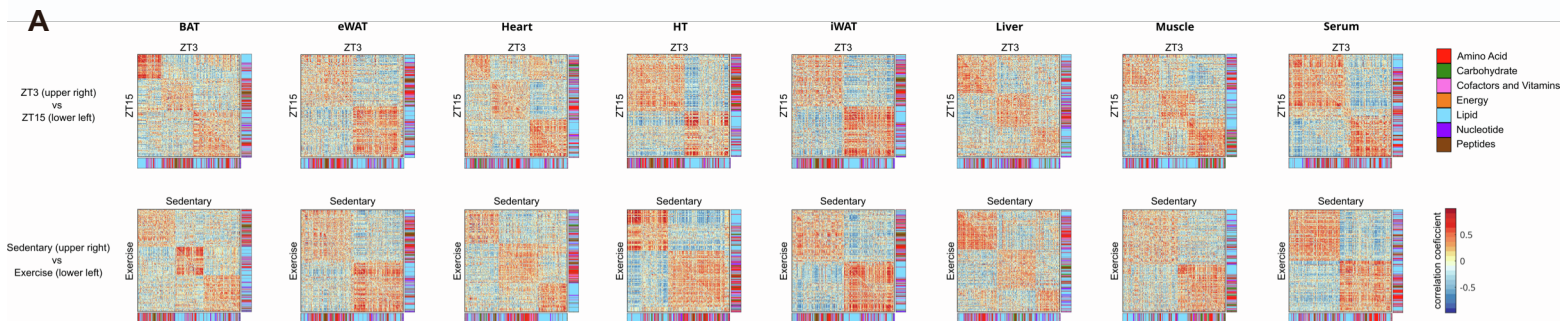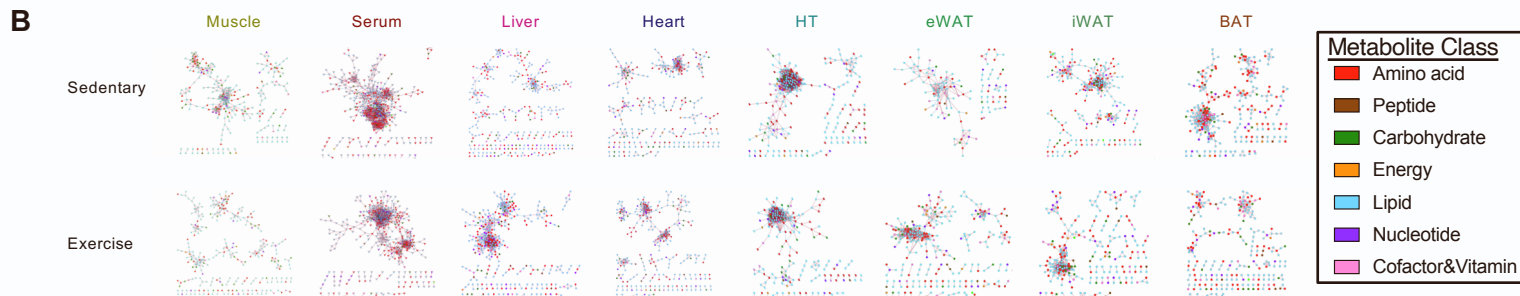

**C**

| tissue | Sedentary Nodes (metabolites) | Exercise Nodes (metabolites) | Sedentary Edges (correlations) | Exercise Edges (correlations) |
|--------|-------------------------------|------------------------------|--------------------------------|-------------------------------|
| Muscle | 274                           | 293                          | 535                            | 383                           |
| Serum  | 390                           | 391                          | 1321                           | 1120                          |
| Liver  | 344                           | 387                          | 456                            | 1049                          |
| Heart  | 283                           | 294                          | 487                            | 605                           |
| HT     | 236                           | 201                          | 1404                           | 933                           |
| eWAT   | 133                           | 276                          | 225                            | 595                           |
| iWAT   | 251                           | 245                          | 712                            | 573                           |
| BAT    | 288                           | 253                          | 692                            | 334                           |

**D** Intra-tissue rewired networks sedentary exercise

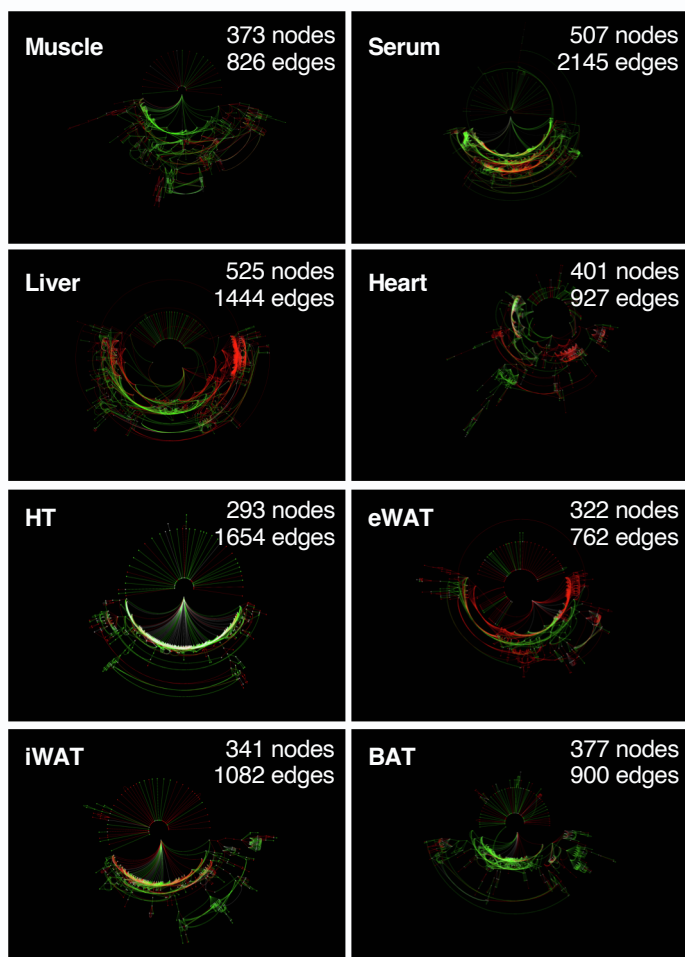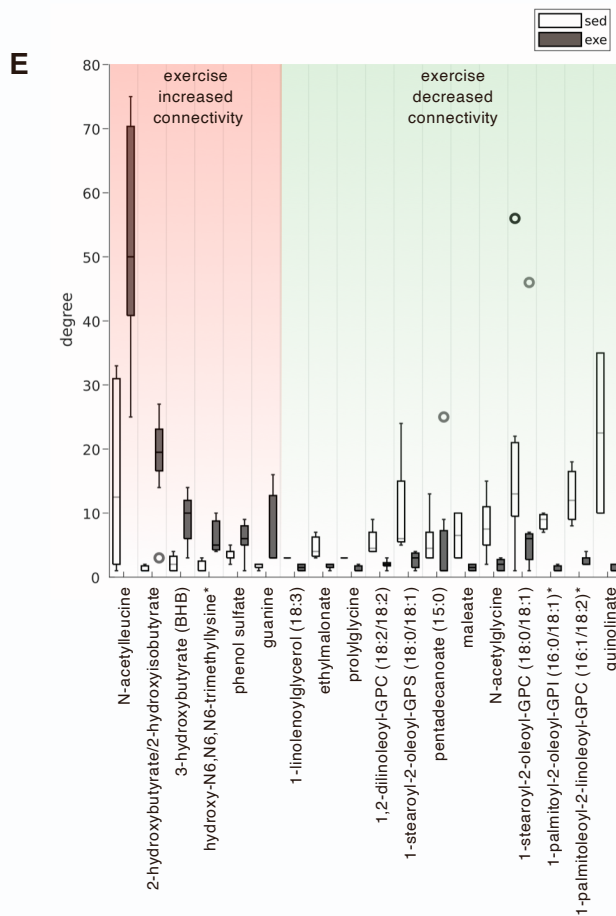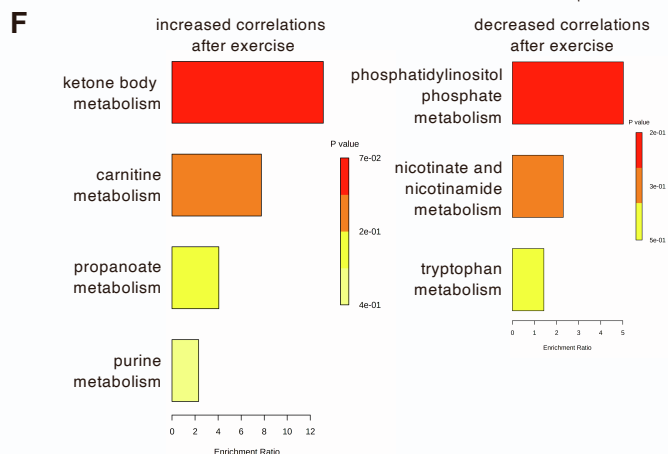

#### Figure S4 Intra-tissue metabolite correlations (Related to Figure 3)

(A) Correlation heatmaps for metabolites in each tissue. Upper row compares correlations dependent on time ZT15 vs ZT3, lower row compares correlations upon exercise versus sedentary. Metabolite class is indicated on the bottom and right color bars. Correlation coefficient  $\rho$  is shown as red (positive) or blue (negative) as indicated.

(B) Networks of significantly correlated metabolites detected in each tissue under sedentary or exercise conditions. Each node refers to a metabolite, color refers to metabolite class. Edges are drawn for each significant intra-tissue correlation, and color refers to correlation coefficient sign (red, positive; blue, negative).

(C) Total number of correlated metabolite nodes and edges detected in each tissue.

(D) Combined DyNet visualization of metabolite interaction networks highlighting rewired nodes and edges in each tissue. Red nodes and edges are present only under exercise; green nodes and edges are present only under sedentary conditions; grey nodes and edges are present under both.

(E) Comparison of metabolite degree distributions over all tissues between exercise (gray) and sedentary (white) conditions. A change in degree distribution was estimated using Two-sample Kolmogorov-Smirnov goodness-of-fit hypothesis test. Only metabolites with significantly altered degree distribution are shown. Red background refers to metabolites with an increase in the degree distribution upon exercise, green background to metabolites with decreased distributions.

Horizontal line indicates the median, the size of the boxes refers to upper and lower quartiles, whiskers are minimum and maximum values, and circles refer to outliers.

(F) Bar charts showing Metaboanalyst KEGG pathway enrichment ratio for metabolites that shift degree distribution upon exercise.

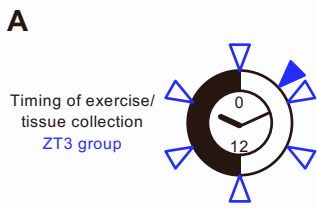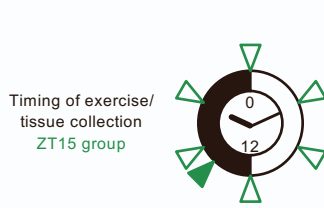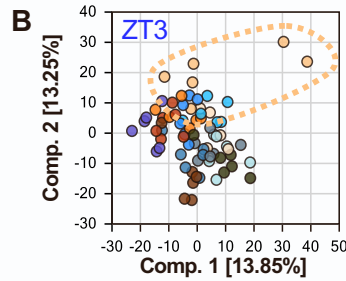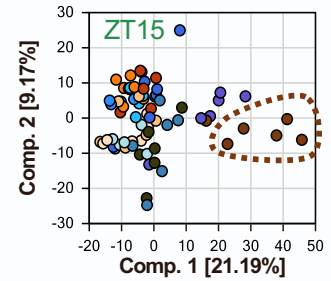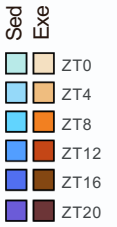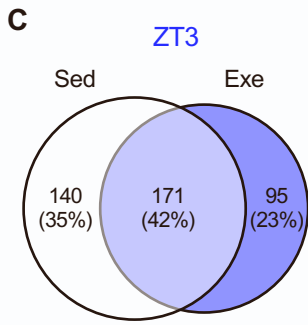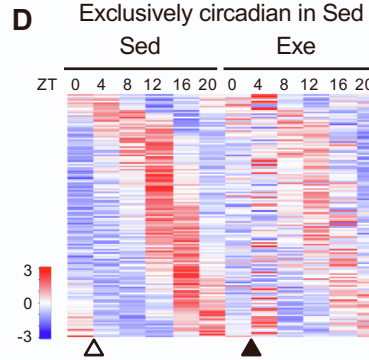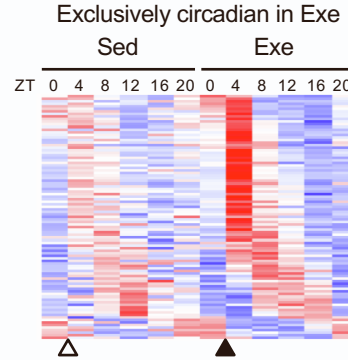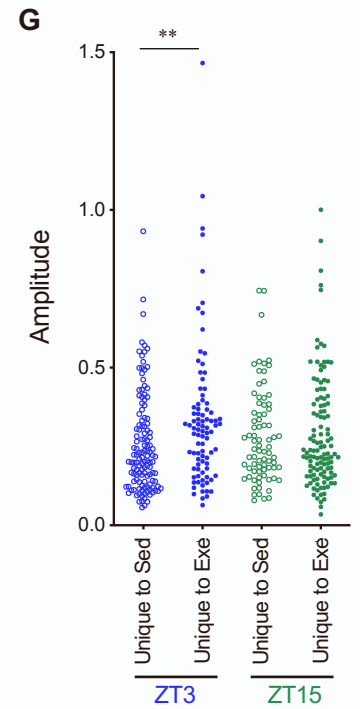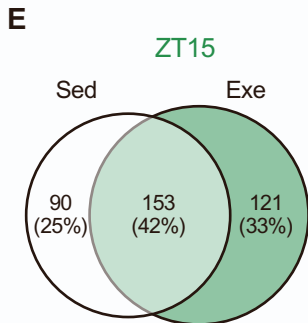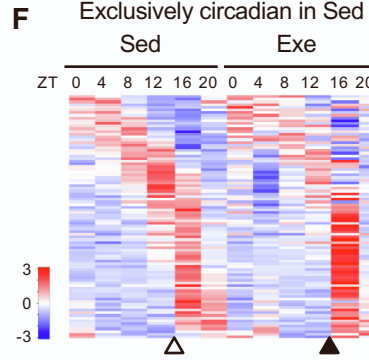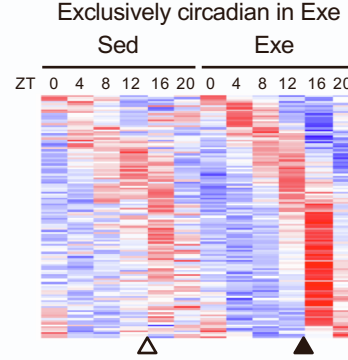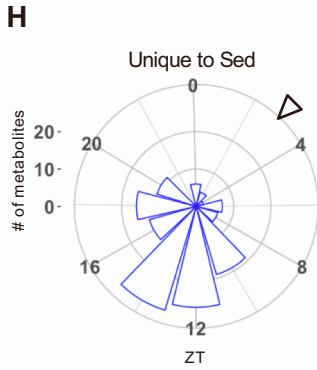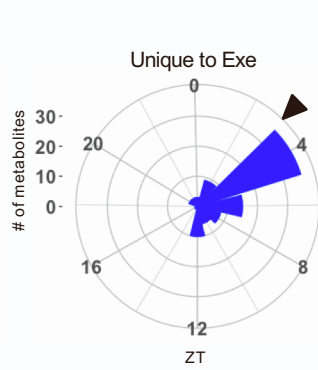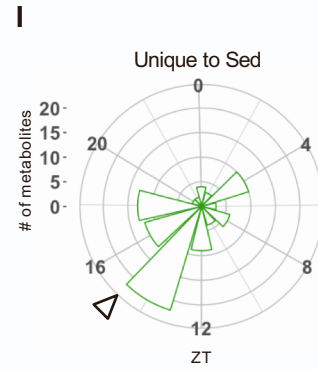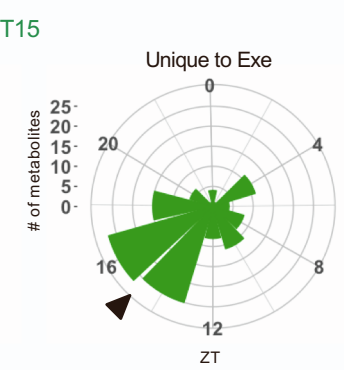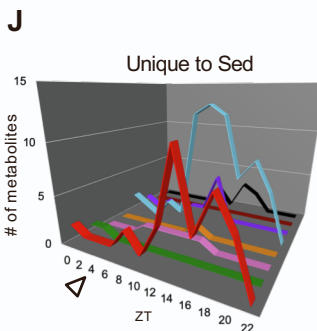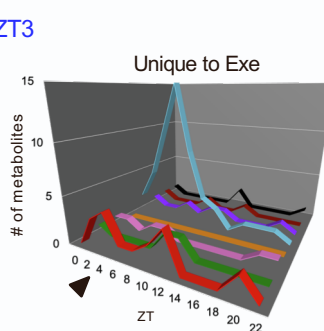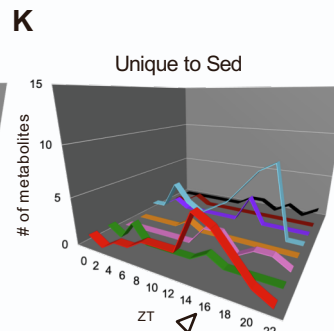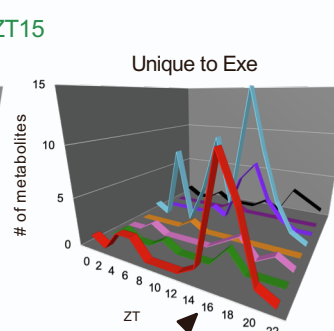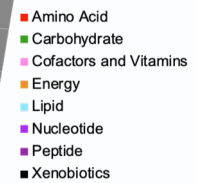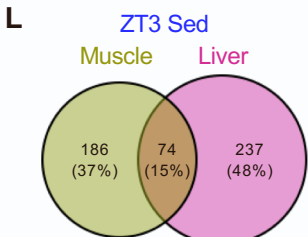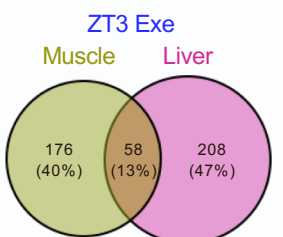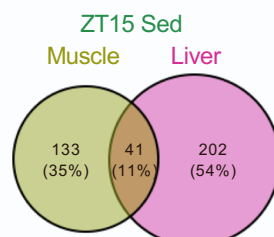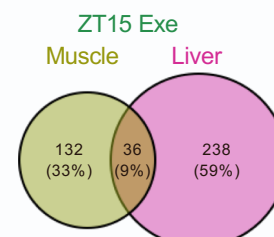



**Figure S5 Liver 24h metabolome under exercise at different times of day (Related to Figure 4)**

(A) Daily timing for the acute exercise during the early rest phase (ZT3) and early active phase (ZT15) and tissue collection every 4h after exercise or sham exercise. Clock icon indicates the timing of exercise (filled triangles) and subsequent tissue collection (open triangles).

(B) PCA plots illustrating the distribution of liver metabolites from the sedentary (Sed) mice versus exercise (Exe) mice at corresponding time of day.

(C) Venn diagram showing the number and ratio of cycling metabolites in liver collected from the Sed and Exe mice at the early rest phase (ZT15).

(D) Heatmaps displaying metabolites exclusively circadian in the Sed (left panel) and Exe (right panel) mice at the early rest phase.

(E) The number and ratio of rhythmic metabolites in the Sed liver and Exe liver at the early active phase (ZT15).

(F) Cycling liver metabolites found exclusively in the Sed and Exe mice at the early active phase.

(G) Amplitude distribution of rhythmic metabolites in the Sed and Exe mice at the early rest phase versus the early active phase.

\*\* $p < 0.01$  analyzed by Student's t-test.

(H and I) The phase lag of circadian metabolites unique to the Sed (left) and Exe (right) mice at the early rest phase (ZT3, H) and the early active phase (ZT15, I).

(J and K) Temporal metabolites landscape of circadian metabolites exclusively in the Sed (left) and Exe (right) liver at the early rest phase (ZT3, J) and the early active phase (ZT15, K).

(L) Overlap of rhythmic metabolites between muscle and liver in 4 different conditions, including the Sed mice at ZT3, Exe mice at ZT3, Sed mice at ZT15, and Exe mice at ZT15. Venn diagrams showing the number and ratio of cycling metabolites either or both in muscle and liver.

Sed; Sedentary, Exe; Exercise.

**A**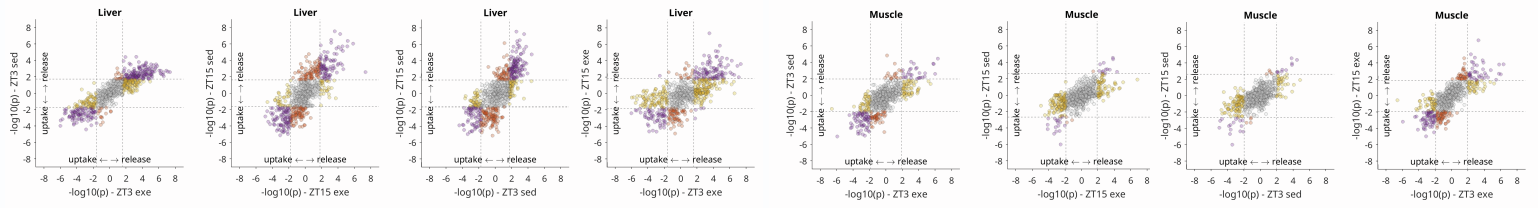**B**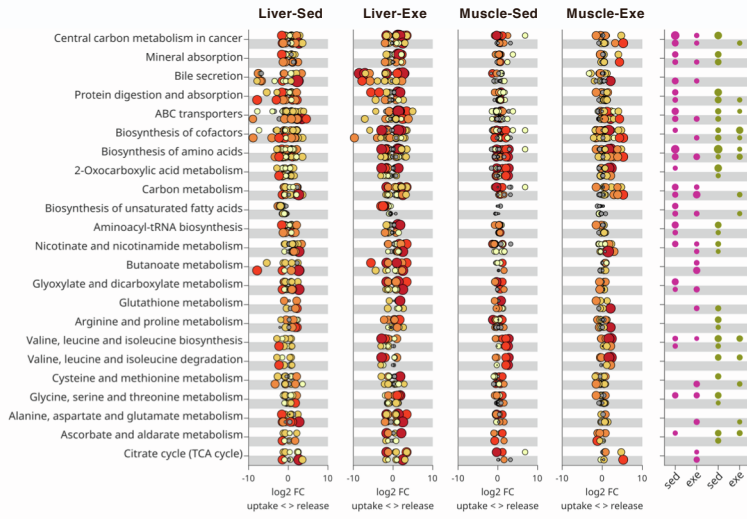**C**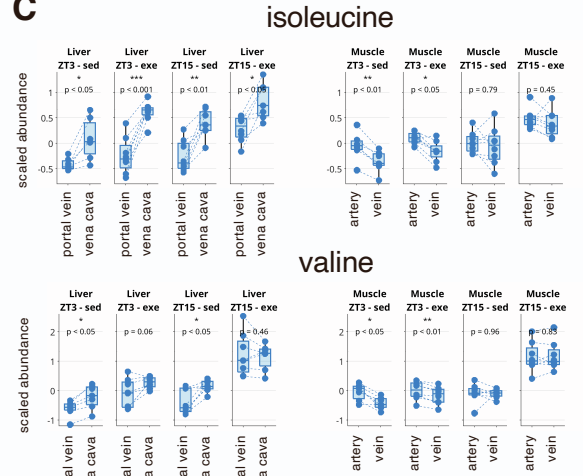**D**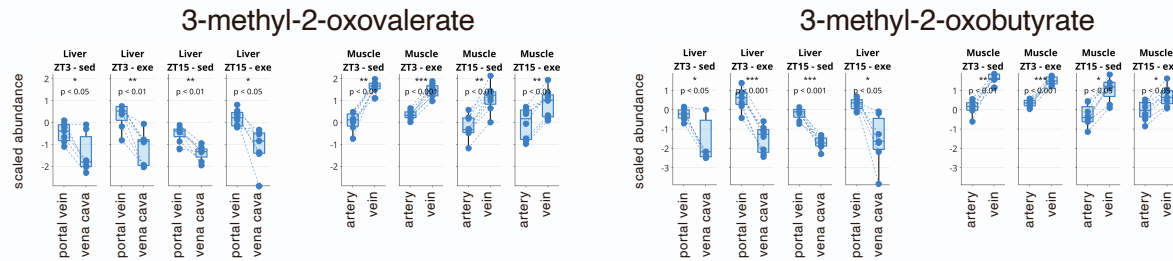**E**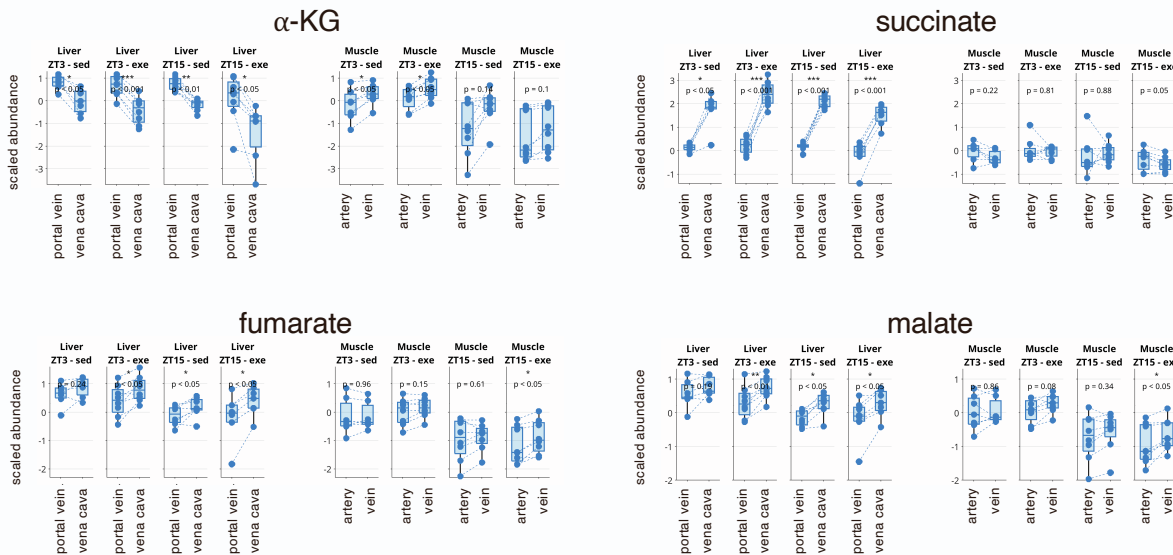**F**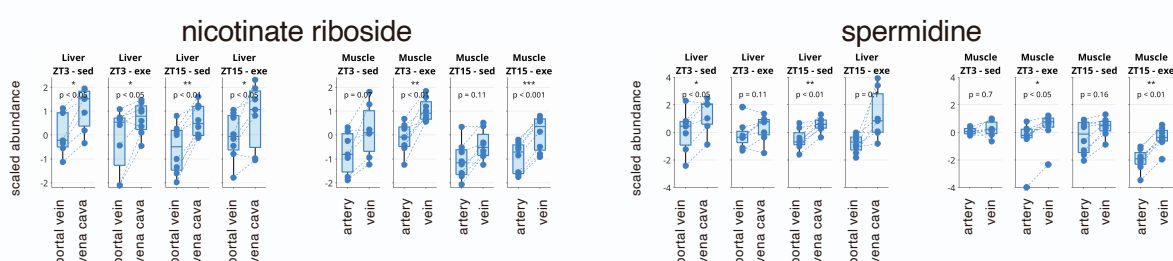

**Figure S6 Arteriovenous differences of liver and muscle metabolites after timed exercise (Related to Figure 6)**

(A) Correlation plot for metabolite uptake/release under sedentary (sed) and exercise (exe) conditions within liver and muscle according to time. Directed p-values are defined as  $-\log_{10}(p)$  times sign of fold change. Dashed lines denote FDR-adjusted significance alpha level of 0.05. Each dot refers to one metabolite under different conditions. Colors refer to significance assignment. Purple dots are significant in both conditions, yellow dots only in x-axis condition, orange in y-axis, and grey dots are not significant.

(B) KEGG enrichment analysis identifying time-dependent impact of exercise on liver and muscle metabolite uptake/release under sedentary (sed) or exercise (exe) conditions. Tissue-specific metabolite dotplots for liver and muscle under exercise and sedentary conditions show significant metabolites mapped to specific pathways.  $\log_2$  FC (fold-change) refers to uptake and release. Size and color of the dots indicate significance of regulated ( $-\log_{10}(p)$ ) metabolites. Grey dots refer to metabolites mapped to the pathway, but not significantly regulated. White background areas indicate metabolites at ZT3 and grey background indicates metabolites at ZT15. Significance of whole pathway enrichment is displayed in the right dotplot. Colors of the dots refer to tissue and size refers to the enrichment significance ( $-\log_{10}(p)$ ). Significant ( $p < 0.01$ ) pathways are shown.

(C-F) Boxplots and relative A/V differences of selected metabolites ( $n=6$ ; all adjusted  $*p < 0.05$ ,  $**p < 0.01$ , and  $***p < 0.001$ , paired t-test; horizontal line of boxes indicates the median, size of the boxes reflect upper and lower quartiles, whiskers are minimum and maximum values, and dashed lines connect A/V data from individual mice).

A

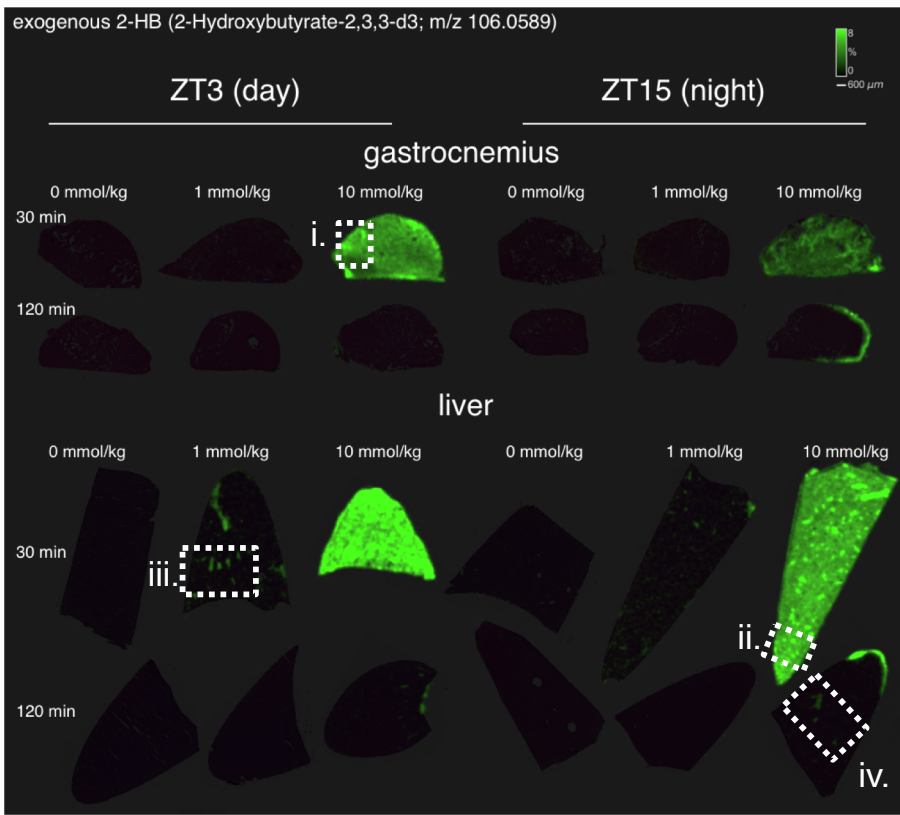

B

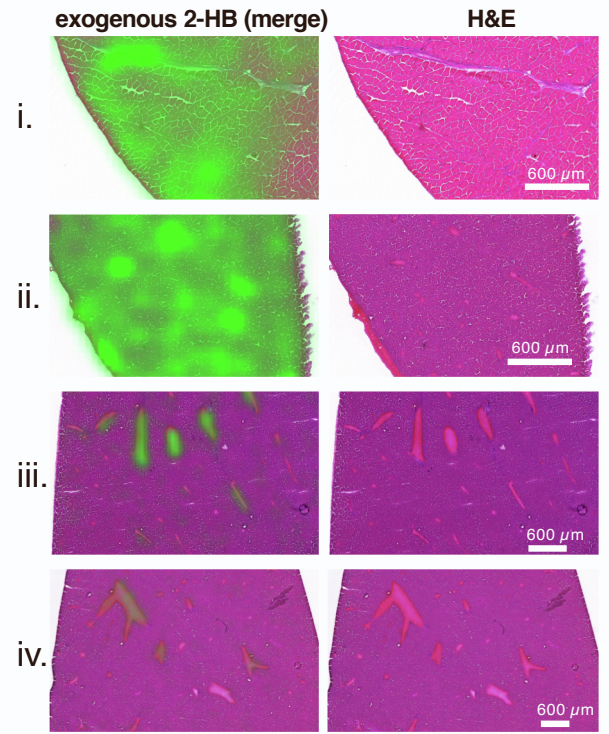

C

metabolites correlated with exogenous 2-HB (30min;  $\text{adj}p < 0.05$ ;  $\rho > 0.4$ )

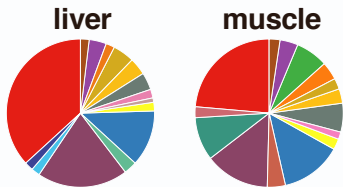

| liver (106) | muscle (127) | class                           |
|-------------|--------------|---------------------------------|
| 39          | 30           | Amino acids & peptides          |
| 21          | 18           | Fatty Acids & Conjugates        |
| 13          | 17           | Monosaccharides                 |
| 0           | 12           | Eicosanoids                     |
| 0           | 9            | Steroids                        |
| 4           | 8            | Purines                         |
| 4           | 5            | TCA acids                       |
| 0           | 5            | Indoles                         |
| 2           | 5            | Steroids                        |
| 5           | 3            | Short-chain acids & derivatives |
| 4           | 4            | Pyrimidines                     |
| 2           | 3            | Organic dicarboxylic acids      |
| 2           | 3            | Tryptamines                     |
| 0           | 3            | Bile acids                      |
| 3           | 0            | Imidazoles                      |
| 2           | 2            | Phenylacetic acids              |
| 2           | 0            | Benzoic acids                   |
| 2           | 0            | Benzamides                      |
| 1           | 0            | Phenols                         |

liver

| enriched KEGG pathway                             | hits | FDR   |
|---------------------------------------------------|------|-------|
| Alanine, aspartate & glutamate metabolism         | 13   | 0.000 |
| Arginine biosynthesis                             | 9    | 0.000 |
| Aminoacyl-tRNA biosynthesis                       | 17   | 0.000 |
| Arginine & proline metabolism                     | 14   | 0.001 |
| Valine, leucine & isoleucine biosynthesis         | 6    | 0.001 |
| D-Glutamine & D-glutamate metabolism              | 5    | 0.001 |
| Histidine metabolism                              | 8    | 0.002 |
| Fructose & mannose metabolism                     | 9    | 0.002 |
| beta-Alanine metabolism                           | 9    | 0.002 |
| Pantothenate & CoA biosynthesis                   | 8    | 0.004 |
| Glycine, serine & threonine metabolism            | 11   | 0.004 |
| Butanoate metabolism                              | 7    | 0.004 |
| Ascorbate & aldarate metabolism                   | 5    | 0.005 |
| Glycolysis / Gluconeogenesis                      | 9    | 0.009 |
| Pyruvate metabolism                               | 8    | 0.010 |
| Galactose metabolism                              | 9    | 0.010 |
| Pentose & glucuronate interconversions            | 7    | 0.012 |
| Phenylalanine metabolism                          | 5    | 0.013 |
| Tryptophan metabolism                             | 11   | 0.020 |
| Phenylalanine, tyrosine & tryptophan biosynthesis | 3    | 0.021 |
| D-Arginine and D-orithine metabolism              | 3    | 0.021 |
| Pentose phosphate pathway                         | 7    | 0.032 |
| Pyrimidine metabolism                             | 10   | 0.034 |
| Valine, leucine & isoleucine degradation          | 10   | 0.039 |

muscle

| enriched KEGG pathway                     | hits | FDR   |
|-------------------------------------------|------|-------|
| Pentose phosphate pathway                 | 14   | 0.000 |
| Tryptophan metabolism                     | 19   | 0.000 |
| Fructose & mannose metabolism             | 11   | 0.000 |
| Arginine & proline metabolism             | 15   | 0.001 |
| Galactose metabolism                      | 11   | 0.007 |
| Alanine, aspartate & glutamate metabolism | 11   | 0.009 |
| beta-Alanine metabolism                   | 9    | 0.011 |
| Ascorbate & aldarate metabolism           | 5    | 0.019 |
| Pantothenate & CoA biosynthesis           | 8    | 0.020 |
| Amino sugar & nucleotide sugar metabolism | 12   | 0.021 |
| Histidine metabolism                      | 7    | 0.024 |
| Glycolysis / Gluconeogenesis              | 9    | 0.037 |
| Arginine biosynthesis                     | 6    | 0.045 |

D

top 20 metabolites +/- correlated with exogenous 2-HB (30 min & 120 min)

| liver                                 |          |         |       |          | muscle                       |          |         |       |         |
|---------------------------------------|----------|---------|-------|----------|------------------------------|----------|---------|-------|---------|
| Compound name                         | m/z      | adduct  | rho   | FDR      | Compound name                | m/z      | adduct  | rho   | FDR     |
| (S)-Lactate                           | 89.0243  | M-H     | 0.79  | 0.0E+00  | 4-Aminobutyraldehyde         | 108.0431 | M+Na-2H | 0.65  | 2.5E-76 |
| L-Alanine                             | 88.0403  | M-H     | 0.71  | 0.0E+00  | Thymidine                    | 277.0589 | M+Cl    | 0.64  | 1.8E-73 |
| 4-Aminobutyraldehyde                  | 108.0431 | M+Na-2H | 0.70  | 1.8E-14  | Guanidinoacetate             | 98.0355  | M-H2O-H | 0.63  | 6.3E-49 |
| Guanidinoacetate                      | 98.0355  | M-H2O-H | 0.69  | 1.8E-14  | D-Glucuronolactone           | 175.0248 | M-H     | 0.63  | 0.0E+00 |
| 3,4-Dihydroxy-L-phenylalanine         | 178.051  | M-H2O-H | 0.68  | 2.0E-178 | Pantetheine                  | 277.1232 | M-H     | 0.63  | 3.3E-48 |
| D-Glucuronolactone                    | 175.0248 | M-H     | 0.65  | 0.0E+00  | Glutathione                  | 344.0331 | M+K-2H  | 0.62  | 9.3E-70 |
| L-Histidine                           | 154.0621 | M-H     | 0.64  | 0.0E+00  | (S)-Lactate                  | 89.0243  | M-H     | 0.62  | 0.0E+00 |
| L-Glutamate                           | 146.0458 | M-H     | 0.63  | 0.0E+00  | Cytidine                     | 264.0596 | M+Na-2H | 0.61  | 6.3E-67 |
| D-Glucose                             | 215.0323 | M+Cl    | 0.63  | 1.2E-69  | Hexadecanoic acid            | 255.2331 | M-H     | 0.61  | 1.2E-66 |
| 3-Hydroxyanthranilate                 | 174.017  | M+Na-2H | 0.62  | 0.0E+00  | D-Glucose 6-phosphate        | 259.0225 | M-H     | 0.61  | 2.9E-66 |
| Adenine                               | 134.0472 | M-H     | -0.48 | 6.0E-76  | L-2-Amino-3-oxobutanoic acid | 152.0115 | M+Cl    | -0.58 | 7.7E-04 |
| L-Glutamine                           | 145.0618 | M-H     | -0.49 | 2.3E-06  | L-Proline                    | 152.0115 | M+K-2H  | -0.58 | 7.7E-04 |
| 7 $\alpha$ -Hydroxycholest-4-en-3-one | 435.3026 | M+Cl    | -0.50 | 0.0E+00  | Octanoic acid                | 143.1076 | M-H     | -0.59 | 6.6E-05 |
| AMP                                   | 346.0566 | M-H     | -0.50 | 1.3E-84  | L-Serine                     | 140.0118 | M+Cl    | -0.59 | 6.0E-05 |
| Guanine                               | 150.042  | M-H     | -0.51 | 5.2E-86  | L-Glutamate                  | 146.0458 | M-H     | -0.60 | 3.2E-05 |
| UMP                                   | 323.0288 | M-H     | -0.51 | 1.3E-86  | 4-Hydroxybenzoate            | 137.0244 | M-H     | -0.64 | 6.7E-05 |
| Tryptamine                            | 159.0926 | M-H     | -0.52 | 2.8E-07  | (S)-Malate                   | 133.0142 | M-H     | -0.64 | 5.3E-06 |
| L-Phenylalanine                       | 146.0612 | M-H2O-H | -0.54 | 1.3E-07  | L-Leucine                    | 130.0872 | M-H     | -0.65 | 5.0E-06 |
| Indole-3-acetaldehyde                 | 158.0612 | M-H     | -0.56 | 2.7E-08  | L-Aspartate                  | 132.0302 | M-H     | -0.77 | 1.5E-09 |
| Serotonin                             | 157.0771 | M-H2O-H | -0.78 | 7.5E-21  | Serotonin                    | 157.0771 | M-H2O-H | -0.84 | 3.0E-11 |



**Figure S7 Uptake and impact of exogenous 2-HB on liver and muscle metabolism (Related to Figure 7)**

(A) Mouse muscle (gastrocnemius) and liver sections after MALDI imaging mass spectrometry. Green signal intensity indicates relative tissue levels of exogenous 2-HB (green) after subcutaneous administration of different doses (0, 1, or 10 mmol/kg), at different durations (30 min or 120 min) and at different times of day (ZT3 or ZT15).

(B) Zoomed regions from panel (A), along with underlying hematoxylin and eosin staining (H&E).

(C) Left pie charts and table of tissue metabolites significantly correlated with exogenous 2-HB 30 min after administration (Benjamini-Hochberg adjusted  $p < 0.05$ , Spearman coefficient  $> 0.4$  or  $< -0.4$ ). Middle and right tables show Metaboanalyst KEGG pathway enrichment of same metabolites.

(D) Table of top 20 significantly positive/negative exogenous 2-HB-associated metabolites 30 min and 120 min after administration (Benjamini-Hochberg adjusted  $p < 0.05$ , Spearman coefficient  $> 0.4$  or  $< -0.4$ ).
